# Supplementary material for: Palladium catalyzed desulfurative coupling of allyl sulfides with organoboronic acids
Source: Royal Society of Chemistry journal article supplement (doi:10.1039/d1qo01106e), 2021-01-01

## Supporting information

### Palladium Catalyzed Desulfurative Coupling of Allyl Sulfides with Organoboronic Acids

Yan-Yan Guan<sup>†a</sup>, Xiao-Xue Wu<sup>†a</sup>, Yu-Fang Liu<sup>a</sup>, Jian-Bin Chao<sup>b</sup> and Zhen-Kang Wen<sup>\*a</sup>

<sup>a</sup>School of Chemistry and Chemical Engineering, Shanxi University, Taiyuan 030006, China

<sup>b</sup>Scientific Instrument Center, Shanxi University, Taiyuan 030006, China

E-mail: zkwen@sxu.edu.cn

| <b>Table of Contents</b> .....                                                                                                  | <b>Page</b> |
|---------------------------------------------------------------------------------------------------------------------------------|-------------|
| I. General Information .....                                                                                                    | S2          |
| II. Experimental Sections.....                                                                                                  | S3          |
| 2.1 Preparation of allylic sulfides .....                                                                                       | S3          |
| 2.2 General procedure for the palladium-catalyzed cross-coupling<br>reaction of allylic sulfides with organoboronic acids ..... | S6          |
| 2.3 Instant monitoring of the reaction of <b>1a</b> with stoichiometric PdCl <sub>2</sub><br>in CDCl <sub>3</sub> .....         | S7          |
| 2.4 Characterization data for the products .....                                                                                | S9          |
| III. Reference: .....                                                                                                           | S28         |
| IV. Copy of <sup>1</sup> H NMR, <sup>13</sup> C NMR Spectra.....                                                                | S30         |

## **I. General Information**

Unless otherwise noted, all chemicals were purchased from Energy Chemical, J & K Scientific, Adamas-beta and used without further purification. Column chromatography purifications were performed using 200–300 mesh silica gel. Commercial grade solvents and reagents were used without further purification. Experiments involving moisture and/or air sensitive components were performed in oven-dried glassware under a positive pressure of nitrogen using freshly distilled solvents. Analytical thin layer chromatography (TLC) was performed using Merck 60 F254 pre-coated silica gel plate (0.2 mm thickness). Subsequent to elution, plates were visualized using UV radiation (254 nm) on Spectroline Model ENF-24061/F 254 nm. Further visualization was possible by staining with basic solution of potassium permanganate or acidic solution of ceric molybdate. Flash chromatography was performed using 200-300 mesh silica gel with the indicated solvent system. Columns were typically packed as slurry and equilibrated with the appropriate solvent system prior to use. High resolution mass spectral analysis (HRMS) was performed on an Thermo Scientific Q Exactive Instruments and was identified by Q Exactive-Orbitrap MS with an electrospray ionization (ESI) source. The melting point were collected on a WRS-3 melting point apparatus from Shanghai INESA Physico-Optical Instrument Co.,Ltd.. <sup>1</sup>H

NMR and  $^{13}\text{C}$  NMR experiments were performed with a BRUKER AVANCE III HD 600 MHz and 151 MHz NMR spectrometer, respectively (Bruker, Billerica, MA). Chemical shifts for  $^1\text{H}$  NMR spectra are reported as  $\delta$  in units of parts per million (ppm) downfield from  $\text{SiMe}_4$  ( $\delta$  0.0) and relative to the signal of chloroform-*d* ( $\delta$  7.2600, singlet). Multiplicities were given as: s (singlet); d (doublet); t (triplet); q (quartet); dd (doublets of doublet); dt (doublets of triplet); or m (multiplets). The number of protons (n) for a given resonance is indicated by nH. Coupling constants are reported as a *J* value in Hz. Carbon nuclear magnetic resonance spectra ( $^{13}\text{C}$  NMR) are reported as  $\delta$  in units of parts per million (ppm) downfield from  $\text{SiMe}_4$  ( $\delta$  0.0) and relative to the signal of chloroform-*d* ( $\delta$  77.0, triplet).

## II. Experimental Sections

### 2.1 Preparation of allylic sulfides

The allylic sulfides **1a** – **1u**, **1a-d**<sub>7</sub> were prepared according to our previously reported synthetic procedure<sup>1</sup>.

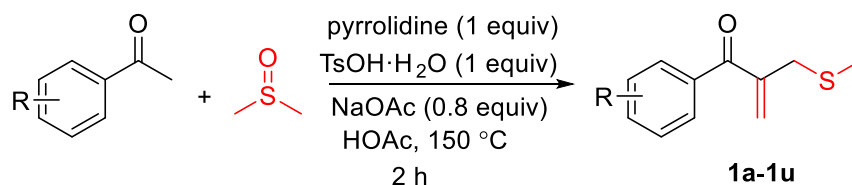

A 10 mL reaction tube equipped with a magnetic stirring bar was added with substitute acetophenone (1 mmol, 1.0 equiv), DMSO (1 mL),

TsOH • H<sub>2</sub>O (1 mmol, 1.0 equiv), pyrrolidine (1 mmol, 1.0 equiv), NaOAc (0.8 mmol, 0.8 equiv) in 4 mL HOAc. The tube was stirred at 150 °C for 2-8 h monitored by TLC until the starting material was completely consumed. The reaction mixture was cooled to room temperature, followed by the addition of water and ethyl acetate. The organic layer was separated and the aqueous layer was extracted with ethyl acetate (3×20 mL). The combined organic layer was washed with brine and dried over anhydrous Na<sub>2</sub>SO<sub>4</sub>, filtrated and concentrated *in vacuo*, the residue was purified through column chromatography on silica gel to give the desired products.

In addition, the compounds **4** and **6** were also prepared from the reported literature.<sup>1</sup>

Sulfides **1v** are commercially available from Energy Chemical. Sulfides **1w**<sup>2</sup> and **1x**<sup>3</sup> was synthesized according the reported methods<sup>4</sup>.

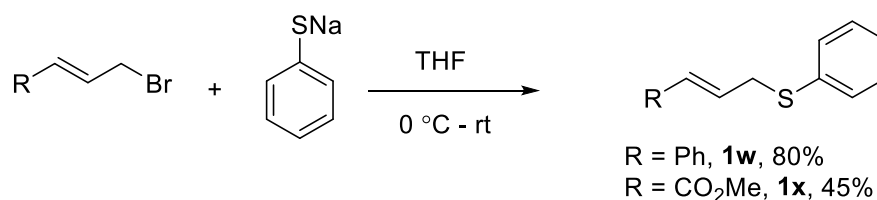

To a mixture of a flame-dried flask equipped with a stir bar, PhSNa (0.66 g, 5 mol) and THF (10 mL), substituted allylbromide (4 mmol) was added dropwise while stirring at 0 °C under water-ice bath. After addition, the mixture was warmed to room temperature and then stirred for 5 h. The

reaction was quenched by addition of 30 mL saturated  $\text{NH}_4\text{Cl}$  solution, then extracted with ethyl acetate (30 mL $\times$ 2), the extracted organic mixture was dried over  $\text{Na}_2\text{SO}_4$  and concentrated under vacuum. The crude product was purified by silica gel column chromatography (hexanes) to afford the corresponding product.

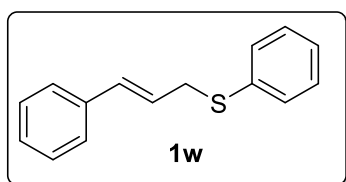

This compound was prepared by the general procedure described above and was obtained as colorless oil (0.72 g, 80 %). Rf (10:1 PE/EtOAc) 0.7;  $^1\text{H}$  NMR (600 MHz,  $\text{CDCl}_3$ )  $\delta$  7.39 (d,  $J = 7.9$  Hz, 2H), 7.32 – 7.27(m, 6H), 7.23 – 7.19(m, 2H), 6.43 (d,  $J = 15.7$  Hz, 1H), 6.28 – 6.23 (m, 1H), 3.72 (d,  $J = 7.1$  Hz, 2H);  $^{13}\text{C}$  NMR (151 MHz,  $\text{CDCl}_3$ )  $\delta$  136.72, 135.80, 132.76, 130.26, 128.83, 128.50, 127.55, 126.40, 126.31, 125.04, 37.12.

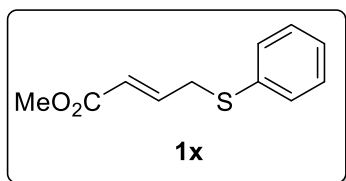

This compound was prepared by the general procedure described above and was obtained as colorless oil (375 mg, 45%). Rf (PE:EtOAc = 10:1): 0.4;  $^1\text{H}$  NMR (600 MHz,  $\text{CDCl}_3$ )  $\delta$  7.32 (d,  $J = 6.9$  Hz, 2H), 7.27 (t,  $J = 6.8$  Hz, 2H), 7.21 – 7.20 (m, 1H), 6.95 – 6.91 (m, 1H), 5.80 (d,  $J = 15.4$  Hz, 1H), 3.69 (s, 3H), 3.60 (d,  $J = 6.4$  Hz, 2H);  $^{13}\text{C}$  NMR (151 MHz,  $\text{CDCl}_3$ )  $\delta$  166.3, 143.1, 134.5, 130.5, 129.0, 126.9, 122.8, 51.5, 35.6.

## 2.2 General procedure for the palladium-catalyzed cross-coupling reaction of allylic sulfides with organoboronic acids

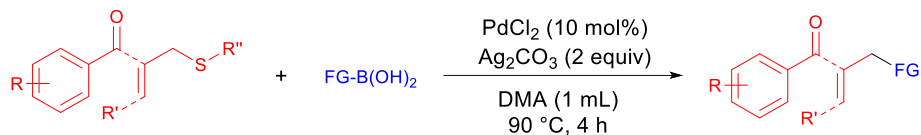

A 10 mL reaction tube equipped with a magnetic stirring bar was added allylic sulfides (0.1 mmol), PdCl<sub>2</sub> (0.01 mmol, 10 mol%), Ag<sub>2</sub>CO<sub>3</sub> (0.2 mmol, 2 equiv), organoboronic acids (0.25 mmol, 2.5 equiv), in DMA (1 mL) at 90 °C in oil bath for 4 h. The reaction mixture was cooled to room temperature, followed by the addition of water and ethyl acetate. The organic layer was separated and the aqueous layer was extracted with ethyl acetate (3 × 10 mL). The combined organic layer was washed with brine and dried over anhydrous Na<sub>2</sub>SO<sub>4</sub>, filtrated and concentrated in *vacuo*, the residue was purified through column chromatography on silica gel to give the desired products.

### Detailed procedure for the synthesis of **3a** on a 1 mmol scale

A 10 mL reaction tube equipped with a magnetic stirring bar was added allylic sulfide **1a** (1.0 mmol), PdCl<sub>2</sub> (0.1 mmol, 10 mol%), Ag<sub>2</sub>CO<sub>3</sub> (2 mmol, 2 equiv) and phenyl boronic acid (2.5 mmol, 2.5 equiv), in DMA (4 mL) at 90 °C in oil bath for 4 h. The reaction mixture was cooled to room temperature, followed by the addition of water and ethyl acetate. The organic layer was separated and the aqueous layer was extracted with ethyl acetate (3 × 30 mL). The combined organic layer was washed with

brine and dried over anhydrous  $\text{Na}_2\text{SO}_4$ , filtrated and concentrated in *vacuo*, the residue was purified through column chromatography on silica gel to give the desired products **3a** in 74% (0.164 g) yields.

### 2.3 Instant monitoring of the reaction of **1a** with stoichiometric $\text{PdCl}_2$ in $\text{CDCl}_3$

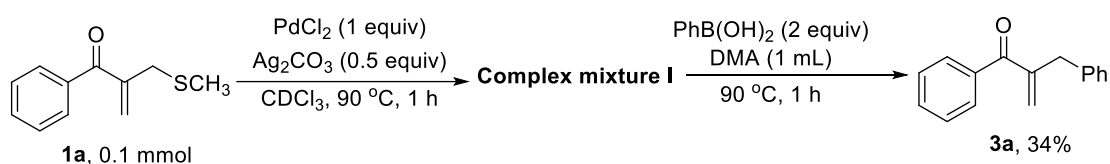

A 10 mL reaction tube equipped with a magnetic stirring bar was added allylic sulfides (0.1 mmol),  $\text{PdCl}_2$  (0.1 mmol, 1equiv),  $\text{Ag}_2\text{CO}_3$  (0.05 mmol, 0.5 equiv) in  $\text{CDCl}_3$  (0.5 mL) at  $90\text{ }^\circ\text{C}$  for 1 h, the reaction mixture (**Complex mixture I**) was measured directly by  $^1\text{H}$  NMR experiment. After that, organoboronic acids (0.2 mmol, 2 equiv) and DMA (1 mL) were added to the reaction mixture stirred at  $90\text{ }^\circ\text{C}$  for 1 h. The reaction mixture was cooled to room temperature, followed by the addition of water and ethyl acetate. The organic layer was separated and the aqueous layer was extracted with ethyl acetate ( $3 \times 10\text{ mL}$ ). The combined organic layer was washed with brine and dried over anhydrous  $\text{Na}_2\text{SO}_4$ , filtrated and concentrated in *vacuo*, the residue was purified through column chromatography on silica gel to give the desired products **3a** in 34% yield.

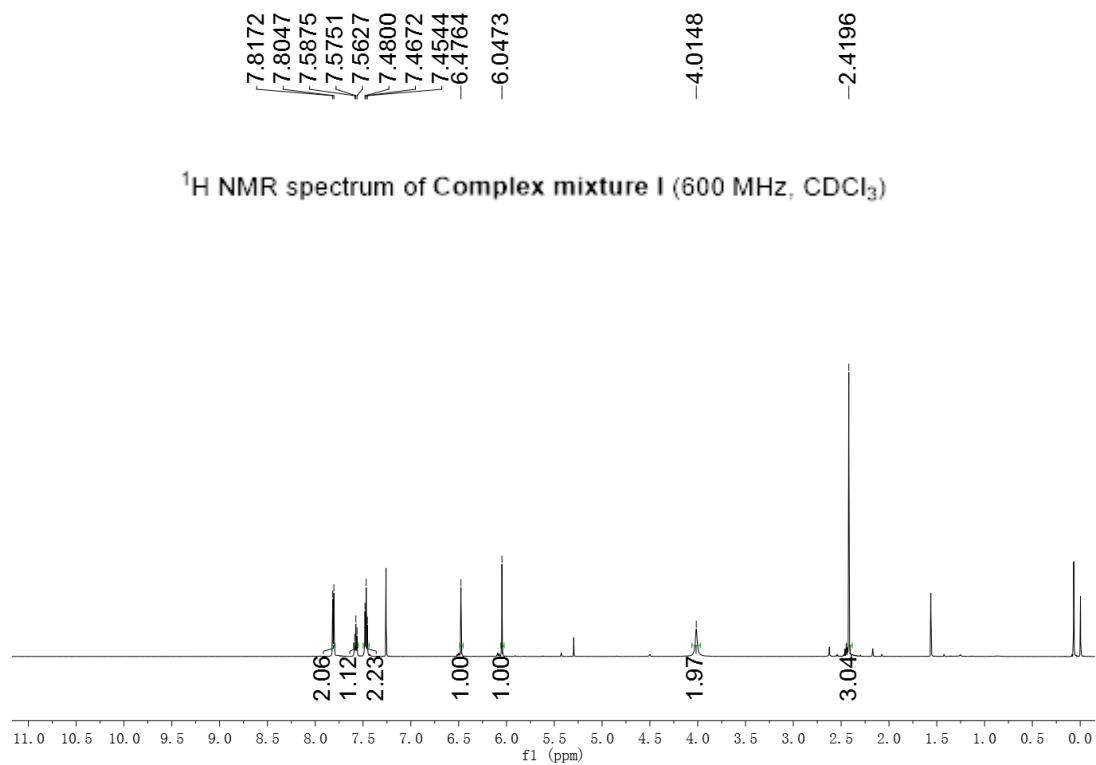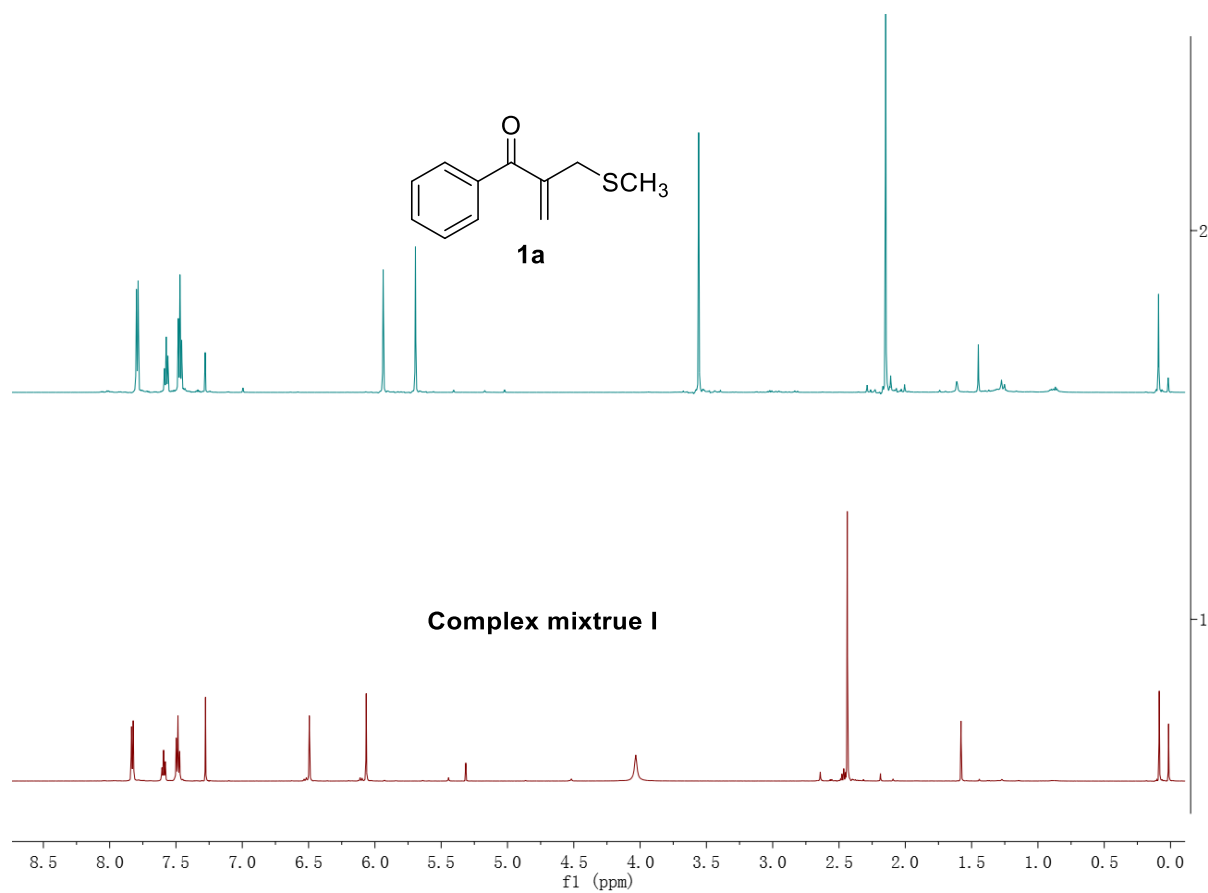

<sup>1</sup>H NMR spectrum between **1a** and **Complex mixture I**



## 2.4 Characterization data for the products

### 2-benzyl-1-phenylprop-2-en-1-one (3a)<sup>5</sup>

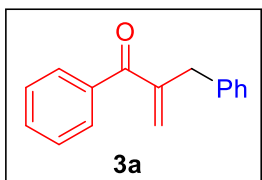

This compound was prepared by the general procedure described above and was obtained as yellow oil (17.8 mg, 80%). Rf (PE:EtOAc = 10:1): 0.61; <sup>1</sup>H NMR (600

MHz, CDCl<sub>3</sub>) δ 7.72 (d, *J* = 7.4 Hz, 2H), 7.52 (t, *J* = 7.4 Hz, 1H), 7.42 (t, *J* = 7.7 Hz, 2H), 7.31 (t, *J* = 7.5 Hz, 2H), 7.27 (d, *J* = 6.3 Hz, 2H), 7.22 (t, *J* = 7.2 Hz, 1H), 5.76 (s, 1H), 5.69 (s, 1H), 3.81 (s, 2H); <sup>13</sup>C NMR (151 MHz, CDCl<sub>3</sub>) δ 197.6, 147.6, 138.7, 137.7, 132.2, 129.5, 129.2, 128.5, 128.1, 126.9, 126.3, 38.3; HRMS (ESI) *m/z* calculated for C<sub>16</sub>H<sub>15</sub>O [M+H]<sup>+</sup>: 223.1117, found 223.1116.

### 2-benzyl-1-(*o*-tolyl)prop-2-en-1-one (3b)

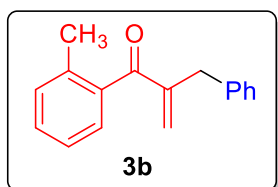

This compound was prepared by the general procedure described above and was obtained as yellow oil (17.2 mg, 73%). Rf (PE:EtOAc = 10:1):

0.65; <sup>1</sup>H NMR (600 MHz, CDCl<sub>3</sub>) δ 7.33 (dt, *J* = 7.2, 3.4 Hz, 3H), 7.28 (d, *J* = 6.8 Hz, 2H), 7.26 – 7.18 (m, 4H), 5.82 (s, 1H), 5.69 (s, 1H), 3.81 (s, 2H), 2.28 (s, 3H); <sup>13</sup>C NMR (151 MHz, CDCl<sub>3</sub>) δ 199.8, 149.1, 138.9, 138.7, 136.3, 130.7, 130.0, 129.8, 129.2, 128.5, 128.0, 126.3, 125.0, 37.0, 19.6; HRMS (ESI) *m/z* calculated for C<sub>17</sub>H<sub>17</sub>O [M+H]<sup>+</sup>: 237.1274, found 237.1272.

### 2-benzyl-1-(2-fluorophenyl)prop-2-en-1-one (3c)

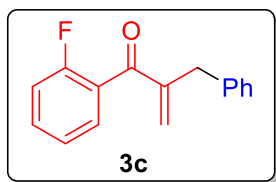

This compound was prepared by the general procedure described above and was obtained as yellow oil (18.2 mg, 76%). Rf (PE:EtOAc = 10:1):

0.58;  $^1\text{H}$  NMR (600 MHz,  $\text{CDCl}_3$ )  $\delta$  7.45 (dd,  $J = 13.5, 7.3$  Hz, 1H), 7.40 (t,  $J = 7.1$  Hz, 1H), 7.33 (t,  $J = 7.5$  Hz, 2H), 7.27 – 7.22 (m, 3H), 7.19 (t,  $J = 7.5$  Hz, 1H), 7.11 (t,  $J = 9.1$  Hz, 1H), 5.82 (s, 1H), 5.80 (s, 1H), 3.80 (s, 2H);  $^{13}\text{C}$  NMR (151 MHz,  $\text{CDCl}_3$ )  $\delta$  194.6, 159.8 (d,  $J = 251.7$  Hz), 148.6, 138.6, 132.5 (d,  $J = 8.4$  Hz), 130.2 (d,  $J = 3.3$  Hz), 129.8 (d,  $J = 2.2$  Hz), 129.2, 128.4, 127.2 (d,  $J = 15.2$  Hz), 126.3, 124.0 (d,  $J = 3.9$  Hz), 116.1 (d,  $J = 21.8$  Hz), 36.9; HRMS (ESI)  $m/z$  calculated for  $\text{C}_{16}\text{H}_{14}\text{FO}$   $[\text{M}+\text{H}]^+$ : 241.1023, found 241.1020.

### 2-benzyl-1-(3-bromophenyl)prop-2-en-1-one (3d)

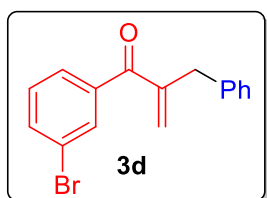

This compound was prepared by the general procedure described above and was obtained as yellow oil (25.0 mg, 83%). Rf (PE:EtOAc = 10:1):

0.57;  $^1\text{H}$  NMR (600 MHz,  $\text{CDCl}_3$ )  $\delta$  7.81 (t,  $J = 1.7$  Hz, 1H), 7.63 – 7.59 (m, 2H), 7.30 – 7.27 (m 3H), 7.24 – 7.19 (m, 3H), 5.78 (s, 1H), 5.68 (s, 1H), 3.77 (s, 2H);  $^{13}\text{C}$  NMR (151 MHz,  $\text{CDCl}_3$ )  $\delta$  196.0, 147.3, 139.5, 138.4, 135.0, 132.2, 129.8, 129.1, 128.6, 128.0, 127.7, 126.5, 122.4, 38.1; HRMS (ESI)  $m/z$  calculated for  $\text{C}_{16}\text{H}_{14}\text{BrO}$   $[\text{M}+\text{H}]^+$ : 301.0223, found 301.0220.

### 2-benzyl-1-(3-methoxyphenyl)prop-2-en-1-one (3e)

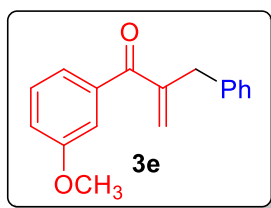

This compound was prepared by the general procedure described above and was obtained as yellow oil (13.0 mg, 52%). Rf (PE:EtOAc = 10:1):

0.49;  $^1\text{H NMR}$  (600 MHz,  $\text{CDCl}_3$ )  $\delta$  7.31 (dd,  $J = 15.8, 7.8$  Hz, 4H), 7.26 – 7.25 (m, 3H), 7.21 (t,  $J = 7.2$  Hz, 1H), 7.07 (dd,  $J = 8.0, 1.5$  Hz, 1H), 5.75 (s, 1H), 5.70 (s, 1H), 3.83 (s, 3H), 3.80 (s, 2H);  $^{13}\text{C NMR}$  (151 MHz,  $\text{CDCl}_3$ )  $\delta$  197.4, 159.4, 147.6, 139.0, 138.6, 129.1, 129.1, 128.5, 126.8, 126.3, 122.2, 118.6, 113.9, 55.4, 38.4; HRMS (ESI)  $m/z$  calculated for  $\text{C}_{17}\text{H}_{17}\text{O}_2$   $[\text{M}+\text{H}]^+$ : 253.1223, found 253.1221.

### 2-benzyl-1-(*m*-tolyl)prop-2-en-1-one (3f)<sup>6</sup>

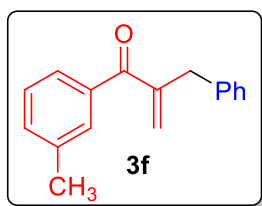

This compound was prepared by the general procedure described above and was obtained as yellow oil (18.7 mg, 79%). Rf (PE:EtOAc = 10:1):

0.58;  $^1\text{H NMR}$  (600 MHz,  $\text{CDCl}_3$ )  $\delta$  7.53 (s, 1H), 7.49 (d,  $J = 7.5$  Hz, 1H), 7.30 (dq,  $J = 14.8, 7.4$  Hz, 4H), 7.26 – 7.25 (m, 2H), 7.21 (t,  $J = 7.2$  Hz, 1H), 5.73 (s, 1H), 5.68 (s, 1H), 3.79 (s, 2H), 2.38 (s, 3H);  $^{13}\text{C NMR}$  (151 MHz,  $\text{CDCl}_3$ )  $\delta$  197.9, 147.7, 138.7, 138.0, 137.7, 133.0, 129.9, 129.2, 128.5, 128.0, 126.9, 126.8, 126.3, 38.3, 21.3; HRMS (ESI)  $m/z$  calculated for  $\text{C}_{17}\text{H}_{17}\text{O}$   $[\text{M}+\text{H}]^+$ : 237.1274, found 237.1272.

### 2-benzyl-1-(*p*-tolyl)prop-2-en-1-one (3g)

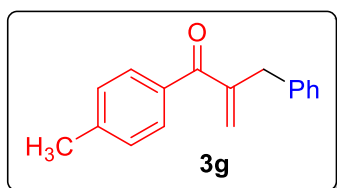

This compound was prepared by the general procedure described above and was obtained as

yellow oil (18.2 mg, 77%). Rf (PE:EtOAc = 10:1): 0.59;  $^1\text{H}$  NMR (600 MHz,  $\text{CDCl}_3$ )  $\delta$  7.65 (d,  $J = 8.0$  Hz, 2H), 7.30 (t,  $J = 7.5$  Hz, 2H), 7.25 (d,  $J = 7.6$  Hz, 2H), 7.21 (t,  $J = 8.4$  Hz, 3H), 5.71 (s, 1H), 5.65 (s, 1H), 3.80 (s, 2H), 2.40 (s, 3H);  $^{13}\text{C}$  NMR (151 MHz,  $\text{CDCl}_3$ )  $\delta$  197.4, 147.7, 143.0, 138.7, 134.9, 129.7, 129.2, 128.9, 128.5, 126.3, 126.0, 38.5, 21.6; HRMS (ESI)  $m/z$  calculated for  $\text{C}_{17}\text{H}_{17}\text{O}$   $[\text{M}+\text{H}]^+$ : 237.1274, found 237.1272.

### 2-benzyl-1-(4-ethylphenyl)prop-2-en-1-one (3h)

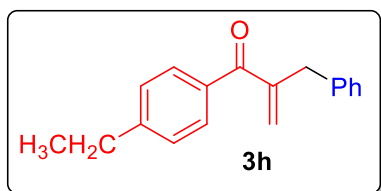

This compound was prepared by the general procedure described above and was obtained as yellow oil (21.1 mg, 84%). Rf (PE:EtOAc

= 10:1): 0.63;  $^1\text{H}$  NMR (600 MHz,  $\text{CDCl}_3$ )  $\delta$  7.67 (d,  $J = 8.0$  Hz, 2H), 7.29 (t,  $J = 7.5$  Hz, 2H), 7.26 – 7.23 (m, 4H), 7.20 (t,  $J = 7.2$  Hz, 1H), 5.71 (s, 1H), 5.66 (s, 1H), 3.80 (s, 2H), 2.69 (q,  $J = 7.6$  Hz, 2H), 1.25 (t,  $J = 7.6$  Hz, 3H);  $^{13}\text{C}$  NMR (151 MHz,  $\text{CDCl}_3$ )  $\delta$  197.4, 149.2, 147.7, 138.7, 135.1, 129.8, 129.2, 128.5, 127.7, 126.3, 126.1, 38.5, 28.9, 15.2; HRMS (ESI)  $m/z$  calculated for  $\text{C}_{18}\text{H}_{19}\text{O}$   $[\text{M}+\text{H}]^+$ : 251.1430, found 251.1429.

### 2-benzyl-1-(4-methoxyphenyl)prop-2-en-1-one (3i)

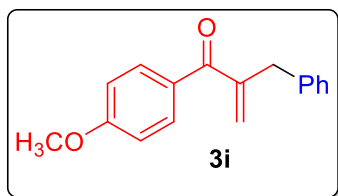

This compound was prepared by the general procedure described above and was obtained as colorless oil (14.9 mg, 59%). Rf (PE:EtOAc =

10:1): 0.38;  $^1\text{H}$  NMR (600 MHz,  $\text{CDCl}_3$ )  $\delta$  7.78 (d,  $J = 8.6$  Hz, 2H), 7.31 (t,  $J = 7.5$  Hz, 2H), 7.27 (t,  $J = 5.6$  Hz, 2H), 7.22 (t,  $J = 7.2$  Hz, 1H), 6.92

(d,  $J = 8.7$  Hz, 2H), 5.68 (s, 1H), 5.62 (s, 1H), 3.87 (s, 3H), 3.81 (s, 2H);  $^{13}\text{C}$  NMR (151 MHz,  $\text{CDCl}_3$ )  $\delta$  196.4, 163.1, 147.7, 138.7, 131.9, 130.1, 129.1, 128.5, 126.3, 124.7, 113.4, 55.4, 38.8; HRMS (ESI)  $m/z$  calculated for  $\text{C}_{17}\text{H}_{17}\text{O}_2$   $[\text{M}+\text{H}]^+$ : 253.1223, found 253.1222.

### 2-benzyl-1-(4-nitrophenyl)prop-2-en-1-one (3j)

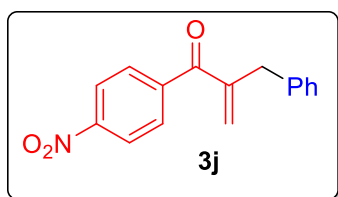

This compound was prepared by the general procedure described above and was obtained as yellow oil (17.5 mg, 65%). Rf (PE:EtOAc = 10:1): 0.37;  $^1\text{H}$  NMR (600 MHz,  $\text{CDCl}_3$ )  $\delta$  8.27 (d,  $J = 8.5$  Hz, 2H), 7.82 (d,  $J = 8.5$  Hz, 2H), 7.32 (t,  $J = 7.5$  Hz, 2H), 7.27 – 7.22 (m, 3H), 5.90 (s, 1H), 5.70 (s, 1H), 3.81 (s, 2H);  $^{13}\text{C}$  NMR (151 MHz,  $\text{CDCl}_3$ )  $\delta$  195.7, 149.7, 147.4, 143.1, 138.1, 130.1, 129.1, 128.9, 128.7, 126.6, 123.4, 37.9; HRMS (ESI)  $m/z$  calculated for  $\text{C}_{16}\text{H}_{13}\text{NO}_3\text{Na}$   $[\text{M}+\text{Na}]^+$ : 289.0709, found 289.0716.

### 2-benzyl-1-(4-pentylphenyl)prop-2-en-1-one (3k)

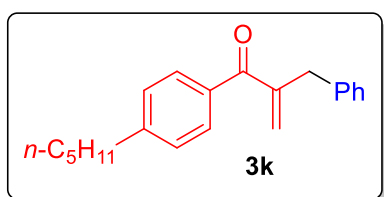

This compound was prepared by the general procedure described above and was obtained as yellow oil (20.4 mg, 70%). Rf (PE:EtOAc = 10:1): 0.70;  $^1\text{H}$  NMR (600 MHz,  $\text{CDCl}_3$ )  $\delta$  7.66 (d,  $J = 8.1$  Hz, 2H), 7.29 (t,  $J = 7.5$  Hz, 2H), 7.26 – 7.25 (m, 2H), 7.22 – 7.19 (m, 3H), 5.71 (s, 1H), 5.66 (s, 1H), 3.80 (s, 2H), 2.64 (t,  $J = 7.7$  Hz, 2H), 1.65 – 1.60 (m, 2H), 1.37 – 1.30 (m, 4H), 0.89 (t,  $J = 6.9$  Hz, 3H);  $^{13}\text{C}$  NMR (151 MHz,

CDCl<sub>3</sub>)  $\delta$  197.4, 148.0, 147.7, 138.7, 135.1, 129.7, 129.2, 128.5, 128.2, 126.3, 126.1, 38.5, 35.9, 31.4, 30.8, 22.5, 14.0; HRMS (ESI)  $m/z$  calculated for C<sub>21</sub>H<sub>25</sub>O [M+H]<sup>+</sup>: 293.1900, found 293.1898.

### 2-benzyl-1-(4-ethoxyphenyl)prop-2-en-1-one (3l)

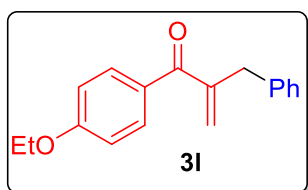

This compound was prepared by the general procedure described above and was obtained as yellow oil (19.7 mg, 74%). R<sub>f</sub> (PE:EtOAc = 10:1):

0.45; <sup>1</sup>H NMR (600 MHz, CDCl<sub>3</sub>)  $\delta$  7.77 (d,  $J$  = 8.8 Hz, 2H), 7.31 (t,  $J$  = 7.5 Hz, 2H), 7.27 (t,  $J$  = 6.0 Hz, 2H), 7.22 (t,  $J$  = 7.2 Hz, 1H), 6.90 (d,  $J$  = 8.8 Hz, 2H), 5.67 (s, 1H), 5.61 (s, 1H), 4.10 (q,  $J$  = 7.0 Hz, 2H), 3.81 (s, 2H), 1.45 (t,  $J$  = 7.0 Hz, 3H); <sup>13</sup>C NMR (151 MHz, CDCl<sub>3</sub>)  $\delta$  196.5, 162.6, 147.7, 138.7, 132.0, 129.9, 129.1, 128.5, 126.3, 124.7, 113.9, 63.7, 38.8, 14.7; HRMS (ESI)  $m/z$  calculated for C<sub>18</sub>H<sub>19</sub>O<sub>2</sub> [M+H]<sup>+</sup>: 267.1380, found 267.1378.

### methyl 4-(2-benzylacryloyl)benzoate (3m)

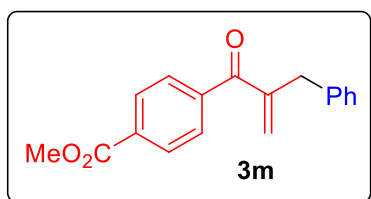

This compound was prepared by the general procedure described above and was obtained as white solid (17.4 mg, 62%). R<sub>f</sub> (PE:EtOAc

= 10:1): 0.30; m.p. 77.1-78.9 °C; <sup>1</sup>H NMR (600 MHz, CDCl<sub>3</sub>)  $\delta$  8.08 (d,  $J$  = 8.1 Hz, 2H), 7.73 (d,  $J$  = 8.1 Hz, 2H), 7.31 (t,  $J$  = 7.4 Hz, 2H), 7.26 – 7.21 (m, 3H), 5.83 (s, 1H), 5.69 (s, 1H), 3.94 (s, 3H), 3.80 (s, 2H); <sup>13</sup>C NMR (151 MHz, CDCl<sub>3</sub>)  $\delta$  196.9, 166.3, 147.5, 141.5, 138.4, 133.0,

129.4, 129.2, 129.1, 128.6, 128.2, 126.5, 52.4, 38.0; HRMS (ESI)  $m/z$  calculated for  $C_{18}H_{17}O_3$   $[M+H]^+$ : 281.1172, found 281.1171.

### 1-([1,1'-biphenyl]-4-yl)-2-benzylprop-2-en-1-one (3n)

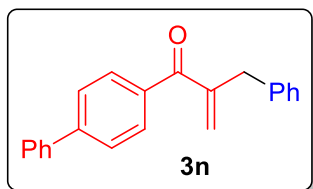

This compound was prepared by the general procedure described above and was obtained as white solid (26.2 mg, 88%). R<sub>f</sub> (PE:EtOAc = 10:1): 0.49; m.p. 87.0-87.7 °C; <sup>1</sup>H NMR (600 MHz, CDCl<sub>3</sub>) δ 7.82 (d,  $J$  = 8.2 Hz, 2H), 7.63 (dd,  $J$  = 16.0, 7.9 Hz, 4H), 7.47 (t,  $J$  = 7.6 Hz, 2H), 7.40 (t,  $J$  = 7.3 Hz, 1H), 7.33 – 7.28 (m, 4H), 7.23 (t,  $J$  = 7.1 Hz, 1H), 5.78 (s, 1H), 5.74 (s, 1H), 3.84 (s, 2H); <sup>13</sup>C NMR (151 MHz, CDCl<sub>3</sub>) δ 197.2, 147.7, 145.0, 140.0, 138.7, 136.3, 130.1, 129.2, 128.9, 128.5, 128.1, 127.2, 126.9, 126.5, 126.4, 38.5; HRMS (ESI)  $m/z$  calculated for  $C_{22}H_{19}O$   $[M+H]^+$ : 299.1430, found 299.1428.

### 2-benzyl-1-(naphthalen-2-yl)prop-2-en-1-one (3o)

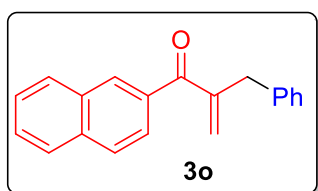

This compound was prepared by the general procedure described above and was obtained as pale yellow oil (22.4 mg, 82%). R<sub>f</sub> (PE:EtOAc = 10:1): 0.51; <sup>1</sup>H NMR (600 MHz, CDCl<sub>3</sub>) δ 8.22 (s, 1H), 7.91 (d,  $J$  = 8.1 Hz, 1H), 7.88 (dd,  $J$  = 8.2, 5.2 Hz, 2H), 7.85 (dd,  $J$  = 8.5, 1.5 Hz, 1H), 7.60 – 7.57 (m, 1H), 7.55 – 7.53 (m, 1H), 7.34 – 7.31 (m, 4H), 7.23 (ddd,  $J$  = 8.5, 6.1, 2.1 Hz, 1H), 5.80 (s, 1H), 5.76 (s, 1H), 3.87 (s, 2H); <sup>13</sup>C NMR (151 MHz, CDCl<sub>3</sub>) δ 197.6, 147.8, 138.7, 135.2, 134.9, 132.1,

131.0, 129.3, 129.2, 128.5, 128.2, 128.1, 127.7, 126.7, 126.7, 126.4, 125.4, 38.5; HRMS (ESI)  $m/z$  calculated for  $C_{20}H_{17}O$   $[M+H]^+$ : 273.1274, found 273.1272.

### 2-benzyl-1-(thiophen-2-yl)prop-2-en-1-one (3p)

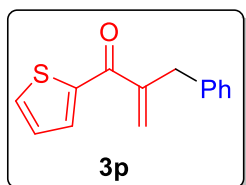

This compound was prepared by the general procedure described above and was obtained as white solid (20.5 mg, 90%). R<sub>f</sub> (PE:EtOAc = 10:1): 0.49; m.p.

63.2-65.4 °C; <sup>1</sup>H NMR (600 MHz, CDCl<sub>3</sub>) δ 7.65 (ddd,  $J$  = 4.8, 4.3, 1.1 Hz, 2H), 7.30 (t,  $J$  = 7.5 Hz, 2H), 7.26 (t,  $J$  = 7.9 Hz, 2H), 7.22 (t,  $J$  = 7.3 Hz, 1H), 7.11 (dd,  $J$  = 4.9, 3.8 Hz, 1H), 5.90 (s, 1H), 5.65 (s, 1H), 3.80 (s, 2H); <sup>13</sup>C NMR (151 MHz, CDCl<sub>3</sub>) δ 189.1, 147.9, 143.4, 138.3, 134.0, 133.9, 129.1, 128.5, 127.8, 126.4, 124.2, 38.6; HRMS (ESI)  $m/z$  calculated for  $C_{14}H_{13}OS$   $[M+H]^+$ : 229.0682, found 229.0681.

### 2-benzyl-1-(5-chlorothiophen-2-yl)prop-2-en-1-one (3q)

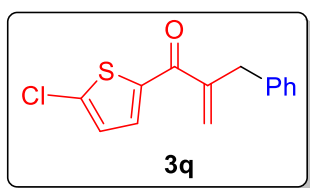

This compound was prepared by the general procedure described above and was obtained as white solid (14.9 mg, 57%). R<sub>f</sub> (PE:EtOAc = 10:1):

0.67; m.p. 63.9-65.8 °C; <sup>1</sup>H NMR (600 MHz, CDCl<sub>3</sub>) δ 7.41 (d,  $J$  = 4.0 Hz, 1H), 7.29 (t,  $J$  = 7.5 Hz, 2H), 7.22 – 7.20 (m, 3H), 6.92 (d,  $J$  = 4.0 Hz, 1H), 5.83 (s, 1H), 5.63 (s, 1H), 3.75 (s, 2H); <sup>13</sup>C NMR (151 MHz, CDCl<sub>3</sub>) δ 188.1, 147.2, 142.0, 139.9, 138.1, 133.4, 129.1, 128.5, 127.3, 126.5, 124.1, 38.6; HRMS (ESI)  $m/z$  calculated for  $C_{14}H_{12}ClOS$   $[M+H]^+$ :



263.0292, found 263.0290.

### 2-benzyl-1-(5-bromothiophen-2-yl)prop-2-en-1-one (3r)

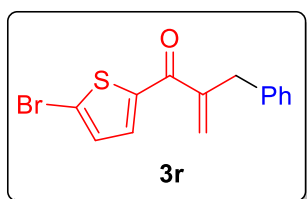

This compound was prepared by the general procedure described above and was obtained as yellow solid (15.9 mg, 52%). Rf (PE:EtOAc = 10:1): 0.54; m.p. 87.4-87.9 °C; <sup>1</sup>H NMR (600 MHz, CDCl<sub>3</sub>) δ 7.36 (d, *J* = 4.0 Hz, 1H), 7.29 (t, *J* = 7.5 Hz, 2H), 7.22 – 7.19 (m, 3H), 7.06 (d, *J* = 4.0 Hz, 1H), 5.83 (s, 1H), 5.63 (s, 1H), 3.75 (s, 2H); <sup>13</sup>C NMR (151 MHz, CDCl<sub>3</sub>) δ 187.9, 147.3, 144.8, 138.1, 134.0, 131.0, 129.1, 128.5, 126.5, 124.2, 123.0, 38.6; HRMS (ESI) *m/z* calculated for C<sub>14</sub>H<sub>12</sub>BrOS [M+H]<sup>+</sup>: 306.9787, found 306.9786.

### 2-benzyl-1-(furan-2-yl)prop-2-en-1-one (3s)

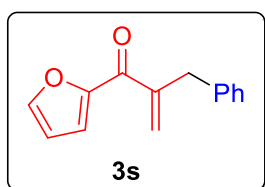

This compound was prepared by the general procedure described above and was obtained as yellow oil (15.3 mg, 72%). Rf (PE:EtOAc = 10:1): 0.35; <sup>1</sup>H NMR (600 MHz, CDCl<sub>3</sub>) δ 7.62 (s, 1H), 7.28 (dd, *J* = 14.4, 7.0 Hz, 2H), 7.21 (dd, *J* = 16.4, 7.6 Hz, 3H), 7.12 (d, *J* = 3.5 Hz, 1H), 6.51 – 6.50 (m, 1H), 6.05 (s, 1H), 5.65 (s, 1H), 3.77 (s, 2H); <sup>13</sup>C NMR (151 MHz, CDCl<sub>3</sub>) δ 183.5, 152.0, 147.3, 147.0, 138.4, 129.2, 128.5, 126.4, 125.0, 119.9, 111.9, 38.2; HRMS (ESI) *m/z* calculated for C<sub>14</sub>H<sub>13</sub>O<sub>2</sub> [M+H]<sup>+</sup>: 213.0910, found 213.0909.

### 2-benzyl-1-(2,6-dichlorophenyl)prop-2-en-1-one (3t)

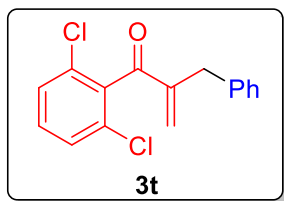

This compound was prepared by the general procedure described above and was obtained as colorless oil (17.1 mg, 59%). Rf (PE:EtOAc = 10:1):

0.52;  $^1\text{H}$  NMR (600 MHz,  $\text{CDCl}_3$ )  $\delta$  7.32 (d,  $J = 10.4$  Hz, 4H), 7.25 – 7.23 (m, 3H), 7.21 (s, 1H), 5.86 (s, 1H), 5.72 (s, 1H), 3.76 (s, 2H);  $^{13}\text{C}$  NMR (151 MHz,  $\text{CDCl}_3$ )  $\delta$  194.9, 147.9, 139.9, 138.3, 132.7, 131.8, 131.1, 130.8, 129.4, 129.3, 128.5, 128.5, 126.5, 36.3; HRMS (ESI)  $m/z$  calculated for  $\text{C}_{16}\text{H}_{12}\text{Cl}_2\text{ONa}$   $[\text{M}+\text{Na}]^+$ : 313.0157, found 313.0162.

### 1-(benzofuran-2-yl)-2-benzylprop-2-en-1-one (3u)

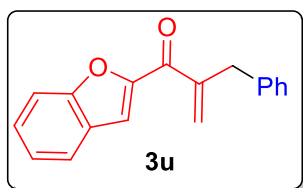

This compound was prepared by the general procedure described above and was obtained as white solid (11.6 mg, 44%). Rf (PE:EtOAc = 10:1):

0.55; m.p. 94.5-96.1 °C;  $^1\text{H}$  NMR (600 MHz,  $\text{CDCl}_3$ )  $\delta$  7.69 (d,  $J = 7.9$  Hz, 1H), 7.59 (d,  $J = 8.4$  Hz, 1H), 7.47 (t,  $J = 7.8$  Hz, 1H), 7.43 (s, 1H), 7.32 – 7.28 (m, 3H), 7.25 (d,  $J = 7.5$  Hz, 2H), 7.21 (t,  $J = 7.2$  Hz, 1H), 6.18 (s, 1H), 5.77 (s, 1H), 3.83 (s, 2H);  $^{13}\text{C}$  NMR (151 MHz,  $\text{CDCl}_3$ )  $\delta$  185.3, 156.0, 152.0, 147.5, 138.3, 129.2, 128.5, 128.3, 126.8, 126.5, 125.8, 123.9, 123.2, 115.8, 112.5, 38.3; HRMS (ESI)  $m/z$  calculated for  $\text{C}_{18}\text{H}_{15}\text{O}_2$   $[\text{M}+\text{H}]^+$ : 263.1067, found 263.1065.

### methyl 4-allylbenzoate (3v)<sup>7</sup>

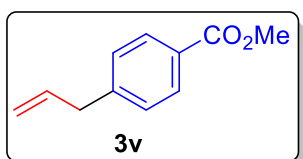

This compound was prepared by the general procedure described above in 0.2 mmol scale and

was obtained as colorless oil (17.5 mg, 50%). Rf (PE:EtOAc = 10:1): 0.7;  $^1\text{H}$  NMR (600 MHz,  $\text{CDCl}_3$ )  $\delta$  7.96 (d,  $J = 7.6$  Hz, 2H), 7.25 (d,  $J = 7.3$  Hz, 2H), 5.98 – 5.92 (m, 1H), 5.11 – 5.08 (m, 2H), 3.90 (s, 3H), 3.43 (d,  $J = 6.6$  Hz, 2H);  $^{13}\text{C}$  NMR (151 MHz,  $\text{CDCl}_3$ )  $\delta$  167.1, 145.5, 136.4, 129.7, 128.6, 128.1, 116.6, 52.0, 40.1; HRMS (ESI)  $m/z$  calculated for  $\text{C}_{11}\text{H}_{13}\text{O}_2$   $[\text{M}+\text{H}]^+$ : 177.0910, found 177.0914.

#### methyl 4-cinnamylbenzoate (**3w**)<sup>8</sup>

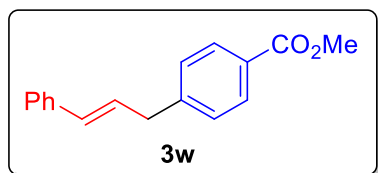

This compound was prepared by the general procedure described above and was obtained as colorless oil (14.1 mg, 56%). Rf

(PE:EtOAc = 10:1): 0.45;  $^1\text{H}$  NMR (600 MHz,  $\text{CDCl}_3$ )  $\delta$  7.99 (d,  $J = 8.2$  Hz, 2H), 7.36 (d,  $J = 7.3$  Hz, 2H), 7.32 – 7.29 (m, 4H), 7.22 (t,  $J = 7.3$  Hz, 1H), 6.47 (d,  $J = 15.8$  Hz, 1H), 6.34 (dt,  $J = 15.7, 6.9$  Hz, 1H), 3.91 (s, 3H), 3.60 (d,  $J = 6.8$  Hz, 2H);  $^{13}\text{C}$  NMR (151 MHz,  $\text{CDCl}_3$ )  $\delta$  167.1, 145.6, 137.2, 131.8, 129.8, 128.7, 128.5, 128.2, 128.0, 127.3, 126.1, 52.0, 39.3; HRMS (ESI)  $m/z$  calculated for  $\text{C}_{17}\text{H}_{16}\text{O}_2\text{K}$   $[\text{M}+\text{K}]^+$ : 291.0782, found 291.0781.

#### methyl (E)-4-(4-methoxy-4-oxobut-2-en-1-yl)benzoate (**3x**)<sup>9</sup>

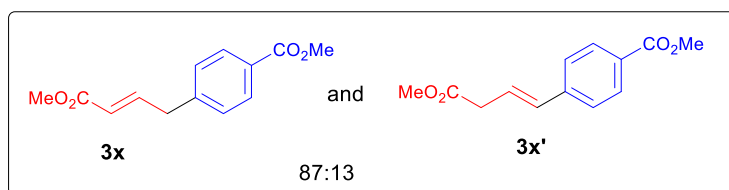

This compound was prepared by the general procedure

described above and was obtained as colorless oil (14.9 mg) of

inseparable mixture (**3x/3x'** = 87:13) in 64% yield. R<sub>f</sub> (PE:EtOAc = 5:1): 0.40; <sup>1</sup>H and <sup>13</sup>C NMR are described for the **3x** isomer: <sup>1</sup>H NMR (600 MHz, CDCl<sub>3</sub>) δ 7.99 (d, *J* = 8.2 Hz, 2H), 7.24 (d, *J* = 8.2 Hz, 2H), 7.09 (dt, *J* = 15.6, 6.8 Hz, 1H), 5.83 (d, *J* = 15.6 Hz, 1H), 3.91 (s, 3H), 3.73 (s, 3H), 3.58 (d, *J* = 6.7 Hz, 2H); <sup>13</sup>C NMR (151 MHz, CDCl<sub>3</sub>) δ 166.9, 166.7, 146.3, 143.0, 130.0, 128.8, 128.7, 122.6, 52.1, 51.6, 38.3; HRMS (ESI) *m/z* calculated for C<sub>13</sub>H<sub>13</sub>O<sub>4</sub> [M-H]<sup>-</sup>: 233.0808, found 233.0818.

#### 1-phenyl-2-(phenylmethyl-d<sub>2</sub>)prop-2-en-1-one-3,3-d<sub>2</sub> (**2a-d<sub>4</sub>**)

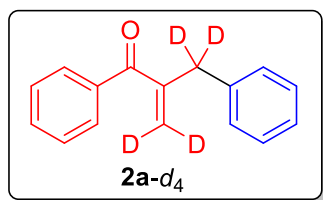

This compound was prepared by the general procedure described above and was obtained as yellow oil (42.2 mg, 75%). R<sub>f</sub> (PE:EtOAc = 15:1):

0.49; <sup>1</sup>H NMR (600 MHz, CDCl<sub>3</sub>) δ 7.73 (d, *J* = 7.9 Hz, 2H), 7.53 (t, *J* = 7.4 Hz, 1H), 7.42 (t, *J* = 7.6 Hz, 2H), 7.32 (t, *J* = 7.6 Hz, 2H), 7.29 (d, *J* = 7.3 Hz, 2H), 7.23 (t, *J* = 7.0 Hz, 1H); <sup>13</sup>C NMR (151 MHz, CDCl<sub>3</sub>) δ 197.6, 147.3, 138.6, 137.6, 132.1, 129.4, 129.1, 128.5, 128.1, 126.3, 29.6; HRMS (ESI) *m/z* calculated for C<sub>16</sub>H<sub>11</sub>D<sub>4</sub>O [M+H]<sup>+</sup>: 227.1368, found 227.1368.

#### methyl 4-(2-benzoylallyl)benzoate (**5a**)

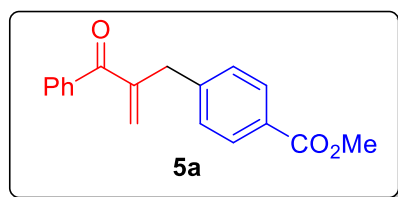

This compound was prepared by the general procedure described above and was obtained as yellow oil (25.2 mg, 90%). R<sub>f</sub> (PE:EtOAc

= 10:1): 0.38; <sup>1</sup>H NMR (600 MHz, CDCl<sub>3</sub>) δ 7.97 (d, *J* = 8.2 Hz, 2H),

7.69 (d,  $J = 7.4$  Hz, 2H), 7.52 (t,  $J = 7.4$  Hz, 1H), 7.41 (t,  $J = 7.7$  Hz, 2H), 7.33 (d,  $J = 8.1$  Hz, 2H), 5.80 (s, 1H), 5.73 (s, 1H), 3.89 (s, 3H), 3.85 (s, 2H);  $^{13}\text{C}$  NMR (151 MHz,  $\text{CDCl}_3$ )  $\delta$  197.2, 167.0, 146.8, 144.2, 137.5, 132.3, 129.9, 129.4, 129.1, 128.4, 128.2, 127.5, 52.0, 38.4; HRMS (ESI)  $m/z$  calculated for  $\text{C}_{18}\text{H}_{16}\text{O}_3\text{Na}$   $[\text{M}+\text{Na}]^+$ : 303.0992, found 303.0987.

### 2-(4-bromobenzyl)-1-phenylprop-2-en-1-one (5b)<sup>10</sup>

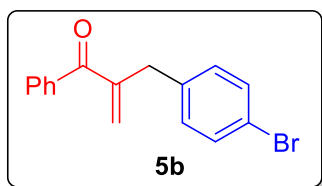

This compound was prepared by the general procedure described above and was obtained as yellow oil (22.0 mg, 73%). Rf (PE:EtOAc = 10:1):

0.60;  $^1\text{H}$  NMR (600 MHz,  $\text{CDCl}_3$ )  $\delta$  7.69 (d,  $J = 7.9$  Hz, 2H), 7.53 (t,  $J = 7.4$  Hz, 1H), 7.42 (dd,  $J = 7.5, 6.0$  Hz, 4H), 7.14 (d,  $J = 8.2$  Hz, 2H), 5.78 (s, 1H), 5.71 (s, 1H), 3.75 (s, 2H);  $^{13}\text{C}$  NMR (151 MHz,  $\text{CDCl}_3$ )  $\delta$  197.3, 147.0, 137.7, 137.5, 132.3, 131.6, 130.9, 129.4, 128.2, 127.3, 120.3, 37.8; HRMS (ESI)  $m/z$  calculated for  $\text{C}_{16}\text{H}_{14}\text{BrO}$   $[\text{M}+\text{H}]^+$ : 301.0223, found 301.0221.

### 2-(4-chlorobenzyl)-1-phenylprop-2-en-1-one (5c)

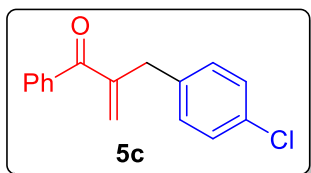

This compound was prepared by the general procedure described above and was obtained as yellow oil (20.3 mg, 79%). Rf (PE:EtOAc = 20:1):

0.32;  $^1\text{H}$  NMR (600 MHz,  $\text{CDCl}_3$ )  $\delta$  7.70 (d,  $J = 7.2$  Hz, 2H), 7.53 (t,  $J = 7.3$  Hz, 1H), 7.42 (t,  $J = 7.3$  Hz, 2H), 7.27 (d,  $J = 7.2$  Hz, 2H), 7.20 (d,  $J = 7.6$  Hz, 2H), 5.79 (s, 1H), 5.71 (s, 1H), 3.77 (s, 2H);  $^{13}\text{C}$  NMR (151

MHz, CDCl<sub>3</sub>)  $\delta$  197.4, 147.1, 137.5, 137.1, 132.3, 132.2, 130.5, 129.4, 128.6, 128.2, 127.3, 37.7; HRMS (ESI)  $m/z$  calculated for C<sub>16</sub>H<sub>14</sub>ClO [M+H]<sup>+</sup>: 257.0728, found 257.0727.

### 2-(4-fluorobenzyl)-1-phenylprop-2-en-1-one (5d)<sup>11</sup>

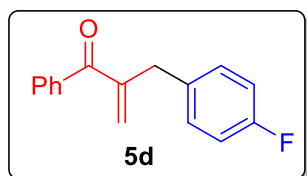

This compound was prepared by the general procedure described above and was obtained as yellow oil (17.2 mg, 71%). R<sub>f</sub> (PE:EtOAc = 20:1):

0.33; <sup>1</sup>H NMR (600 MHz, CDCl<sub>3</sub>)  $\delta$  7.71 (d,  $J$  = 7.8 Hz, 2H), 7.53 (t,  $J$  = 7.4 Hz, 1H), 7.42 (t,  $J$  = 7.1 Hz, 2H), 7.23 (t,  $J$  = 6.1 Hz, 2H), 6.99 (t,  $J$  = 8.0 Hz, 2H), 5.78 (s, 1H), 5.70 (s, 1H), 3.78 (s, 2H); <sup>13</sup>C NMR (151 MHz, CDCl<sub>3</sub>)  $\delta$  197.5, 161.5 (d,  $J$  = 244.3 Hz), 147.3, 137.5, 134.2 (d,  $J$  = 3.1 Hz), 132.3, 130.5 (d,  $J$  = 7.9 Hz), 129.4, 128.1, 127.1, 115.2 (d,  $J$  = 21.3 Hz), 37.5; HRMS (ESI)  $m/z$  calculated for C<sub>16</sub>H<sub>12</sub>FO [M-H]<sup>-</sup>: 239.0867, found 239.0867.

### 4-(2-benzoylallyl)benzonitrile (5e)

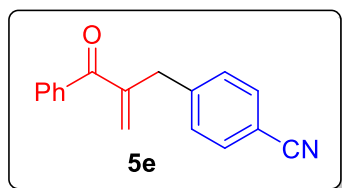

This compound was prepared by the general procedure described above and was obtained as colorless oil (10.9 mg, 44%). R<sub>f</sub> (PE:EtOAc =

10:1): 0.33; <sup>1</sup>H NMR (600 MHz, CDCl<sub>3</sub>)  $\delta$  7.68 (d,  $J$  = 8.0 Hz, 2H), 7.59 (d,  $J$  = 8.1 Hz, 2H), 7.54 (t,  $J$  = 7.3 Hz, 1H), 7.43 (t,  $J$  = 7.7 Hz, 2H), 7.38 (d,  $J$  = 8.1 Hz, 2H), 5.85 (s, 1H), 5.78 (s, 1H), 3.85 (s, 2H); <sup>13</sup>C NMR (151 MHz, CDCl<sub>3</sub>)  $\delta$  196.9, 146.1, 144.5, 137.3, 132.5, 132.3, 129.8,

129.4, 128.3, 128.2, 118.9, 110.4, 38.5; HRMS (ESI)  $m/z$  calculated for  $C_{17}H_{14}NO$   $[M+H]^+$ : 248.1070, found 248.1070.

### 2-(3-acetylbenzyl)-1-phenylprop-2-en-1-one (5f)

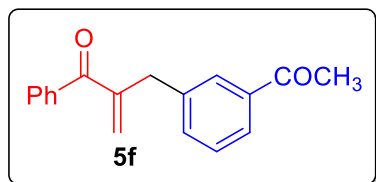

This compound was prepared by the general procedure described above and was obtained as yellow oil (18.1 mg, 68%). Rf (PE:EtOAc

= 10:1): 0.25;  $^1H$  NMR (600 MHz,  $CDCl_3$ )  $\delta$  7.87 (s, 1H), 7.80 (d,  $J = 7.7$  Hz, 1H), 7.70 (d,  $J = 7.5$  Hz, 2H), 7.52 (t,  $J = 7.4$  Hz, 1H), 7.48 (d,  $J = 7.6$  Hz, 1H), 7.40 (dt,  $J = 12.3, 7.7$  Hz, 3H), 5.81 (s, 1H), 5.74 (s, 1H), 3.86 (s, 2H), 2.59 (s, 3H);  $^{13}C$  NMR (151 MHz,  $CDCl_3$ )  $\delta$  198.1, 197.3, 146.9, 139.3, 137.5, 137.4, 134.0, 132.3, 129.4, 128.8, 128.8, 128.2, 127.6, 126.6, 38.2, 26.7; HRMS (ESI)  $m/z$  calculated for  $C_{18}H_{17}O_2$   $[M+H]^+$ : 265.1223, found 265.1222.

### 3-(2-benzoylallyl)benzaldehyde (5g)

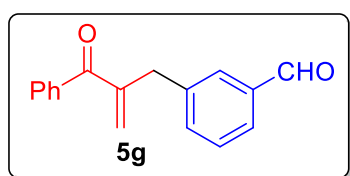

This compound was prepared by the general procedure described above and was obtained as yellow oil (13.1 mg, 52%). Rf (PE:EtOAc =

10:1): 0.33;  $^1H$  NMR (600 MHz,  $CDCl_3$ )  $\delta$  10.00 (s, 1H), 7.79 (s, 1H), 7.73 (d,  $J = 7.5$  Hz, 1H), 7.71 – 7.69 (m, 2H), 7.54 (dd,  $J = 18.2, 7.5$  Hz, 2H), 7.47 (t,  $J = 7.6$  Hz, 1H), 7.42 (t,  $J = 7.7$  Hz, 2H), 5.83 (s, 1H), 5.76 (s, 1H), 3.88 (s, 2H);  $^{13}C$  NMR (151 MHz,  $CDCl_3$ )  $\delta$  197.2, 192.3, 146.7, 140.0, 137.5, 136.7, 135.4, 132.3, 130.0, 129.4, 129.2, 128.3, 128.1,

127.8, 38.1; HRMS (ESI)  $m/z$  calculated for  $C_{17}H_{15}O_2$   $[M+H]^+$ : 251.1067, found 251.1065.

### 2-(3-methylbenzyl)-1-phenylprop-2-en-1-one (5h)

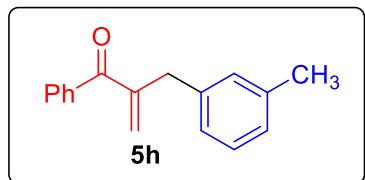

This compound was prepared by the general procedure described above and was obtained as yellow oil (14.6 mg, 62%). Rf (PE:EtOAc =

10:1): 0.65;  $^1H$  NMR (600 MHz,  $CDCl_3$ )  $\delta$  7.72 (d,  $J = 7.6$  Hz, 2H), 7.52 (t,  $J = 7.4$  Hz, 1H), 7.42 (t,  $J = 7.7$  Hz, 2H), 7.19 (t,  $J = 7.5$  Hz, 1H), 7.08 – 7.02 (m, 3H), 5.76 (s, 1H), 5.68 (s, 1H), 3.77 (s, 2H), 2.33 (s, 3H);  $^{13}C$  NMR (151 MHz,  $CDCl_3$ )  $\delta$  197.7, 147.7, 138.6, 138.1, 137.7, 132.1, 130.0, 129.5, 128.4, 128.1, 127.1, 127.0, 126.1, 38.2, 21.4; HRMS (ESI)  $m/z$  calculated for  $C_{17}H_{17}O$   $[M+H]^+$ : 237.1274, found 237.1272.

### 2-(3-chlorobenzyl)-1-phenylprop-2-en-1-one (5i)<sup>11</sup>

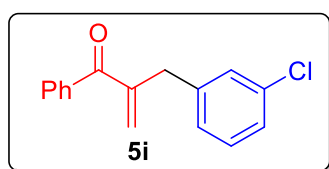

This compound was prepared by the general procedure described above and was obtained as yellow oil (18.7 mg, 73%). Rf (PE:EtOAc =

20:1): 0.32;  $^1H$  NMR (600 MHz,  $CDCl_3$ )  $\delta$  7.71 (d,  $J = 7.4$  Hz, 2H), 7.53 (t,  $J = 7.2$  Hz, 1H), 7.42 (t,  $J = 7.1$  Hz, 2H), 7.27 – 7.25 (m, 1H), 7.24 – 7.21 (m, 1H), 7.20 – 7.18 (m, 1H), 7.15 (d,  $J = 7.1$  Hz, 1H), 5.80 (s, 1H), 5.73 (s, 1H), 3.77 (s, 2H);  $^{13}C$  NMR (151 MHz,  $CDCl_3$ )  $\delta$  197.3, 146.8, 140.7, 137.5, 134.2, 132.3, 129.7, 129.4, 129.2, 128.2, 127.7, 127.3, 126.6, 37.9; HRMS (ESI)  $m/z$  calculated for  $C_{16}H_{14}ClO$   $[M+H]^+$ :



257.0728, found 257.0726.

### 2-(2,4-dichlorobenzyl)-1-phenylprop-2-en-1-one (5j)

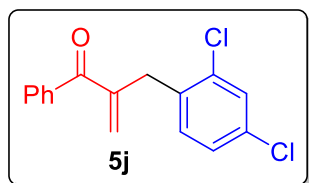

This compound was prepared by the general procedure described above and was obtained as yellow oil (14.5 mg, 50%). R<sub>f</sub> (PE:EtOAc = 20:1):

0.34; <sup>1</sup>H NMR (600 MHz, CDCl<sub>3</sub>) δ 7.74 (d, *J* = 7.7 Hz, 2H), 7.54 (t, *J* = 7.1 Hz, 1H), 7.44 – 7.41 (m, 3H), 7.25 (d, *J* = 9.2 Hz, 1H), 7.20 (d, *J* = 8.2 Hz, 1H), 5.74 (s, 1H), 5.67 (s, 1H), 3.88 (s, 2H); <sup>13</sup>C NMR (151 MHz, CDCl<sub>3</sub>) δ 197.3, 145.1, 137.4, 135.1, 135.0, 133.0, 132.4, 129.5, 129.4, 128.2, 127.7, 127.2, 35.3; HRMS (ESI) *m/z* calculated for C<sub>16</sub>H<sub>13</sub>Cl<sub>2</sub>O [M+H]<sup>+</sup>: 291.0338, found 291.0337.

### 2-(2,6-dimethylbenzyl)-1-phenylprop-2-en-1-one (5k)

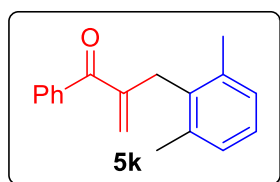

This compound was prepared by the general procedure described above and was obtained as colorless oil in (7.2 mg, 29%). R<sub>f</sub> (PE:EtOAc =

10:1): 0.68; <sup>1</sup>H NMR (600 MHz, CDCl<sub>3</sub>) δ 7.78 (d, *J* = 7.3 Hz, 2H), 7.55 (t, *J* = 7.4 Hz, 1H), 7.45 (t, *J* = 7.7 Hz, 2H), 7.11 – 7.06 (m, 3H), 5.60 (s, 1H), 5.26 (s, 1H), 3.79 (s, 2H), 2.30 (s, 6H); <sup>13</sup>C NMR (151 MHz, CDCl<sub>3</sub>) δ 198.3, 145.4, 137.8, 137.2, 135.2, 132.3, 129.5, 128.2, 128.1, 126.5, 125.7, 31.4, 19.9; HRMS (ESI) *m/z* calculated for C<sub>18</sub>H<sub>19</sub>O [M+H]<sup>+</sup>: 251.1430, found 251.1428.

### 1-phenyl-2-(2,4,6-trimethylbenzyl)prop-2-en-1-one (5l)

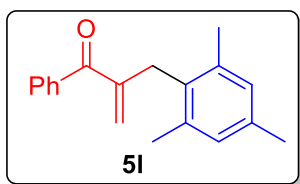

This compound was prepared by the general procedure described above and was obtained as yellow oil (10.8 mg, 41%). Rf (PE:EtOAc =10:1):

0.68;  $^1\text{H NMR}$  (600 MHz,  $\text{CDCl}_3$ )  $\delta$  7.77 (d,  $J = 8.0$  Hz, 2H), 7.55 (dd,  $J = 10.9, 3.8$  Hz, 1H), 7.45 (t,  $J = 7.6$  Hz, 2H), 6.90 (s, 2H), 5.59 (s, 1H), 5.28 (s, 1H), 3.75 (s, 2H), 2.29 (s, 3H), 2.26 (s, 6H);  $^{13}\text{C NMR}$  (151 MHz,  $\text{CDCl}_3$ )  $\delta$  198.4, 145.7, 137.8, 137.0, 135.9, 132.2, 132.0, 129.5, 128.9, 128.2, 125.7, 31.1, 20.9, 19.8; HRMS (ESI)  $m/z$  calculated for  $\text{C}_{19}\text{H}_{21}\text{O}$   $[\text{M}+\text{H}]^+$ : 265.1587, found 265.1586.

### 2-(naphthalen-1-ylmethyl)-1-phenylprop-2-en-1-one (5m)

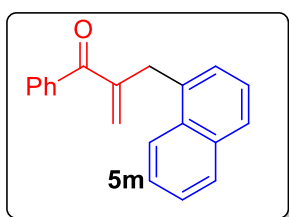

This compound was prepared by the general procedure described above and was obtained as yellow oil (14.1 mg, 52%). Rf (PE:EtOAc = 10:1):

0.58;  $^1\text{H NMR}$  (600 MHz,  $\text{CDCl}_3$ )  $\delta$  8.00 (d,  $J = 8.2$  Hz, 1H), 7.88 (d,  $J = 7.9$  Hz, 1H), 7.78 (t,  $J = 7.4$  Hz, 3H), 7.55 – 7.48 (m, 3H), 7.46 – 7.42 (m, 4H), 5.69 (s, 1H), 5.50 (s, 1H), 4.26 (s, 2H);  $^{13}\text{C NMR}$  (151 MHz,  $\text{CDCl}_3$ )  $\delta$  197.8, 147.0, 137.6, 134.8, 134.0, 132.3, 132.0, 129.6, 128.7, 128.2, 127.9, 127.7, 127.4, 126.1, 125.6, 125.6, 124.3, 35.0; HRMS (ESI)  $m/z$  calculated for  $\text{C}_{22}\text{H}_{19}\text{O}$   $[\text{M}+\text{H}]^+$   $\text{C}_{20}\text{H}_{17}\text{O}$   $[\text{M}+\text{H}]^+$ : 273.1274, found 273.1273.

### 2-(naphthalen-2-ylmethyl)-1-phenylprop-2-en-1-one (5n)<sup>11</sup>

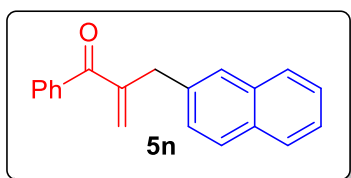

This compound was prepared by the general procedure described above and was obtained as white solid (18.1 mg, 66%). R<sub>f</sub> (PE:EtOAc =

20:1): 0.3; m.p. 78.0-78.7 °C; <sup>1</sup>H NMR (600 MHz, CDCl<sub>3</sub>) δ 7.81 (t, *J* = 7.9 Hz, 3H), 7.75 – 7.73 (m, 3H), 7.52 (t, *J* = 7.3 Hz, 1H), 7.48 – 7.44 (m, 2H), 7.43 – 7.40 (m, 3H), 5.81 (s, 1H), 5.73 (s, 1H), 3.98 (s, 2H); <sup>13</sup>C NMR (151 MHz, CDCl<sub>3</sub>) δ 197.6, 147.5, 137.6, 136.2, 133.6, 132.2, 132.2, 129.5, 128.2, 128.1, 127.7, 127.6, 127.6, 127.3, 126.0, 125.4, 38.4; HRMS (ESI) *m/z* calculated for C<sub>20</sub>H<sub>17</sub>O [M+H]<sup>+</sup>: 273.1274, found 273.1273.

**(E)-2-methylene-1,5-diphenylpent-4-en-1-one (5o)**<sup>12</sup>

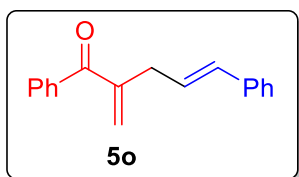

This compound was prepared by the general procedure described above and was obtained as colorless oil (11.6 mg, 47%). R<sub>f</sub> (PE:EtOAc =

50:1): 0.24; <sup>1</sup>H NMR (400 MHz, CDCl<sub>3</sub>) δ 7.79 – 7.77 (m, 2H), 7.57 – 7.53 (m, 1H), 7.47 – 7.43 (m, 2H), 7.39 – 7.37 (m, 2H), 7.33 – 7.29 (m, 2H), 7.24 – 7.20 (m, 1H), 6.52 (d, *J* = 15.8 Hz, 1H), 6.34 – 6.27 (m, 1H), 5.95 (s, 1H), 5.72 (s, 1H), 3.40 – 3.38 (m, 2H); <sup>13</sup>C NMR (101 MHz, CDCl<sub>3</sub>) δ 197.7, 146.5, 137.6, 137.3, 132.4, 132.2, 129.5, 128.5, 128.2, 127.2, 126.8, 126.5, 126.1, 35.4; HRMS (ESI) *m/z* calculated for C<sub>18</sub>H<sub>17</sub>O [M+H]<sup>+</sup>: 249.1274, found 249.1276.

**1-phenyl-2-(thiophen-3-ylmethyl)prop-2-en-1-one (5p)**

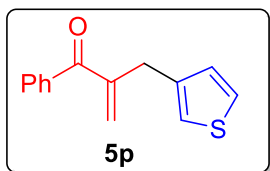

This compound was prepared by the general procedure described above and was obtained as yellow oil (10.6 mg, 46%). R<sub>f</sub> (PE:EtOAc = 50:1):

0.24; <sup>1</sup>H NMR (600 MHz, CDCl<sub>3</sub>) δ 7.73 – 7.72 (m, 2H), 7.53 (t, *J* = 7.4 Hz, 1H), 7.43 (t, *J* = 7.7 Hz, 1H), 7.22 – 7.26 (m, 1H), 7.06 – 7.04 (m, 1H), 6.99 – 6.98 (m, 1H), 5.80 (s, 1H), 5.69 (s, 1H), 3.83 (s, 1H); <sup>13</sup>C NMR (151 MHz, CDCl<sub>3</sub>) δ 197.6, 147.0, 138.8, 137.6, 132.2, 129.5, 128.5, 128.2, 126.8, 125.7, 121.9, 32.8; HRMS (ESI) *m/z* calculated for C<sub>14</sub>H<sub>13</sub>OS [M+H]<sup>+</sup>: 229.0682, found 229.0683.

### III. Reference:

1. Z. K. Wen, X. H. Liu, Y. F. Liu, J. B. Chao, Acid Promoted Direct Cross-Coupling of Methyl Ketones with Dimethyl Sulfoxide: Access to Ketoallyl Methylsulfides and -sulfones. *Org. Lett.*, **2017**, *19*, 5798-5801.
2. Y. Yatsumonji, Y. Ishida, A. Tsubouchi, T. Takeda, Nickel(0) Triethyl Phosphite Complex-Catalyzed Allylic Substitution with Retention of Regio- and Stereochemistry. *Org. Lett.*, **2007**, *9*, 4603-4606.
3. T. Bach, C. Körber, Fe(II)-Catalyzed Imidation of Allyl Sulfides and Subsequent [2,3]-Sigmatropic Rearrangement. Preparation of α -Branched N-tert-Butyloxycarbonyl (Boc)-Protected N-Allylamines. *J. Org. Chem.* **2000**, *65*, 2358-2367.
4. J. B. Li, K. G. Ji, R. H. Zheng, J. Nelson, L. M. Zhang, Expanding the horizon of intermolecular trapping of *in situ* generated α-oxo gold carbenes: efficient oxidative union of allylic sulfides and terminal alkynes *via* C–C bond formation. *Chem. Commun.*, **2014**, *50*, 4130-4133.
5. C.-H. Jun, H. Lee, J.-B. Hong, B.-I. Kwon, Efficient and Selective Hydroacylation of 1-Alkynes with Aldehydes by a Chelation-Assisted Catalytic System. *Angew. Chem. Int. Ed.* **2002**, *41*, 2146-2147.
6. V. Gembus, C. Furman, R. Millet, R. Mansouri, P. Chavatte, V. Levacher, J. F. Brière, Scaffold hopping strategy toward original pyrazolines as selective CB<sub>2</sub> receptor ligands. *Eur. J. Med. Chem.*, **2012**, *58*, 396-404.
7. W. P. Su, S. Urgaonkar, J. G. Verkade, Pd<sub>2</sub>(dba)<sub>3</sub>/P(*i*-BuNCH<sub>2</sub>CH<sub>2</sub>)<sub>3</sub>N-Catalyzed Stille Cross-Coupling of Aryl Chlorides. *Org. Lett.*, **2004**, *6*, 1421-1424.

8. L. L. Anka-Lufford, M. R. Prinsell, D. J. Weix, Selective Cross-Coupling of Organic Halides with Allylic Acetates. *J. Org. Chem.* **2012**, *77*, 9989-10000.
9. a) T. D. W. Claridge, S. G. Davies, J. A. Lee, R. L. Nicholson, P. M. Roberts, A. J. Russell, A. D. Smith, S. M. Toms, Highly (E)-Selective Wadsworth-Emmons Reactions Promoted by Methylmagnesium Bromide. *Org. Lett.*, **2008**, *10*, 5437-5440. b) N. S. Y. Loy, A. Singh, X. X. Xu, C. M. Park, Synthesis of Pyridines by Carbenoid-Mediated Ring Opening of 2H-Azirines. *Angew. Chem. Int. Ed.* **2013**, *52*, 2212-2216.
10. T. Nagata, A. Tamaki, K. Kiyokawa, R. Tsutsumi, M. Yamanaka, S. Minakata, Enantioselective Electrophilic Cyanation of Boron Enolates: Scope and Mechanistic Studies. *Chem. Eur. J.*, **2018**, *24*, 17027-17032.
11. H. Q. Geng, L. C. Wang, C. Y. Hou, X. F. Wu, Palladium-Catalyzed Carbonylative Synthesis of  $\alpha$ -Branched Enones from Aryl Iodides and Arylallenes. *Org. Lett.* **2020**, *22*, 1160-1163.
12. X. T. Ma, Y. Wang, R. H. Dai, C. R. Liu, S. K. Tian, Catalytic Allylation of Stabilized Phosphonium Ylides with Primary Allylic Amines. *J. Org. Chem.* **2013**, *78*, 11071-11075.

## IV. Copy of $^1\text{H}$ NMR, $^{13}\text{C}$ NMR Spectra

$^1\text{H}$  NMR spectrum of **3a** (600 MHz,  $\text{CDCl}_3$ )

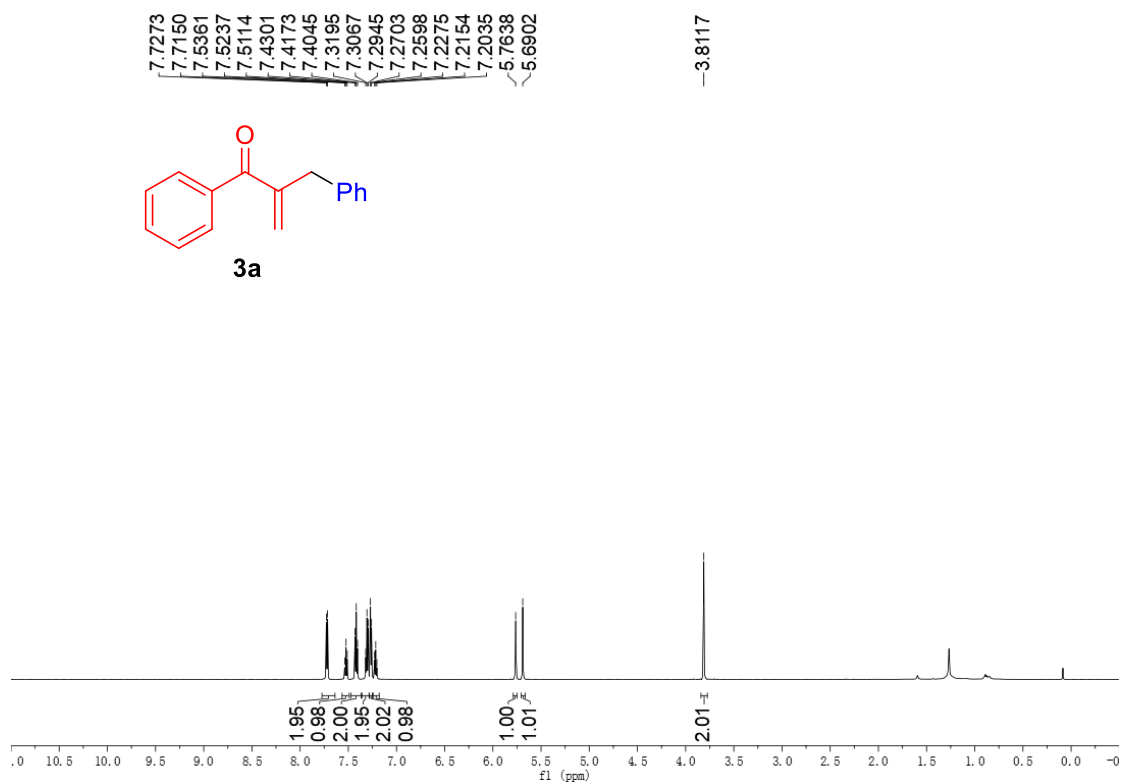

$^{13}\text{C}$  NMR spectrum of **3a** (151 MHz,  $\text{CDCl}_3$ )

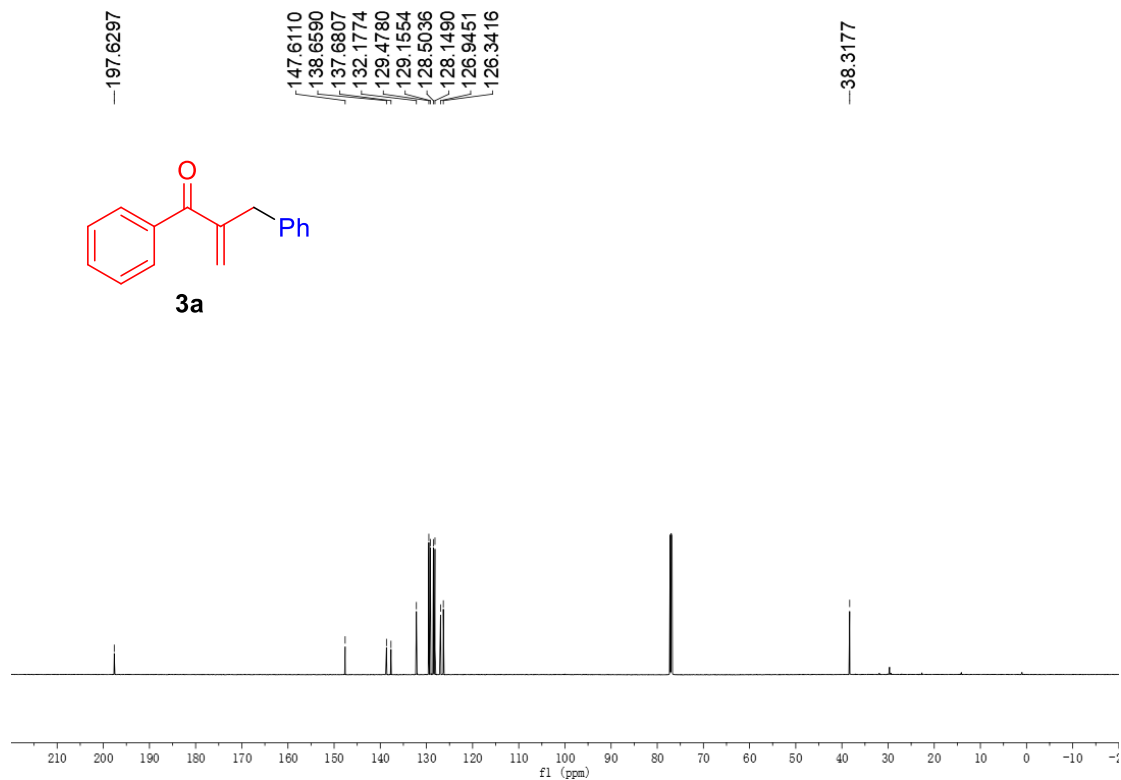

<sup>1</sup>H NMR spectrum of **3b** (600 MHz, CDCl<sub>3</sub>)

7.3496  
7.3452  
7.3370  
7.3298  
7.3246  
7.3178  
7.2900  
7.2786  
7.2595  
7.2474  
7.2351  
7.2288  
7.2157  
7.2084  
7.1962  
7.1839  
5.8176  
5.6850

-3.8082

-2.2817

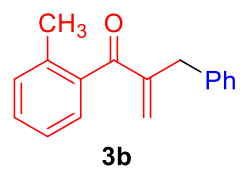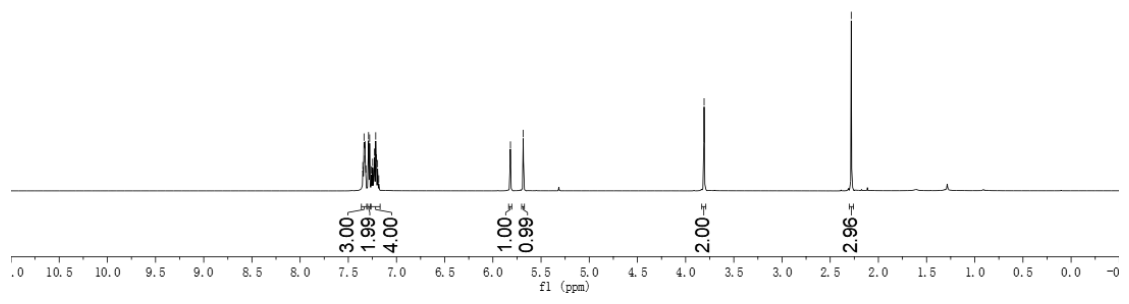

<sup>13</sup>C NMR spectrum of **3b** (151 MHz, CDCl<sub>3</sub>)

199.7953  
149.0628  
138.8572  
138.7291  
136.2634  
130.7362  
129.9948  
129.8335  
129.2135  
128.4813  
127.9786  
126.3032  
124.9714  
36.9492  
19.6051

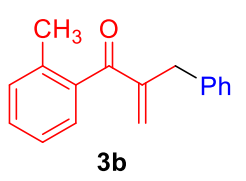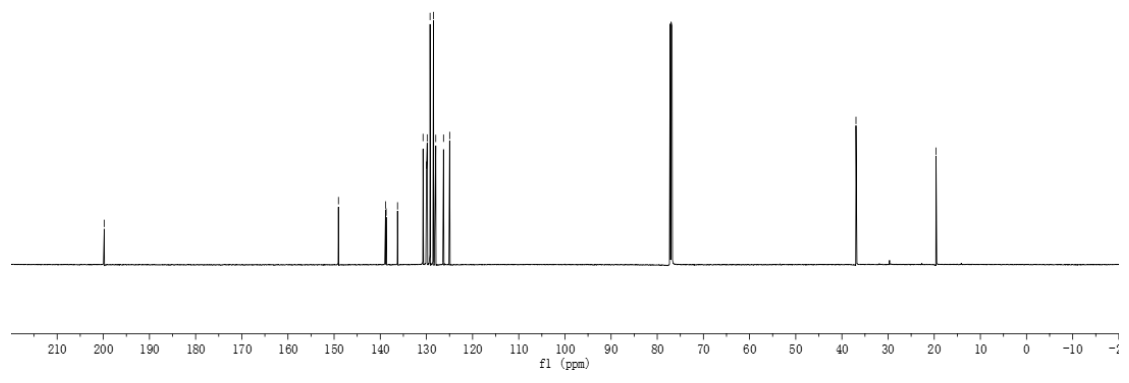

<sup>1</sup>H NMR spectrum of **3c** (600 MHz, CDCl<sub>3</sub>)

7.4722  
7.4602  
7.4499  
7.4376  
7.4136  
7.4018  
7.3900  
7.3378  
7.3252  
7.3130  
7.2717  
7.2598  
7.2489  
7.2368  
7.2246  
7.2065  
7.1940  
7.1815  
7.1223  
7.1071  
7.0920  
5.8246  
5.7959

-3.7974

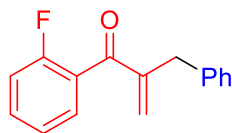

**3c**

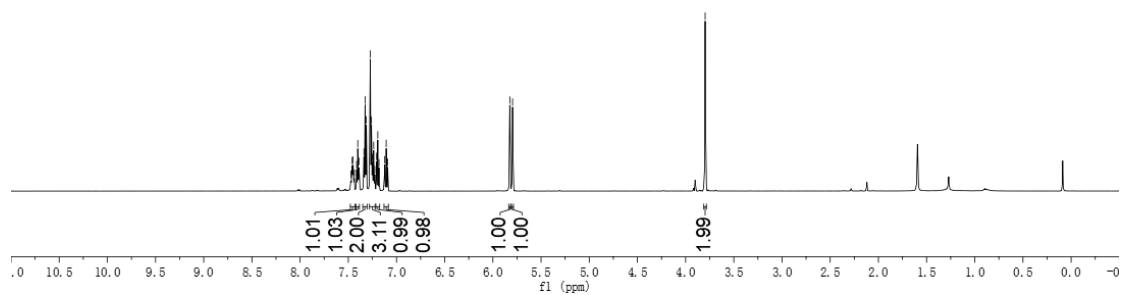

<sup>13</sup>C NMR spectrum of **3c** (151 MHz, CDCl<sub>3</sub>)

-194.6019  
160.5921  
158.9243  
148.6329  
138.6076  
132.5431  
132.4884  
130.1967  
130.1771  
129.8241  
129.8131  
129.2357  
128.4778  
127.2281  
127.1280  
126.3373  
124.0150  
123.9914  
116.1789  
116.0351

-36.8651

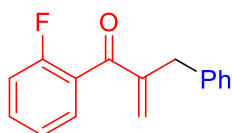

**3c**

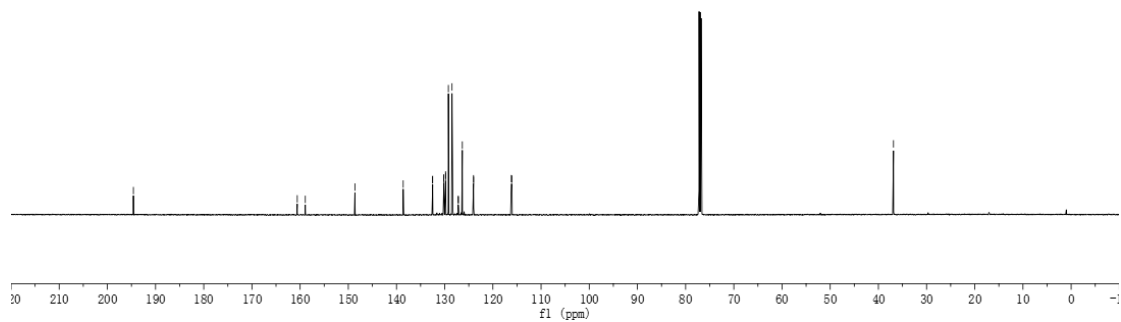



<sup>1</sup>H NMR spectrum of **3d** (600 MHz, CDCl<sub>3</sub>)

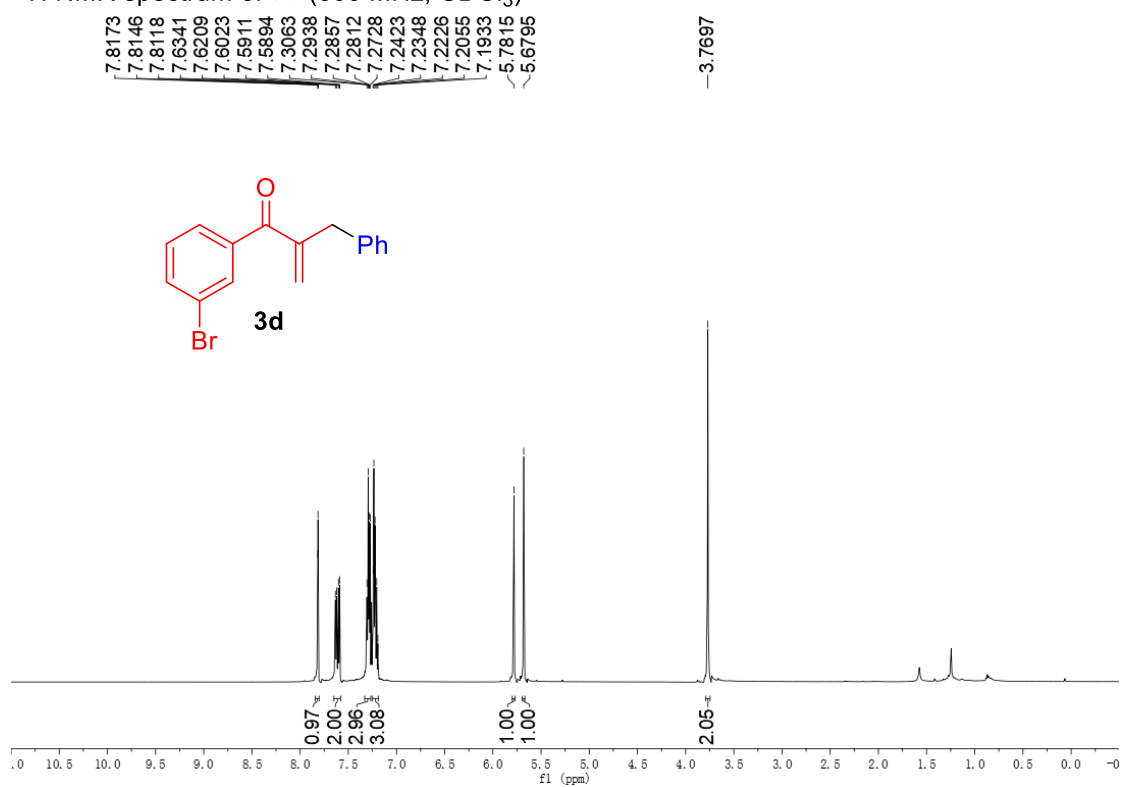

<sup>13</sup>C NMR spectrum of **3d** (151 MHz, CDCl<sub>3</sub>)

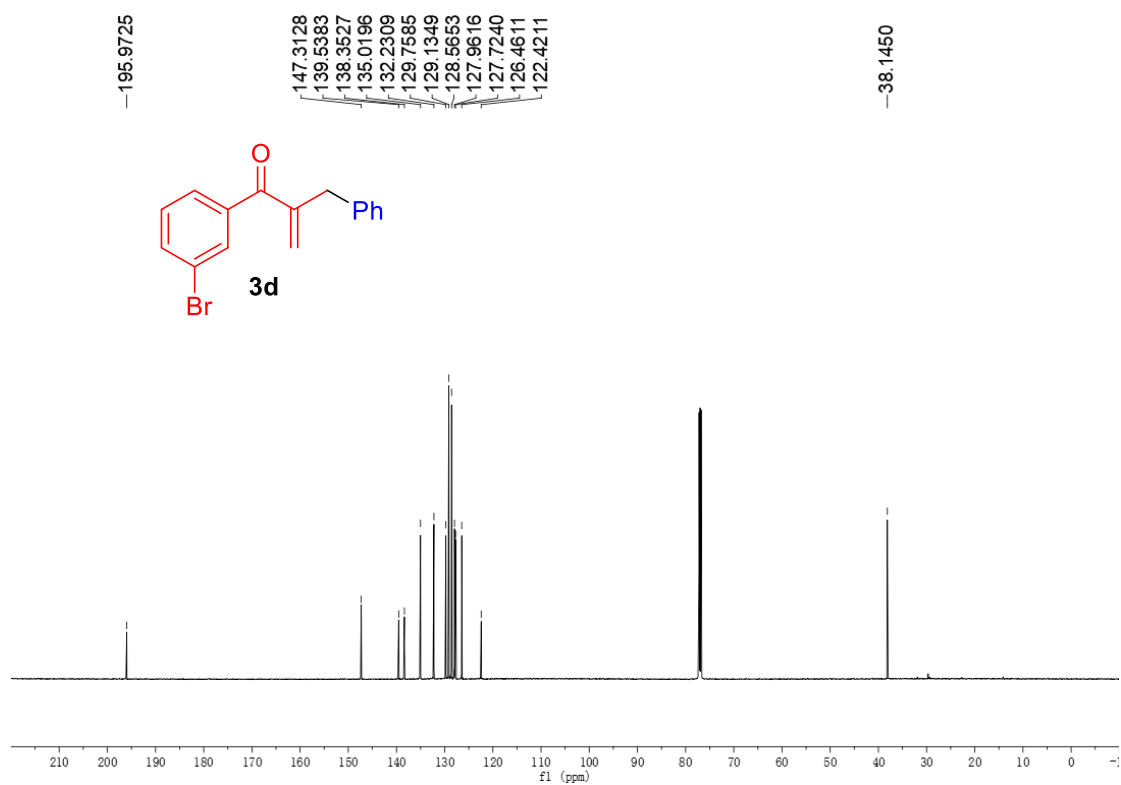

<sup>1</sup>H NMR spectrum of **3e** (600 MHz, CDCl<sub>3</sub>)

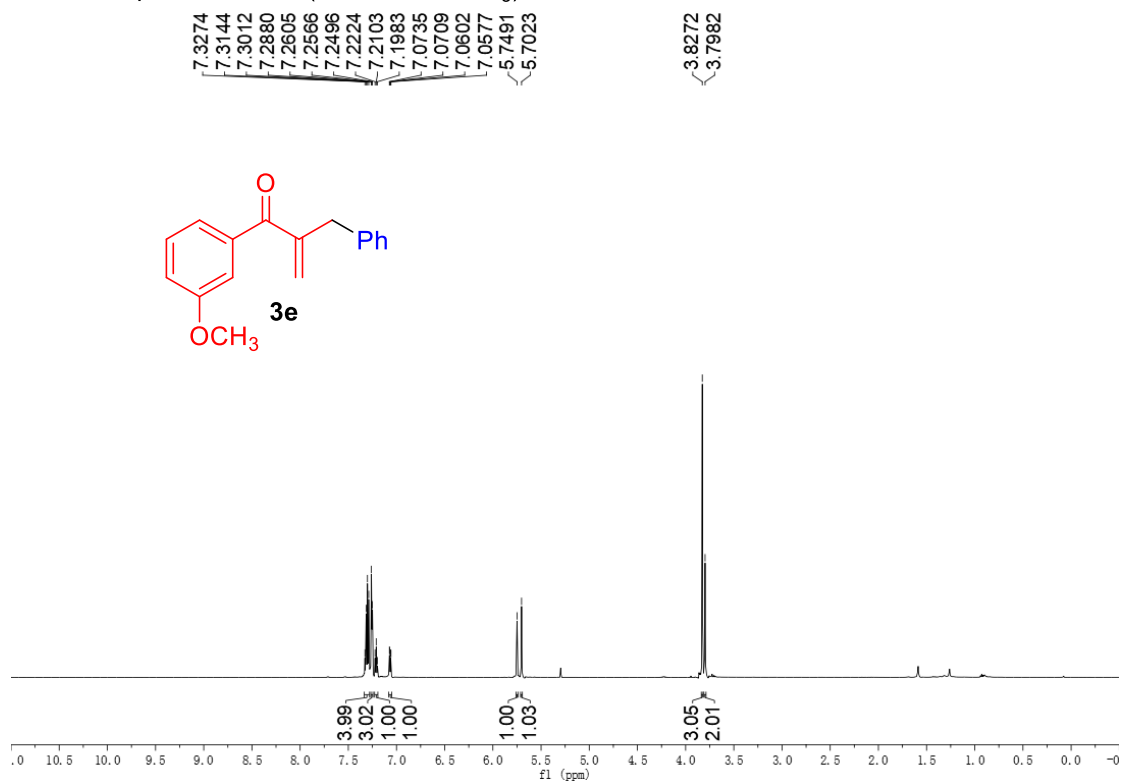

<sup>13</sup>C NMR spectrum of **3e** (151 MHz, CDCl<sub>3</sub>)

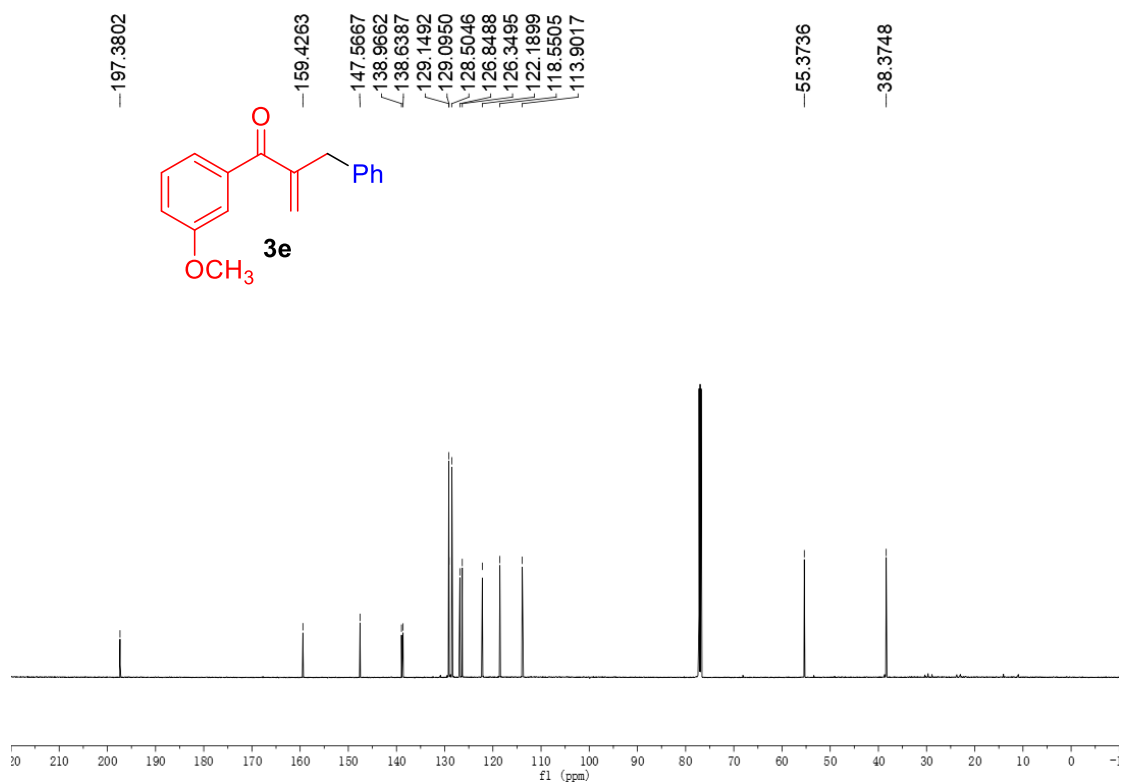

<sup>1</sup>H NMR spectrum of **3f** (600 MHz, CDCl<sub>3</sub>)

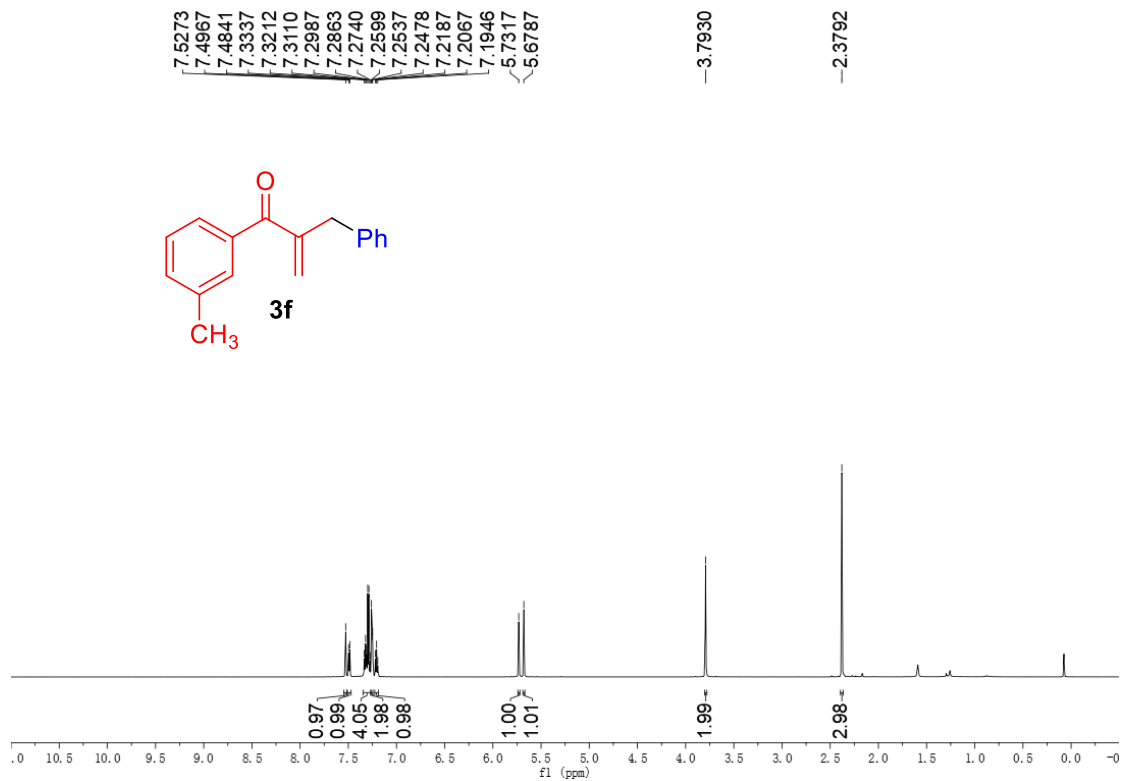

<sup>13</sup>C NMR spectrum of **3f** (151 MHz, CDCl<sub>3</sub>)

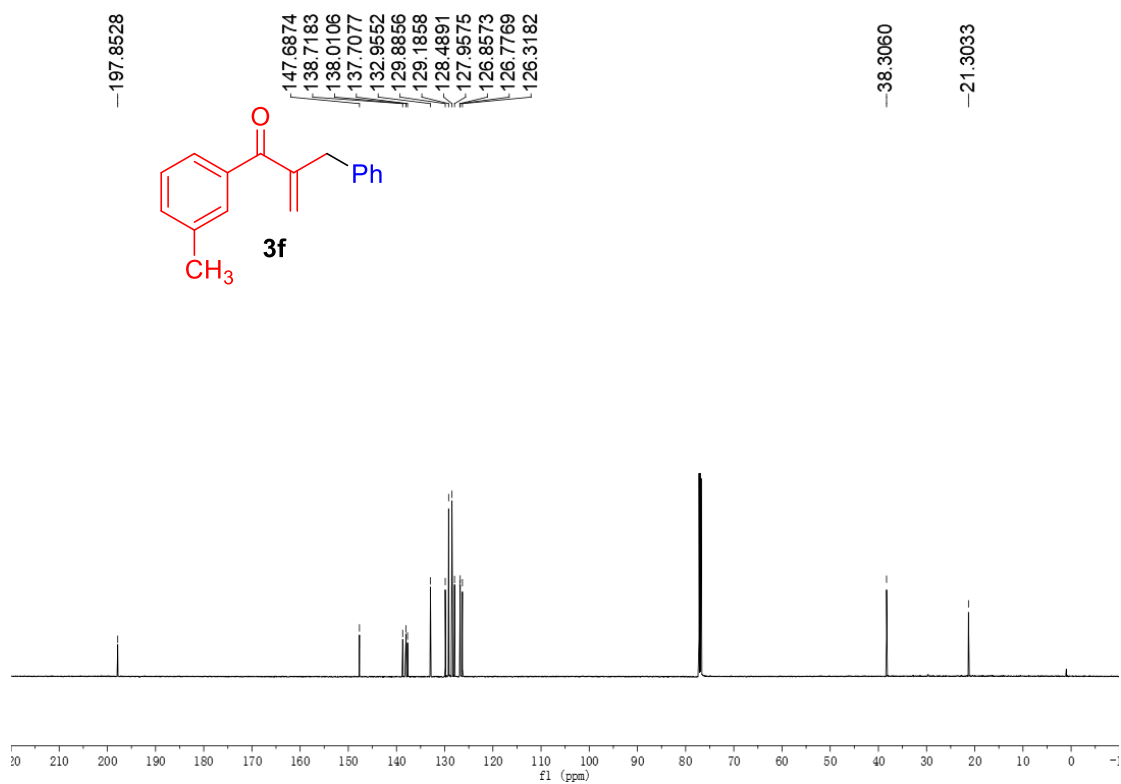

<sup>1</sup>H NMR spectrum of **3g** (600 MHz, CDCl<sub>3</sub>)

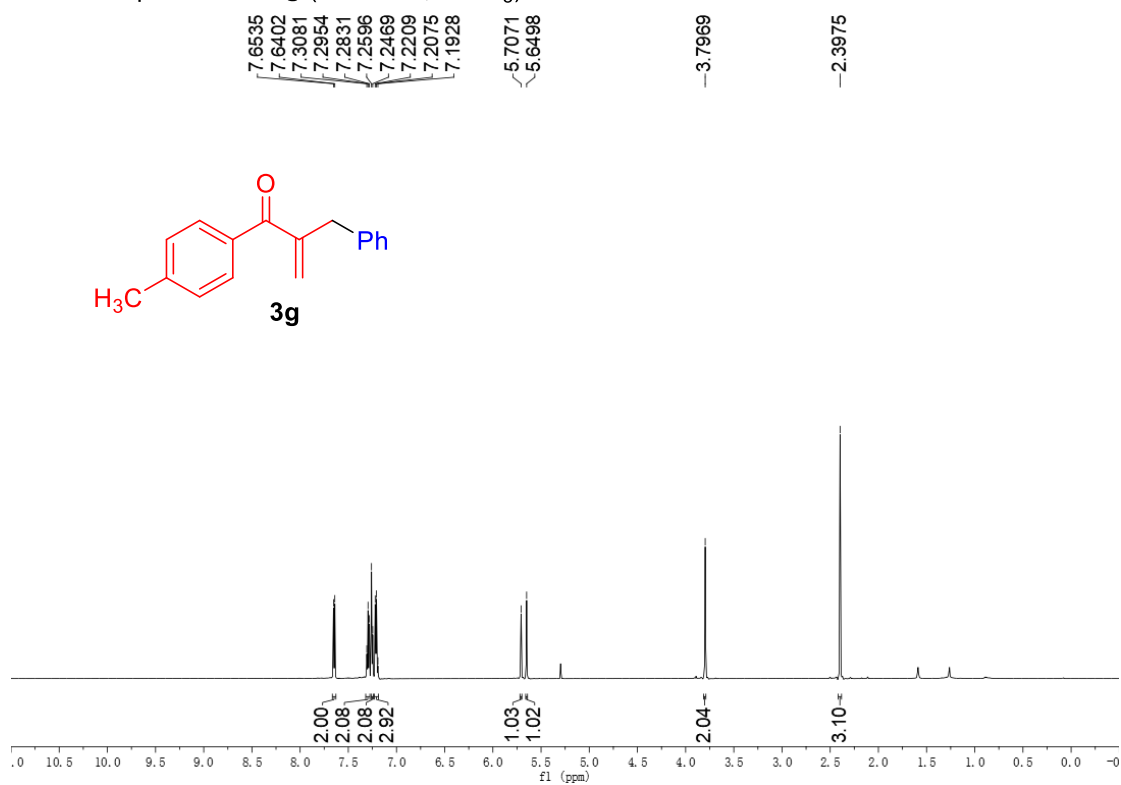

<sup>13</sup>C NMR spectrum of **3g** (151 MHz, CDCl<sub>3</sub>)

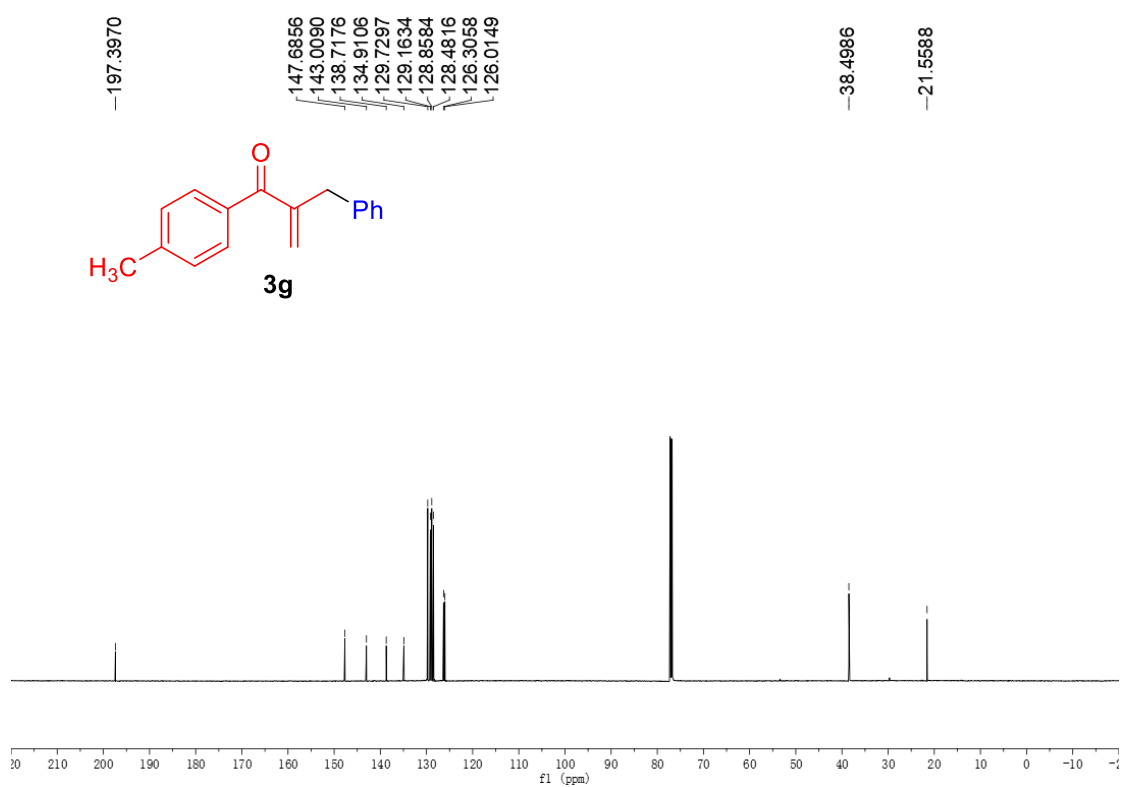

<sup>1</sup>H NMR spectrum of **3h** (600 MHz, CDCl<sub>3</sub>)

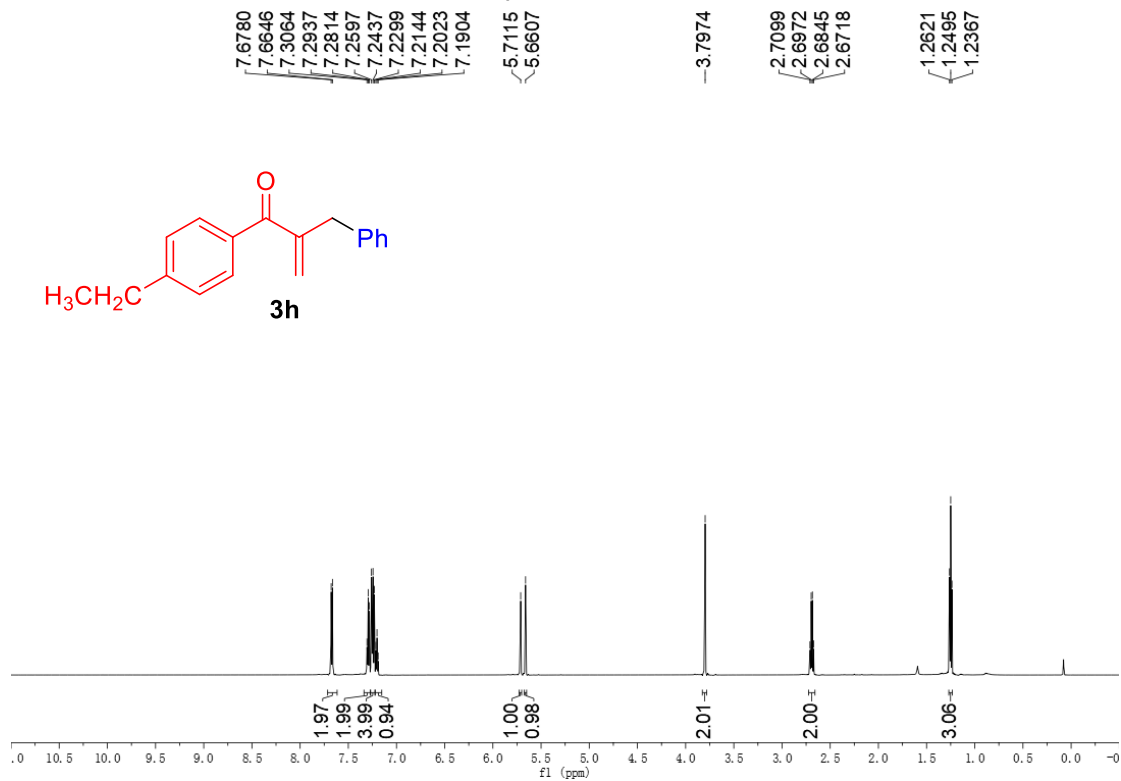

<sup>13</sup>C NMR spectrum of **3h** (151 MHz, CDCl<sub>3</sub>)

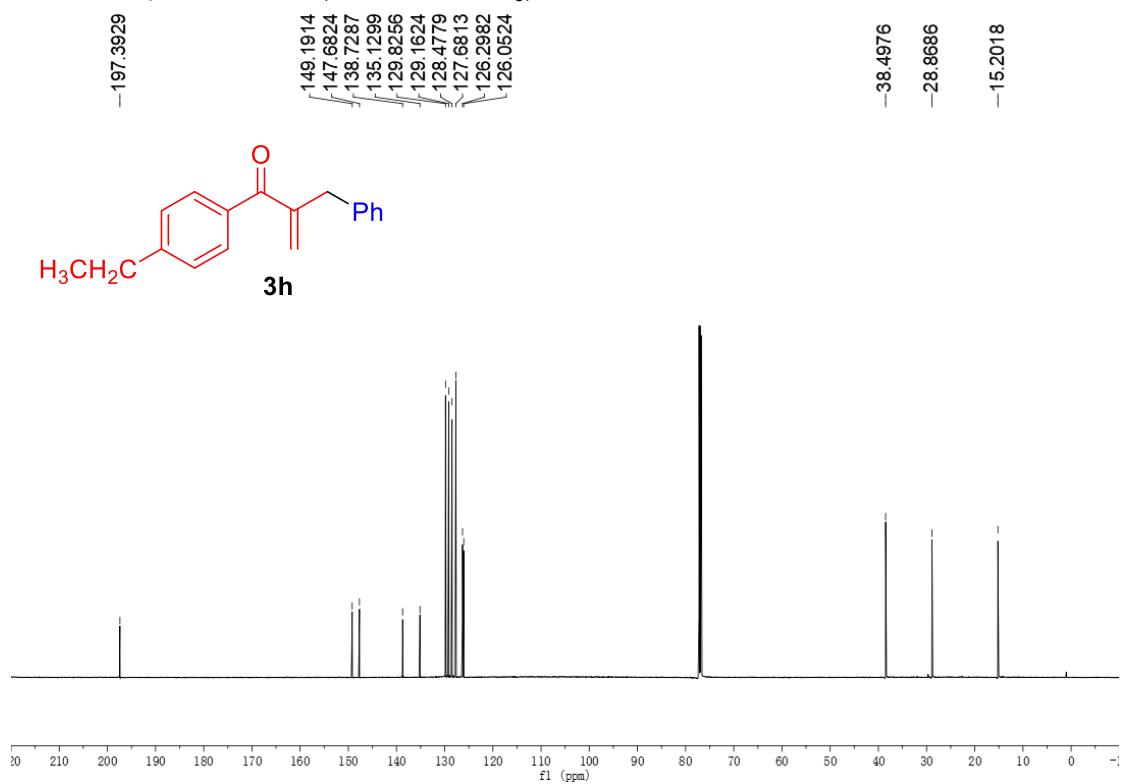

<sup>1</sup>H NMR spectrum of **3i** (600 MHz, CDCl<sub>3</sub>)

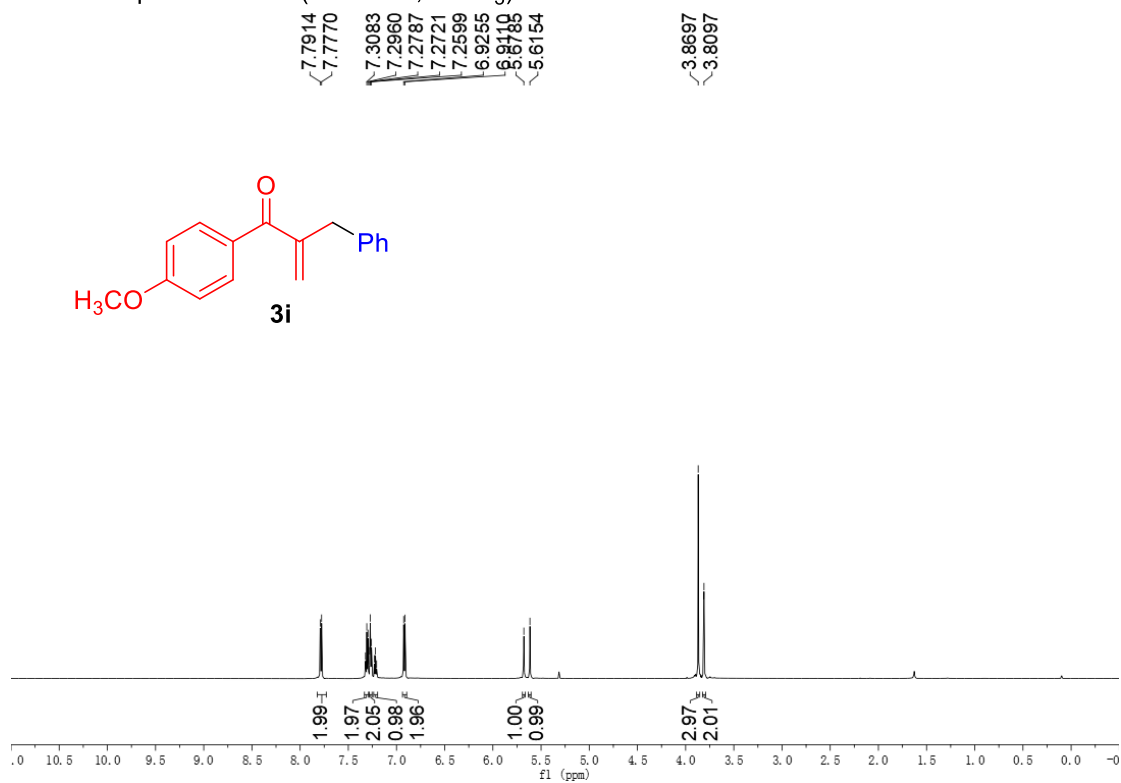

<sup>13</sup>C NMR spectrum of **3i** (151 MHz, CDCl<sub>3</sub>)

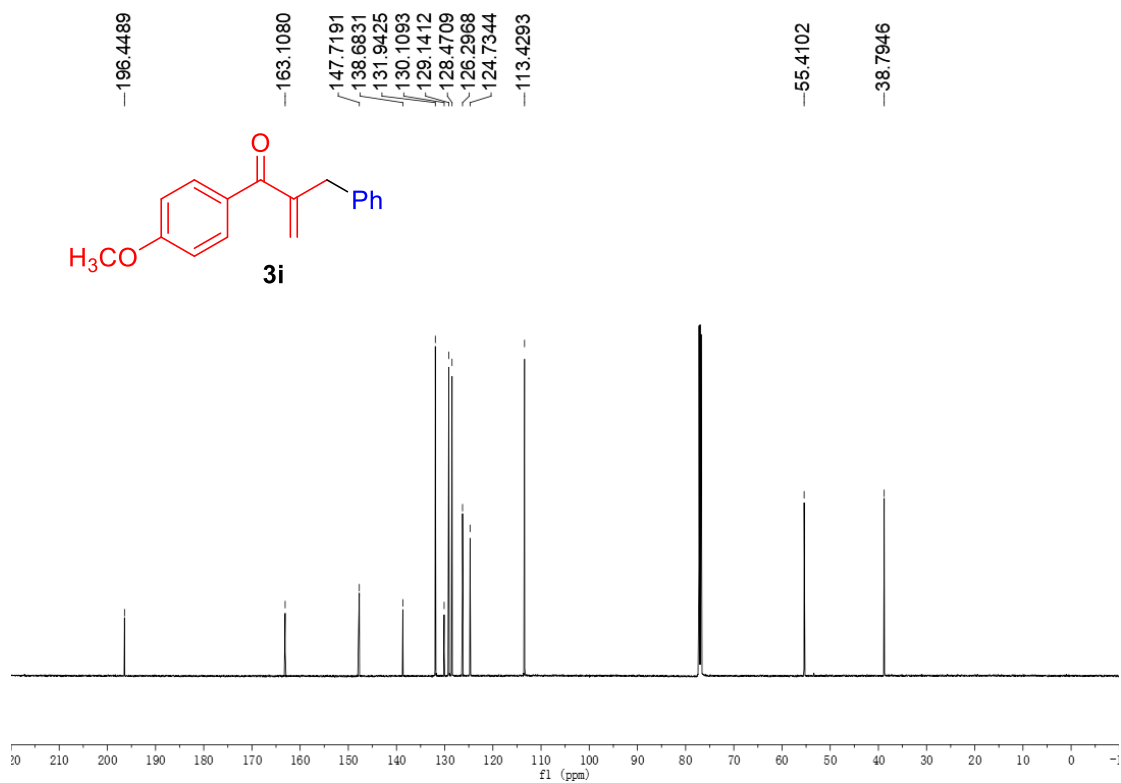

$^1\text{H}$  NMR spectrum of **3j** (600 MHz,  $\text{CDCl}_3$ )

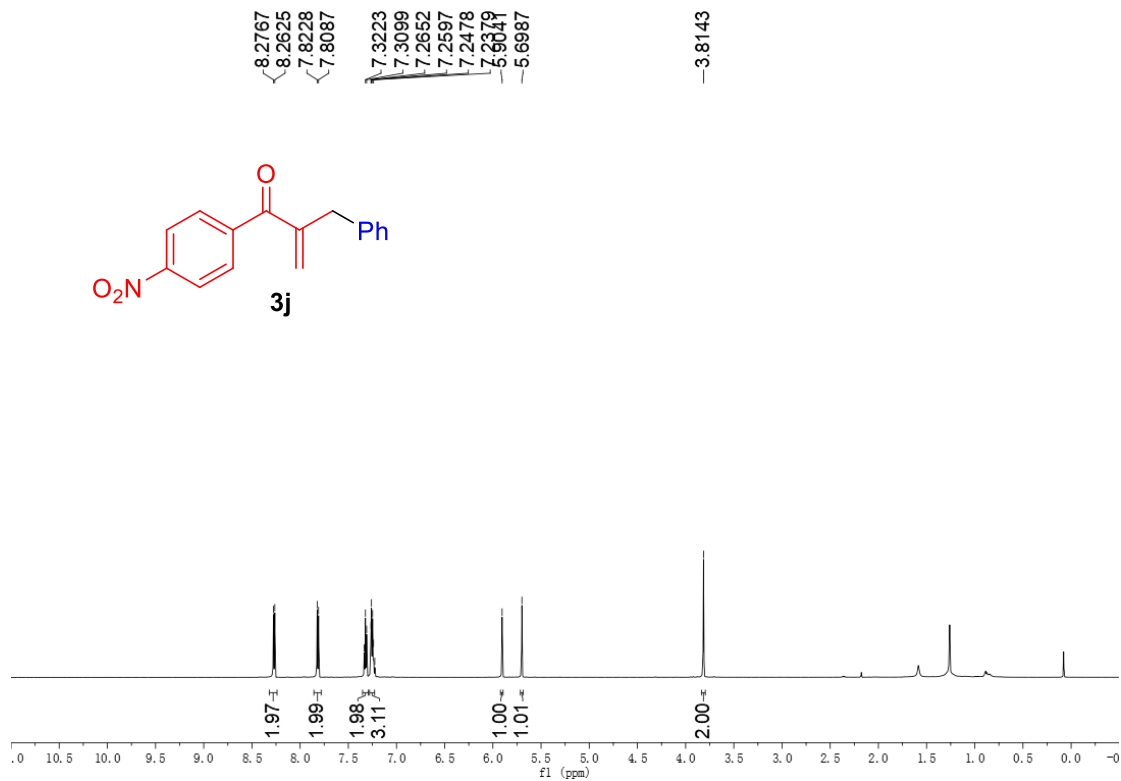

$^{13}\text{C}$  NMR spectrum of **3j** (151 MHz,  $\text{CDCl}_3$ )

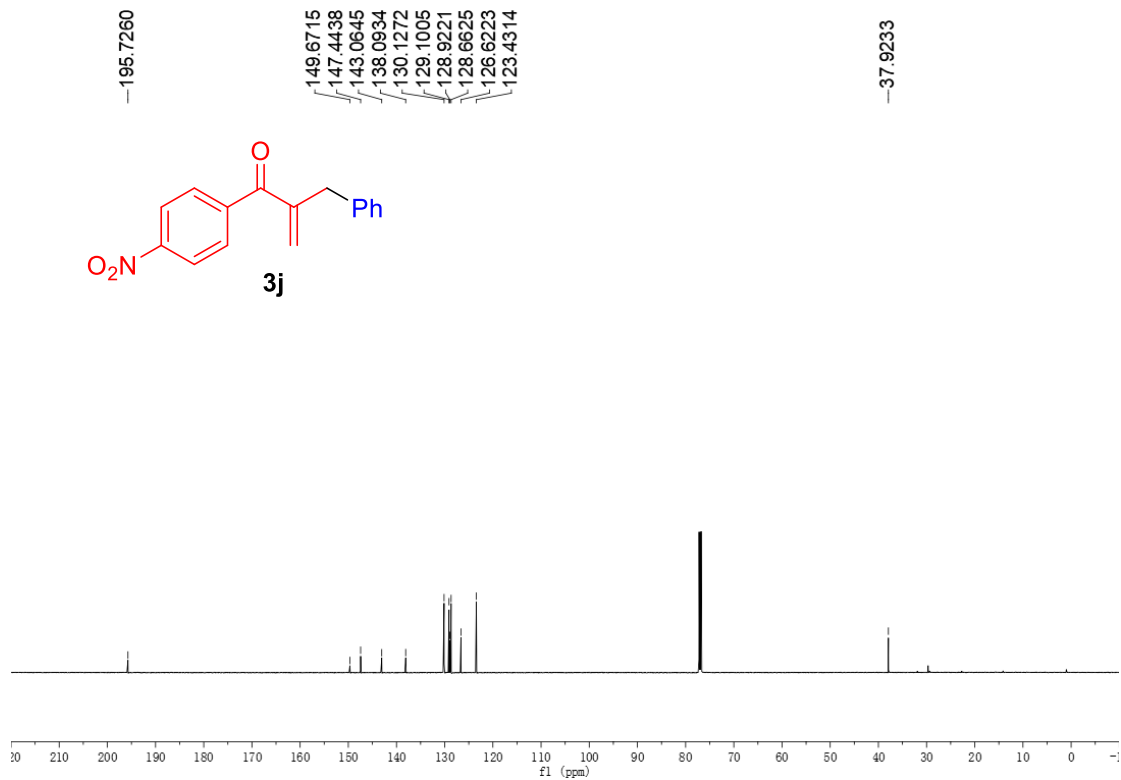

<sup>1</sup>H NMR spectrum of **3k** (600 MHz, CDCl<sub>3</sub>)

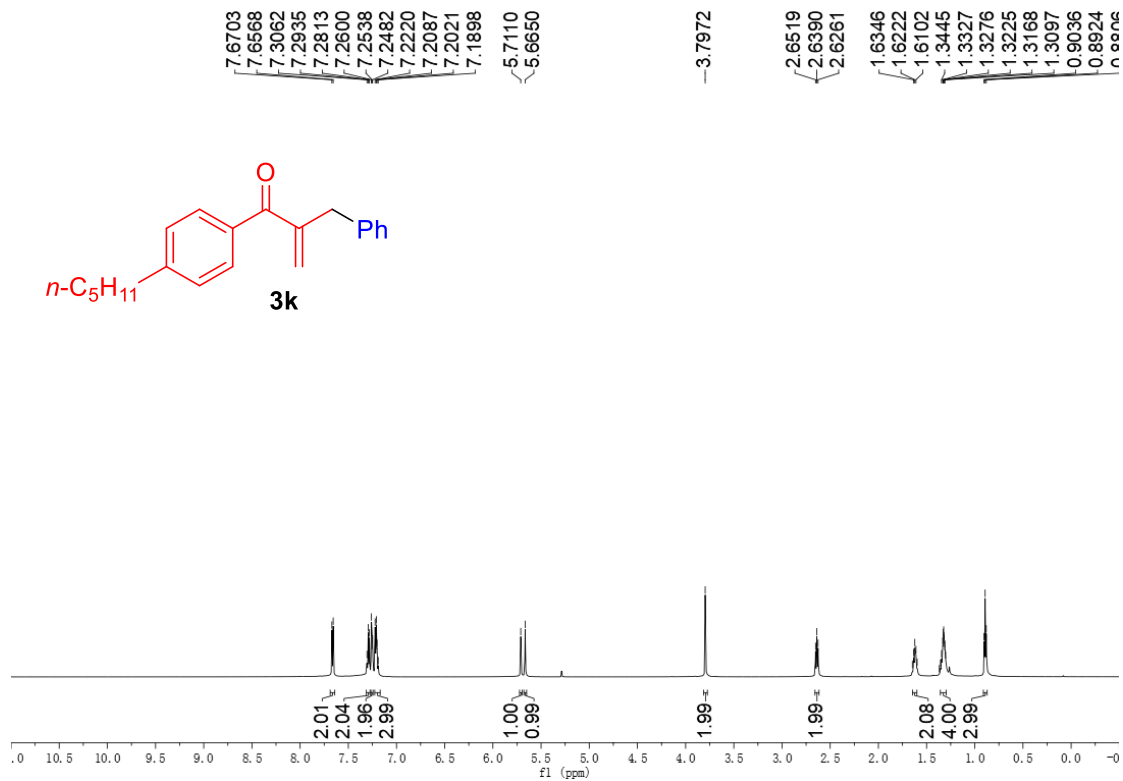

<sup>13</sup>C NMR spectrum of **3k** (151 MHz, CDCl<sub>3</sub>)

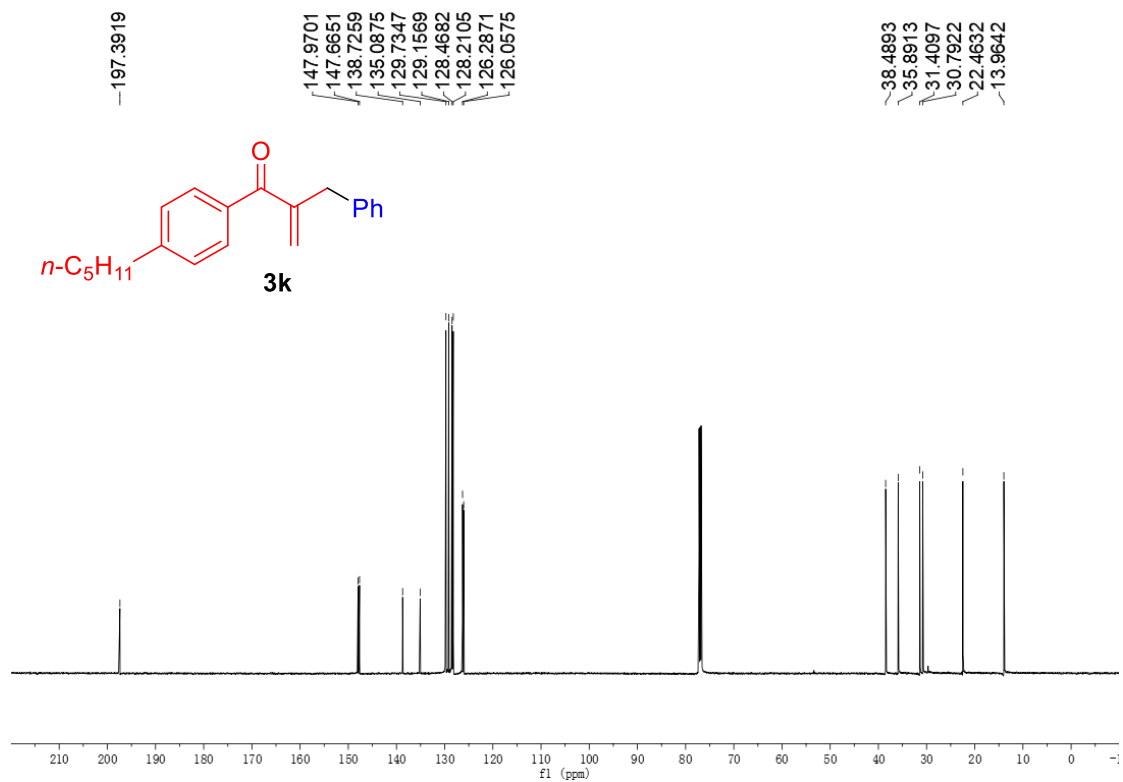



<sup>1</sup>H NMR spectrum of **3I** (600 MHz, CDCl<sub>3</sub>)

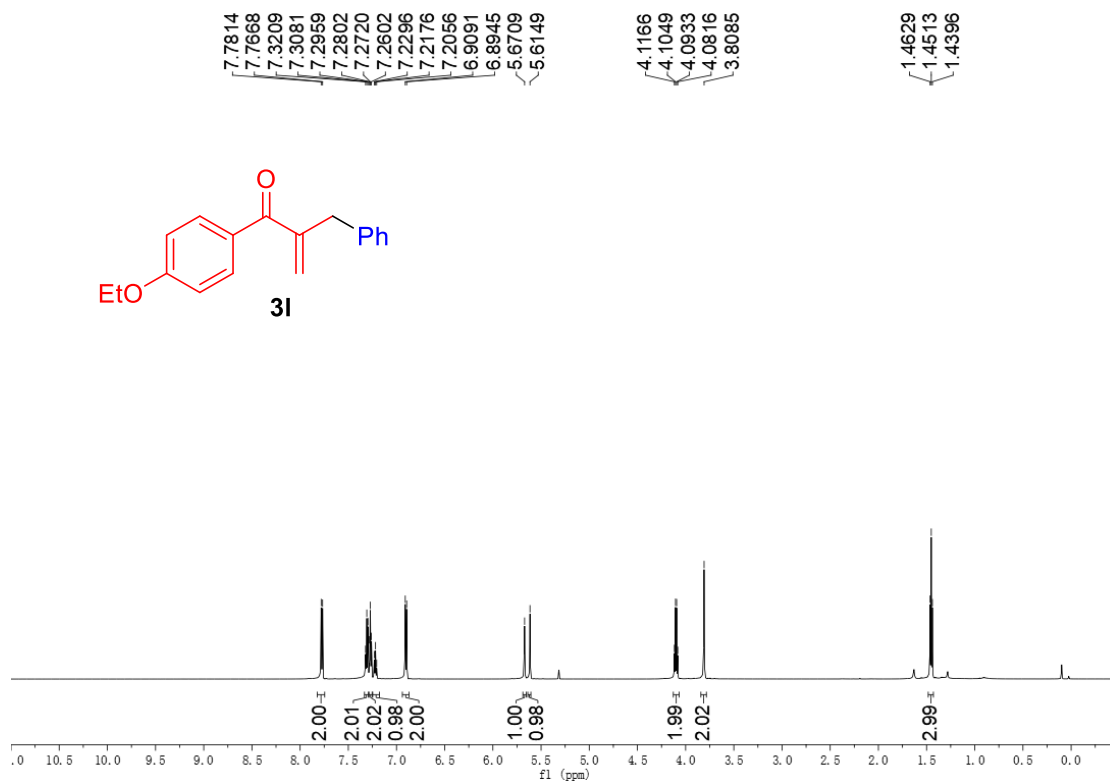

<sup>13</sup>C NMR spectrum of **3I** (151 MHz, CDCl<sub>3</sub>)

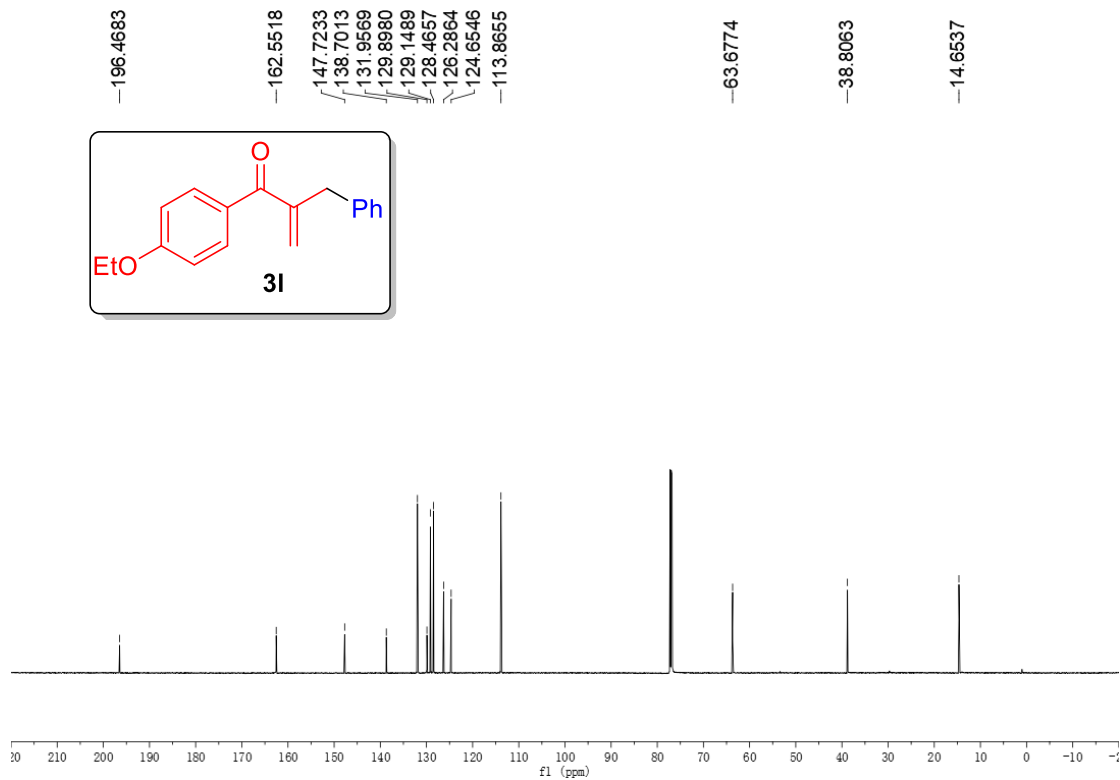

<sup>1</sup>H NMR spectrum of **3m** (600 MHz, CDCl<sub>3</sub>)

8.0827  
8.0693  
7.7370  
7.7235  
7.3222  
7.3096  
7.2974  
7.2605  
7.2473  
7.2333  
7.2213  
7.2092  
5.8267  
5.6944  
3.9417  
3.8041

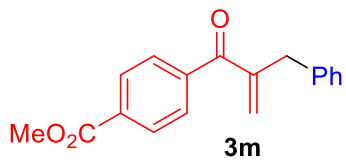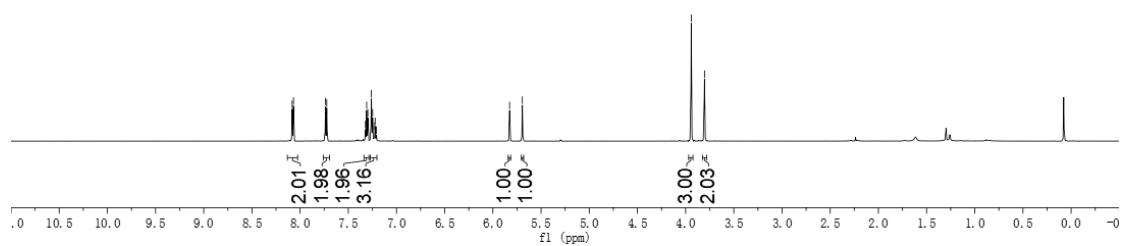

<sup>13</sup>C NMR spectrum of **3m** (151 MHz, CDCl<sub>3</sub>)

196.9442  
166.2766  
147.5312  
141.4923  
138.4141  
132.9871  
129.3805  
129.1970  
129.1383  
128.5704  
128.1968  
126.4624  
52.4007  
38.0298

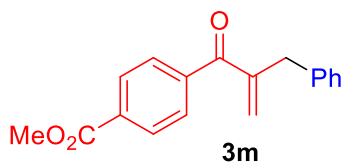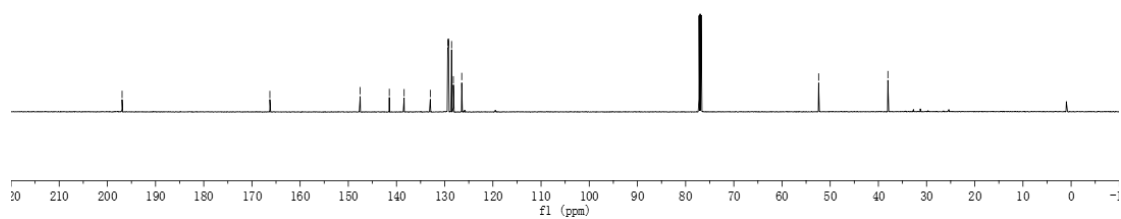

<sup>1</sup>H NMR spectrum of **3n** (600 MHz, CDCl<sub>3</sub>)

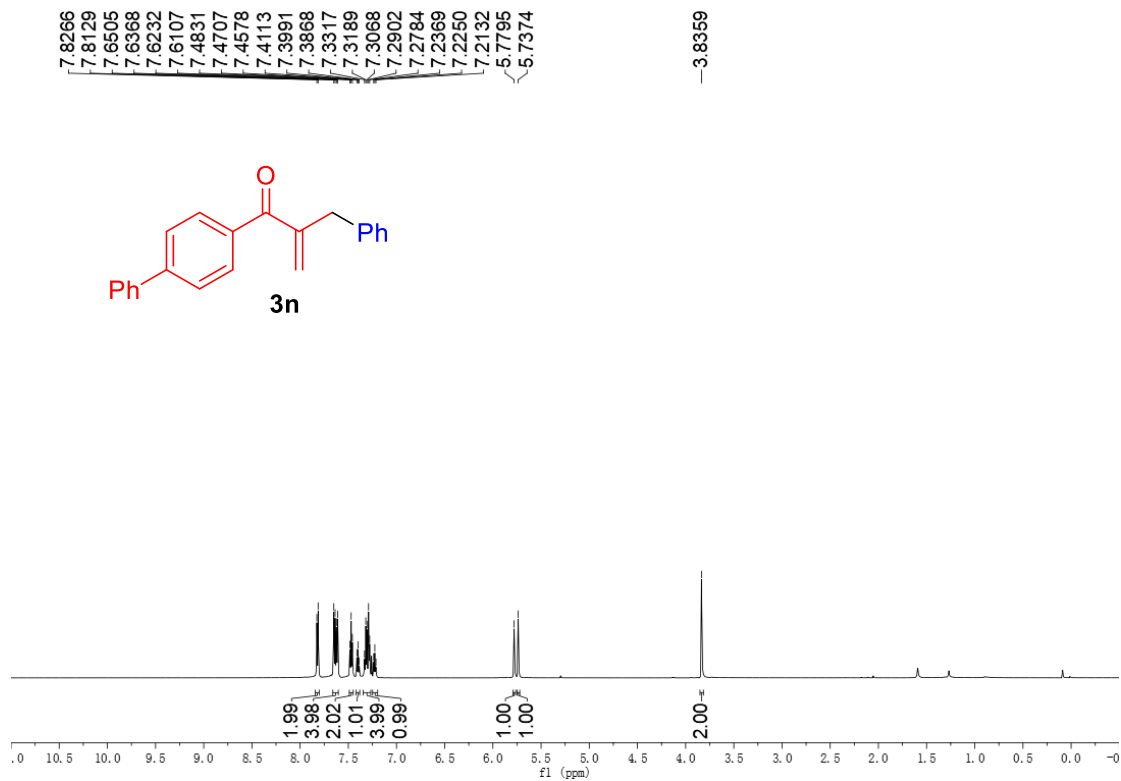

<sup>13</sup>C NMR spectrum of **3n** (151 MHz, CDCl<sub>3</sub>)

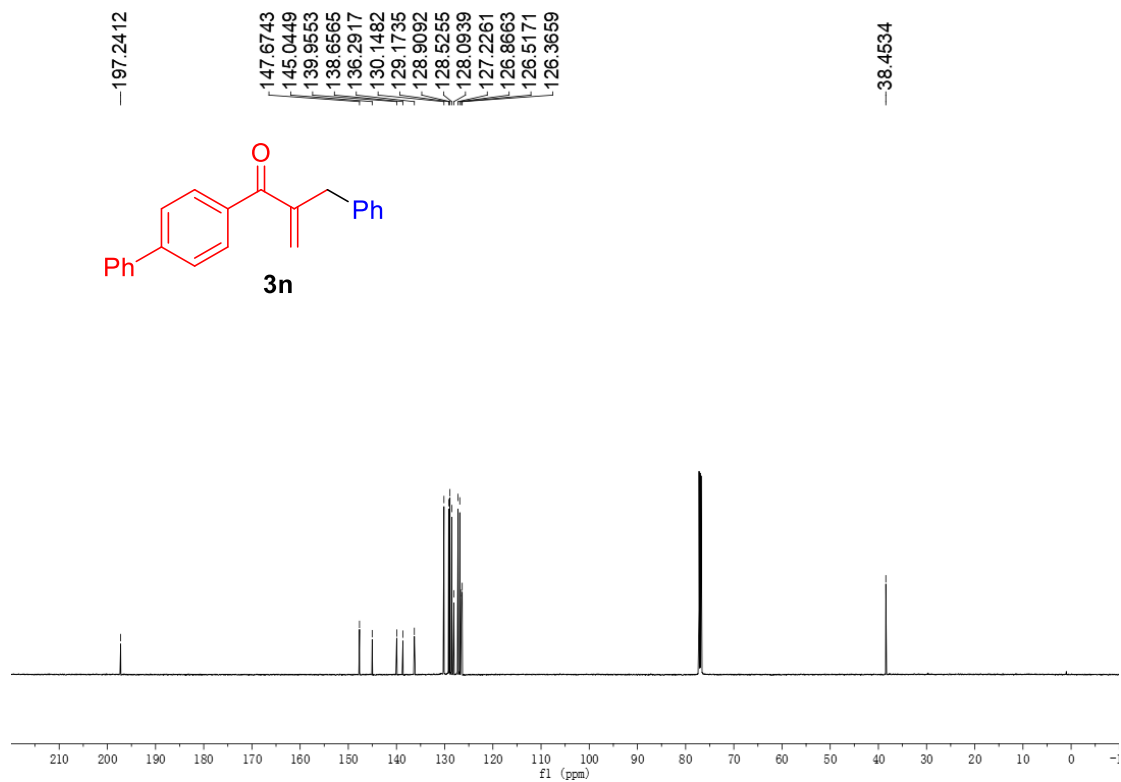

<sup>1</sup>H NMR spectrum of **3o** (600 MHz, CDCl<sub>3</sub>)

8.2165  
7.9199  
7.9065  
7.8886  
7.8795  
7.8744  
7.8664  
7.8554  
7.8529  
7.8412  
7.8387  
7.5885  
7.5888  
7.5753  
7.5733  
7.5544  
7.5526  
7.5410  
7.3282  
7.3172  
7.3064  
5.6288  
5.6014  
5.7585

—3.8740

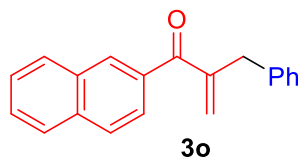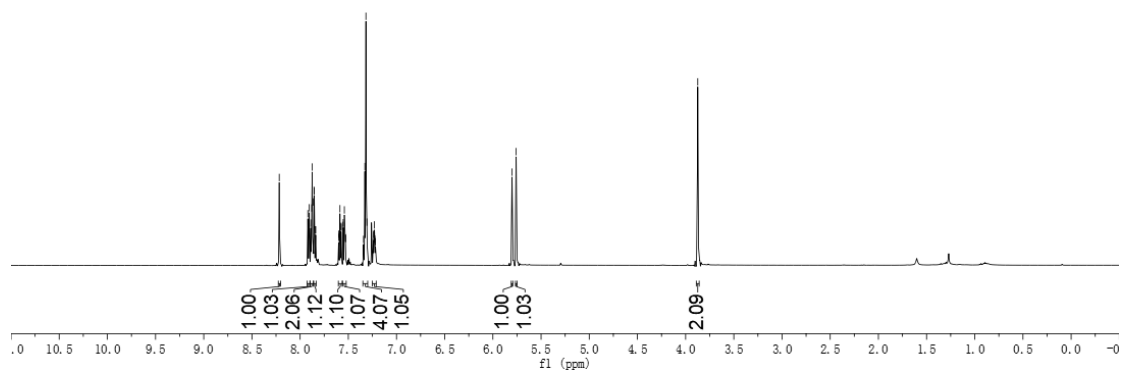

<sup>13</sup>C NMR spectrum of **3o** (151 MHz, CDCl<sub>3</sub>)

—197.6036

147.7826  
138.6747  
135.1583  
134.8506  
132.1814  
131.0496  
129.3297  
129.2116  
128.5377  
128.1565  
128.1363  
127.7297  
126.7153  
126.6806  
126.3836  
125.4126

—38.4969

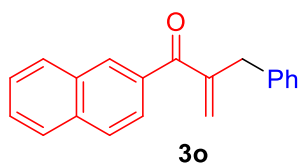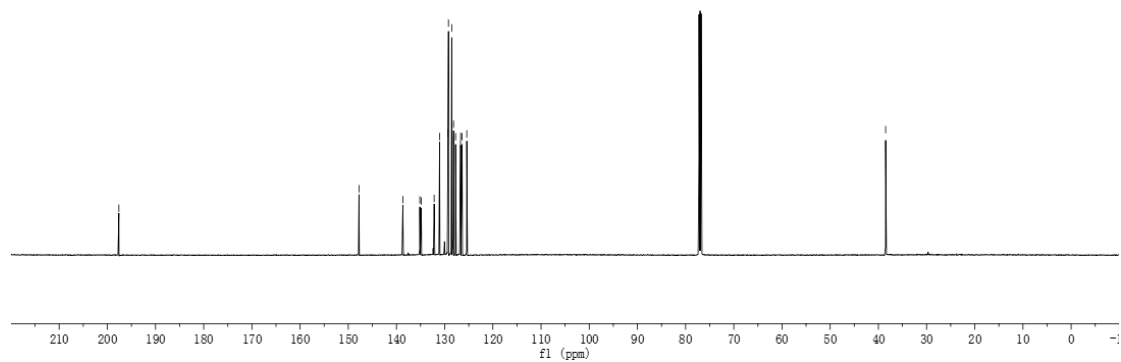

<sup>1</sup>H NMR spectrum of **3p** (600 MHz, CDCl<sub>3</sub>)

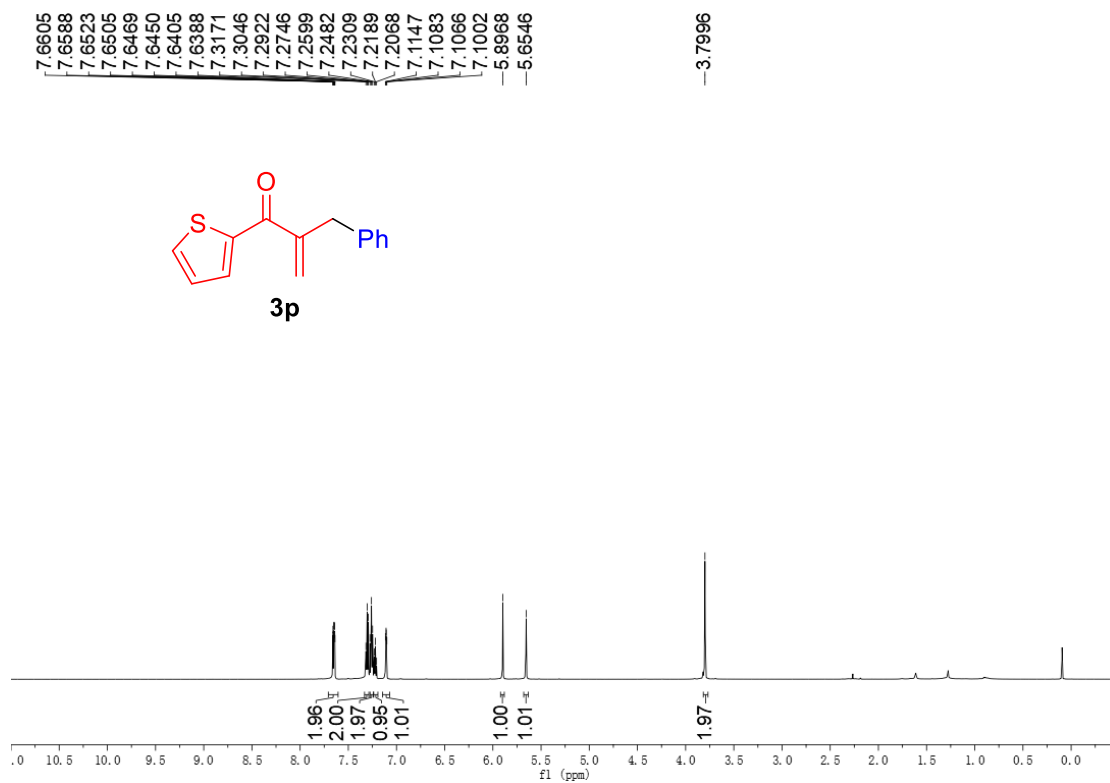

<sup>13</sup>C NMR spectrum of **3p** (151 MHz, CDCl<sub>3</sub>)

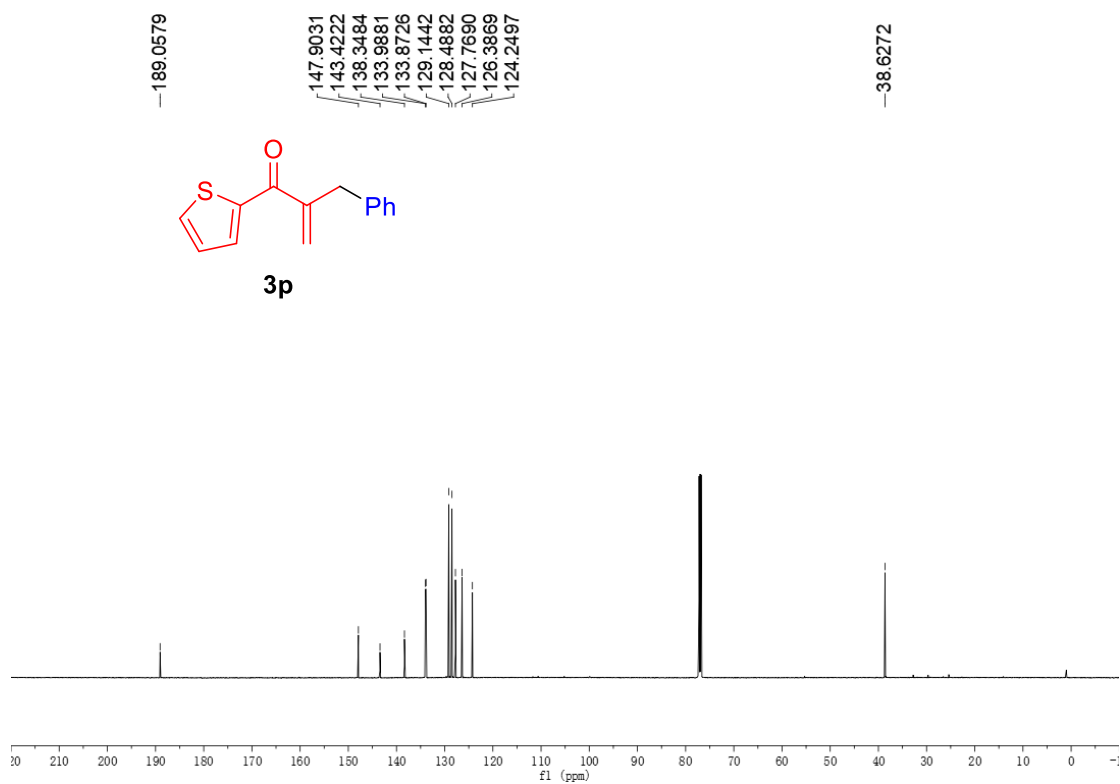

$^1\text{H}$  NMR spectrum of **3q** (600 MHz,  $\text{CDCl}_3$ )

7.4084  
7.4017  
7.2999  
7.2871  
7.2749  
7.2186  
7.2065  
7.1951  
6.9186  
6.9119  
5.8259  
5.6321

3.7502

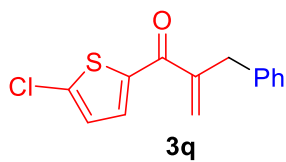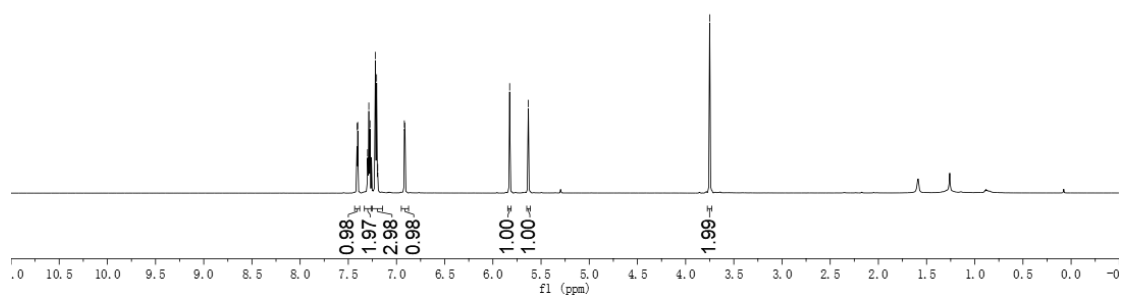

$^{13}\text{C}$  NMR spectrum of **3q** (151 MHz,  $\text{CDCl}_3$ )

188.0618

147.2108  
141.9651  
139.8828  
138.0834  
133.4308  
129.0830  
128.5409  
127.3180  
126.4902  
124.1219

38.6367

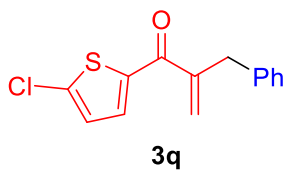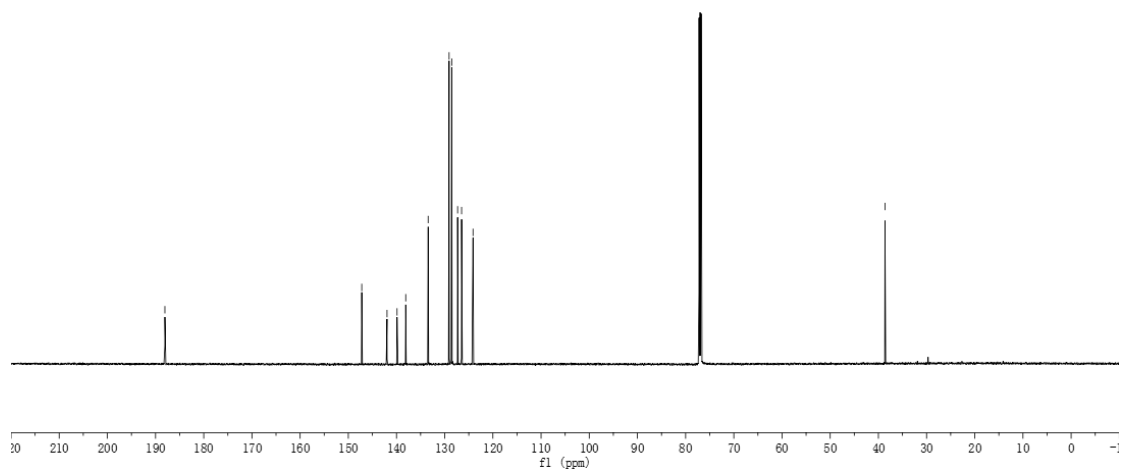

<sup>1</sup>H NMR spectrum of **3r** (600 MHz, CDCl<sub>3</sub>)

7.3612  
7.3545  
7.2978  
7.2850  
7.2728  
7.2165  
7.2046  
7.1934  
7.0620  
7.0554  
-5.8319  
-5.6314

-3.7493

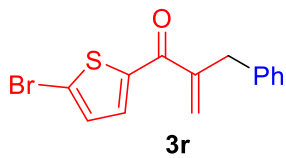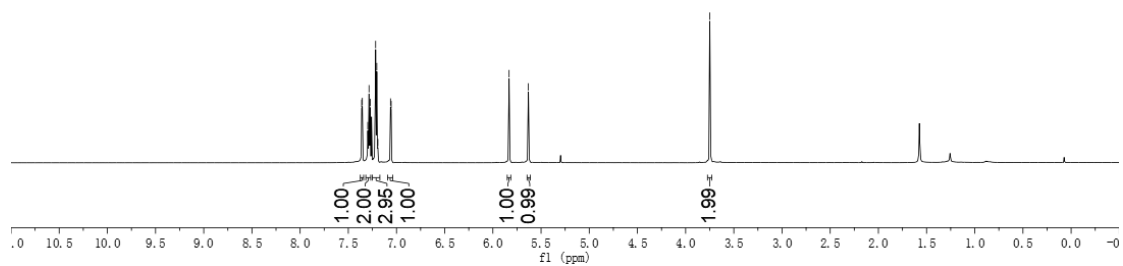

<sup>13</sup>C NMR spectrum of **3r** (151 MHz, CDCl<sub>3</sub>)

-187.8568

147.3319  
144.7944  
138.0926  
133.9961  
130.9724  
129.0871  
128.5466  
126.4943  
124.1936  
122.9786

-38.6233

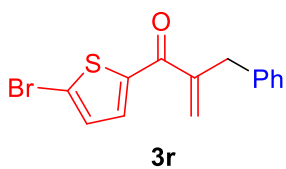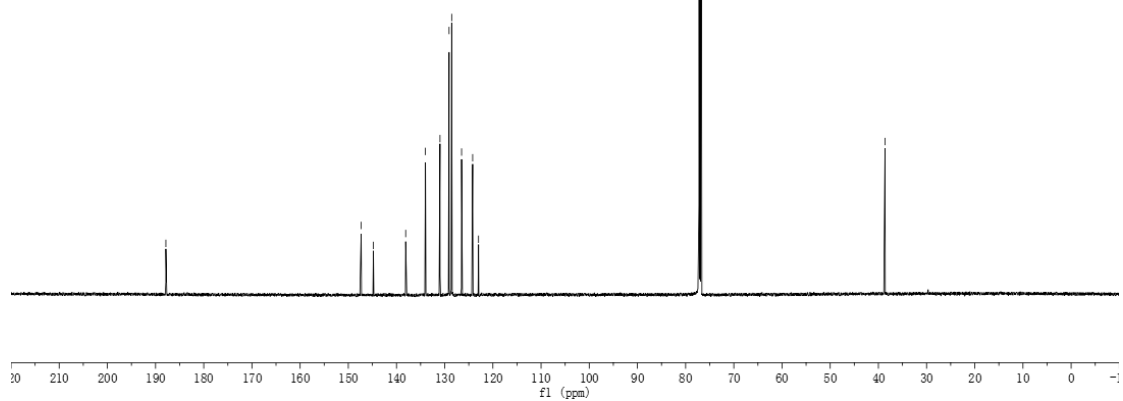

<sup>1</sup>H NMR spectrum of **3s** (600 MHz, CDCl<sub>3</sub>)

7.6217  
7.2959  
7.2833  
7.2709  
7.2602  
7.2283  
7.2151  
7.2004  
7.1883  
7.1199  
7.1141  
6.5066  
6.5035  
6.5023  
6.0485  
-5.6539

-3.7713

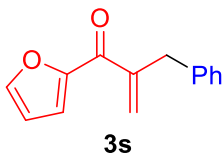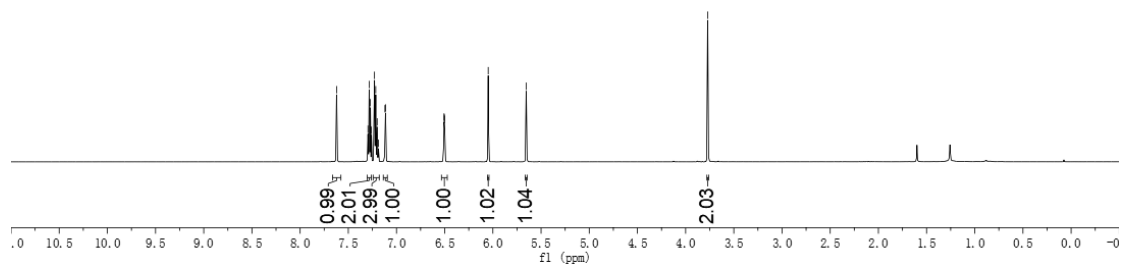

<sup>13</sup>C NMR spectrum of **3s** (151 MHz, CDCl<sub>3</sub>)

183.5013  
151.9639  
147.3133  
147.0058  
138.4056  
129.1618  
128.4661  
126.3551  
125.0216  
119.8730  
111.9002

-38.2068

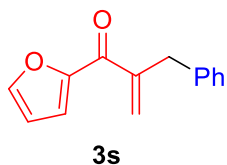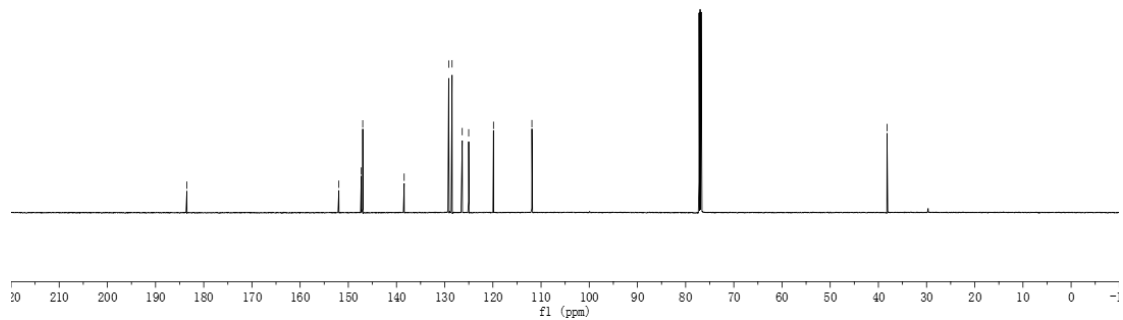



<sup>1</sup>H NMR spectrum of **3t** (600 MHz, CDCl<sub>3</sub>)

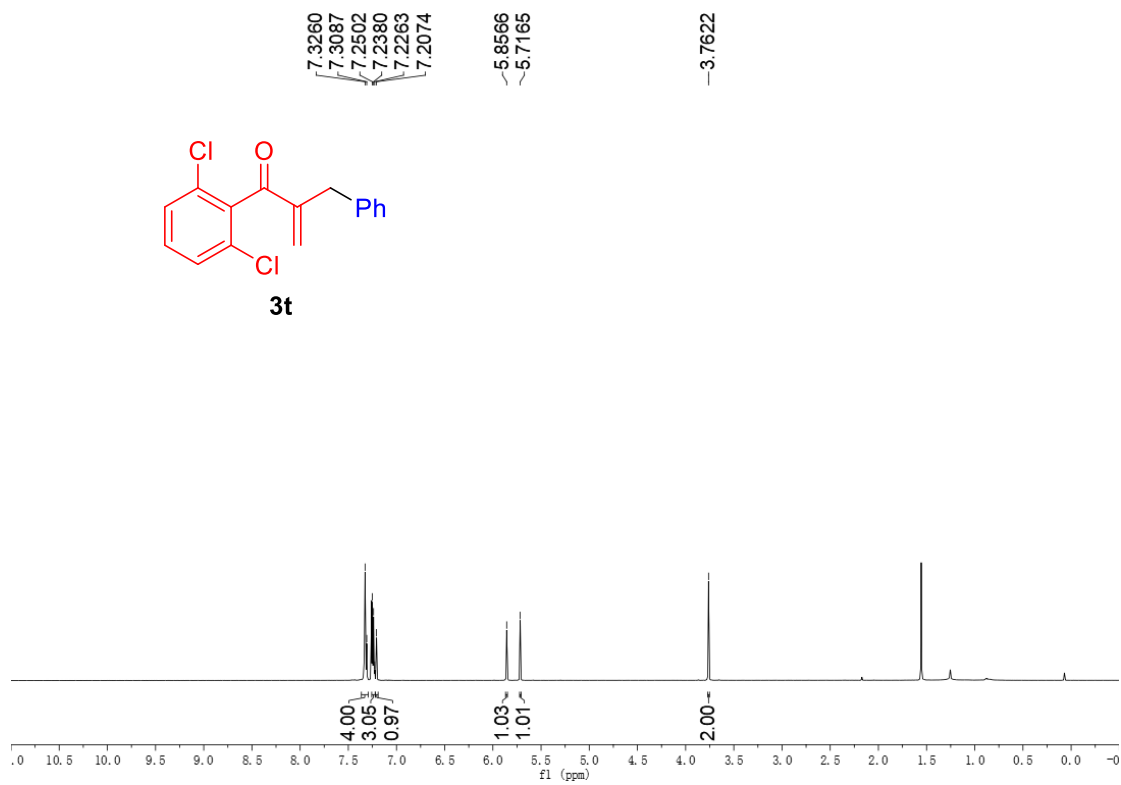

<sup>13</sup>C NMR spectrum of **3t** (151 MHz, CDCl<sub>3</sub>)

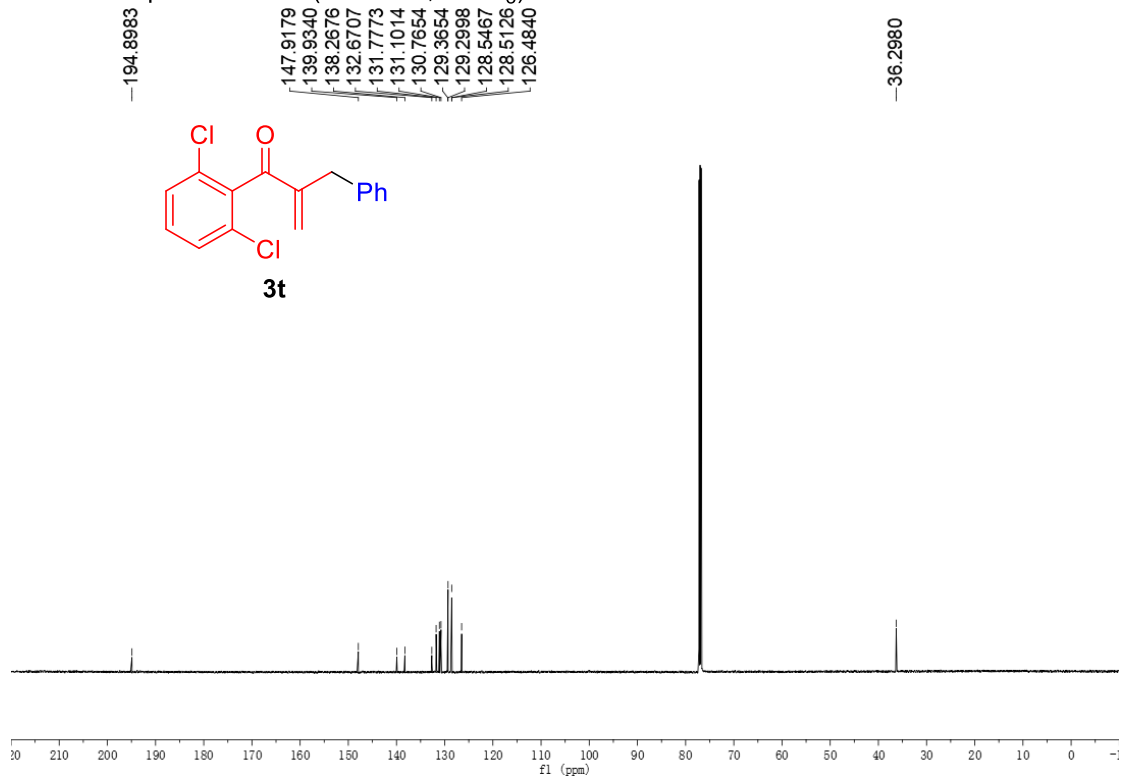

<sup>1</sup>H NMR spectrum of **3u** (600 MHz, CDCl<sub>3</sub>)

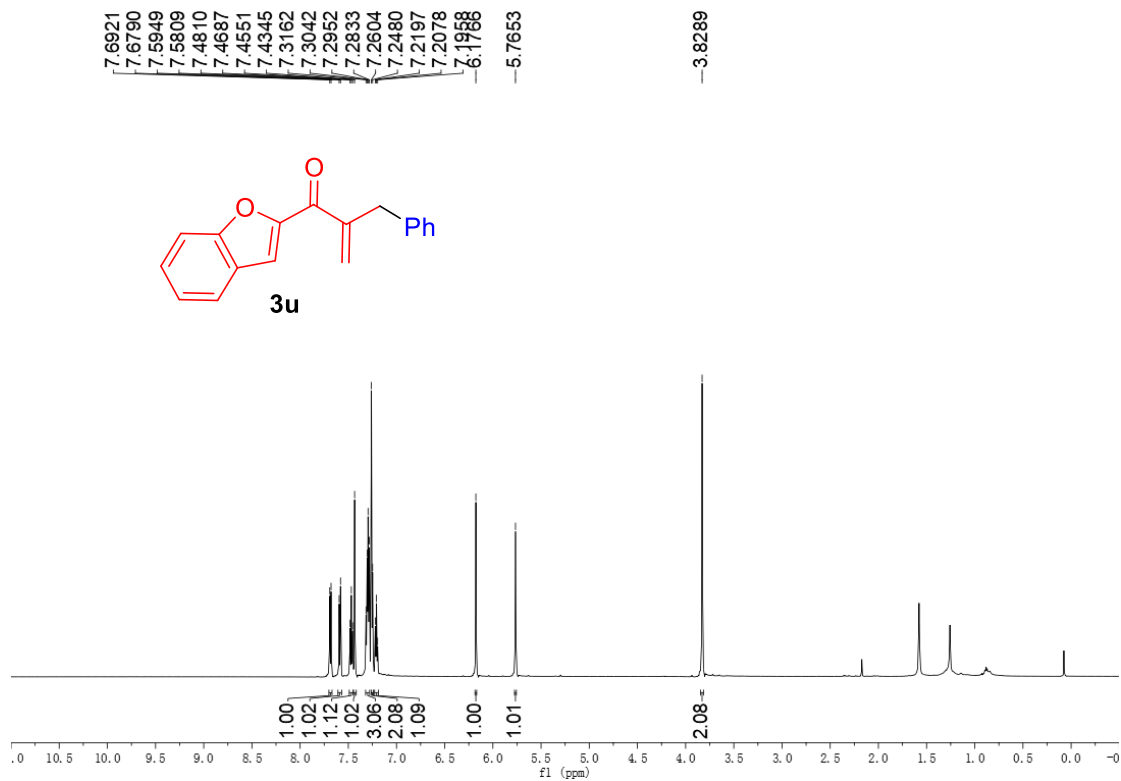

<sup>13</sup>C NMR spectrum of **3u** (151 MHz, CDCl<sub>3</sub>)

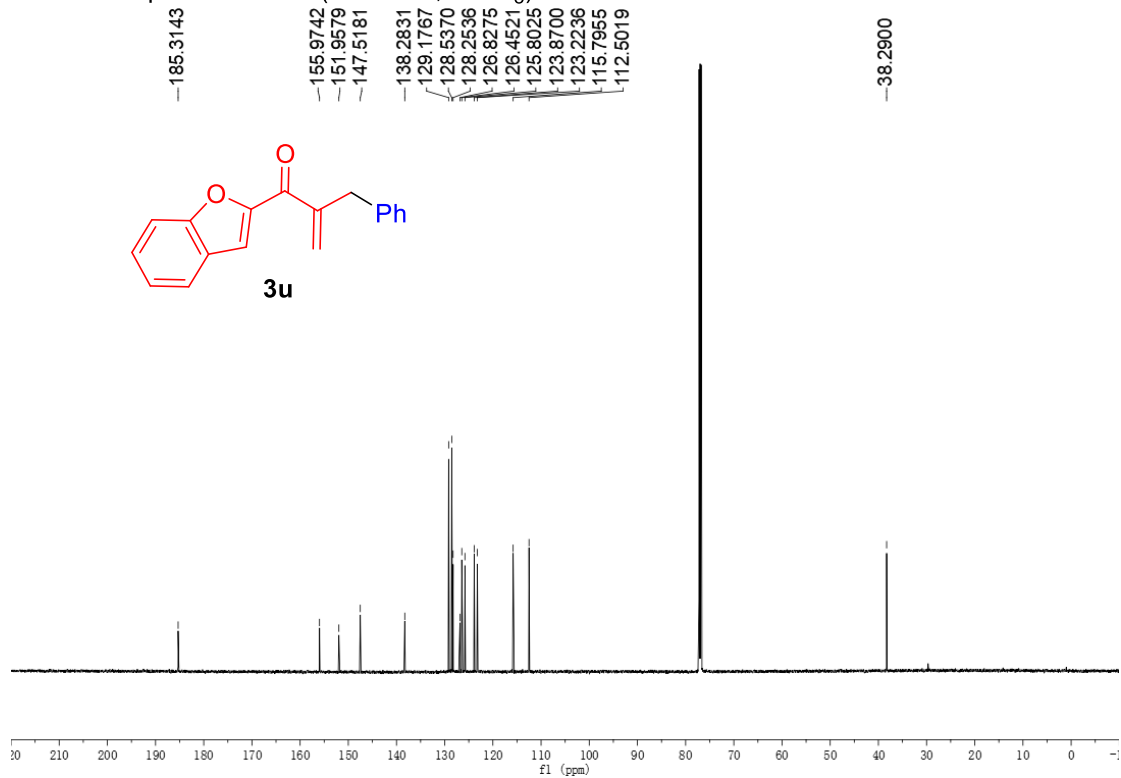

$^1\text{H}$  NMR spectrum of **3v** (600 MHz,  $\text{CDCl}_3$ )

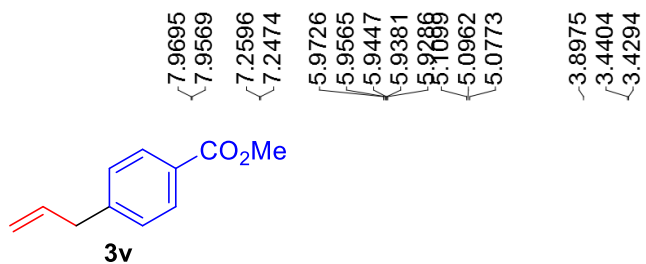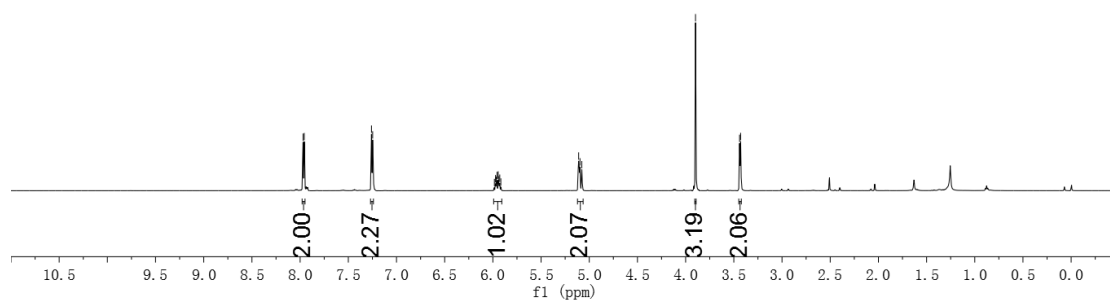

$^{13}\text{C}$  NMR spectrum of **3v** (151 MHz,  $\text{CDCl}_3$ )

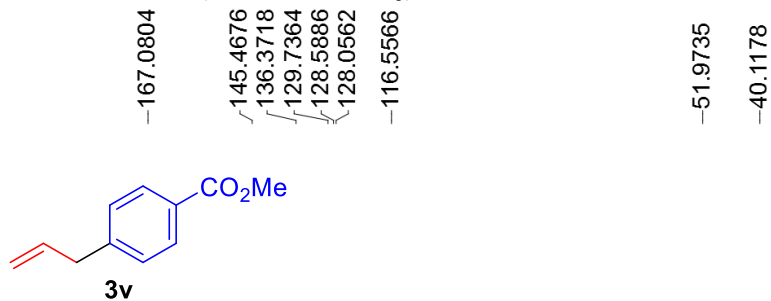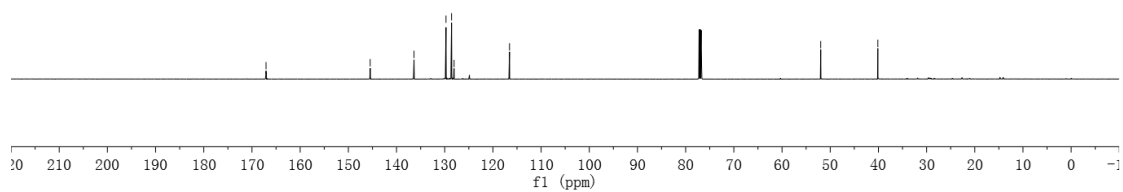

<sup>1</sup>H NMR spectrum of **3w** (600 MHz, CDCl<sub>3</sub>)

7.9922  
7.9785  
7.3230  
7.3094  
6.4818  
6.4553  
6.3621  
6.3507  
6.3392  
6.3359  
6.3244  
6.3130  
3.9109  
3.6091  
3.5978

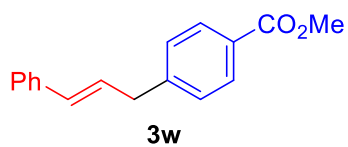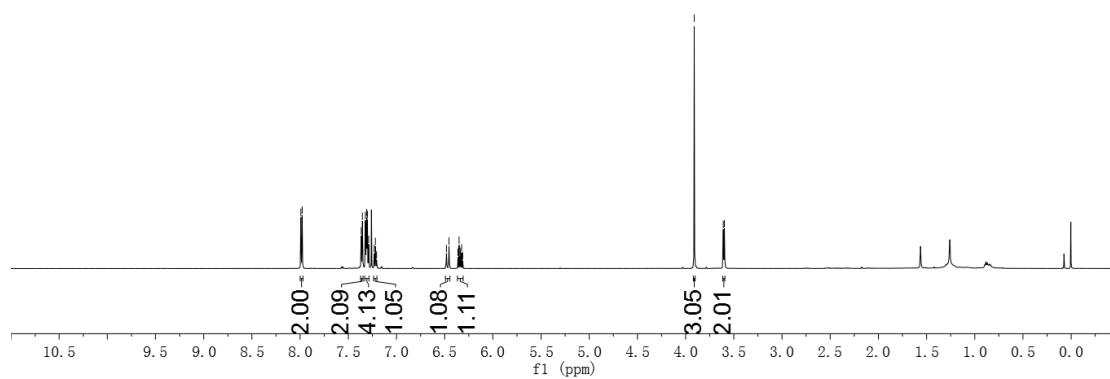

<sup>13</sup>C NMR spectrum of **3w** (151 MHz, CDCl<sub>3</sub>)

167.0761  
145.6064  
137.1685  
131.7958  
129.8296  
128.6772  
128.5405  
128.1850  
128.0207  
127.3092  
126.1406  
-52.0138  
-39.2654

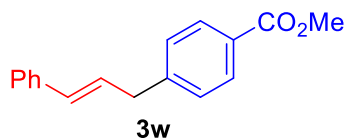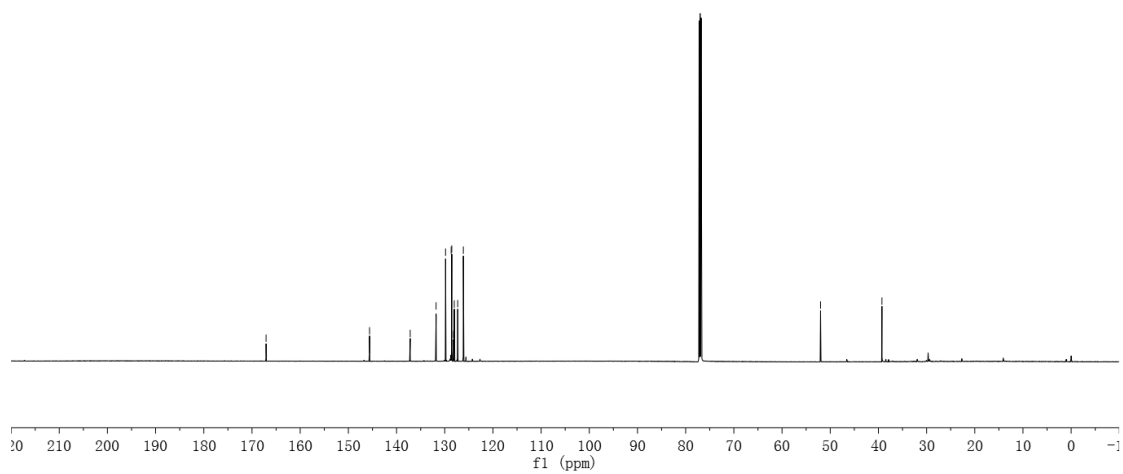

<sup>1</sup>H NMR spectrum of **3x** (600 MHz, CDCl<sub>3</sub>)

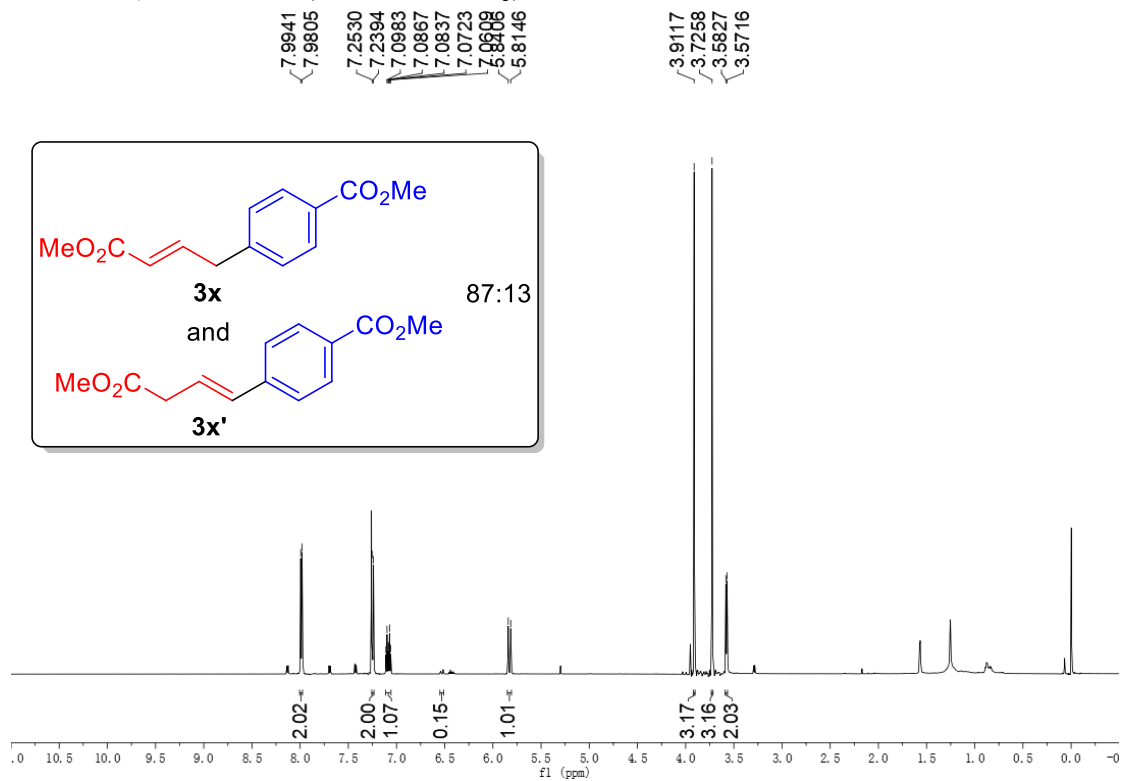

<sup>13</sup>C NMR spectrum of **3x** (151 MHz, CDCl<sub>3</sub>)

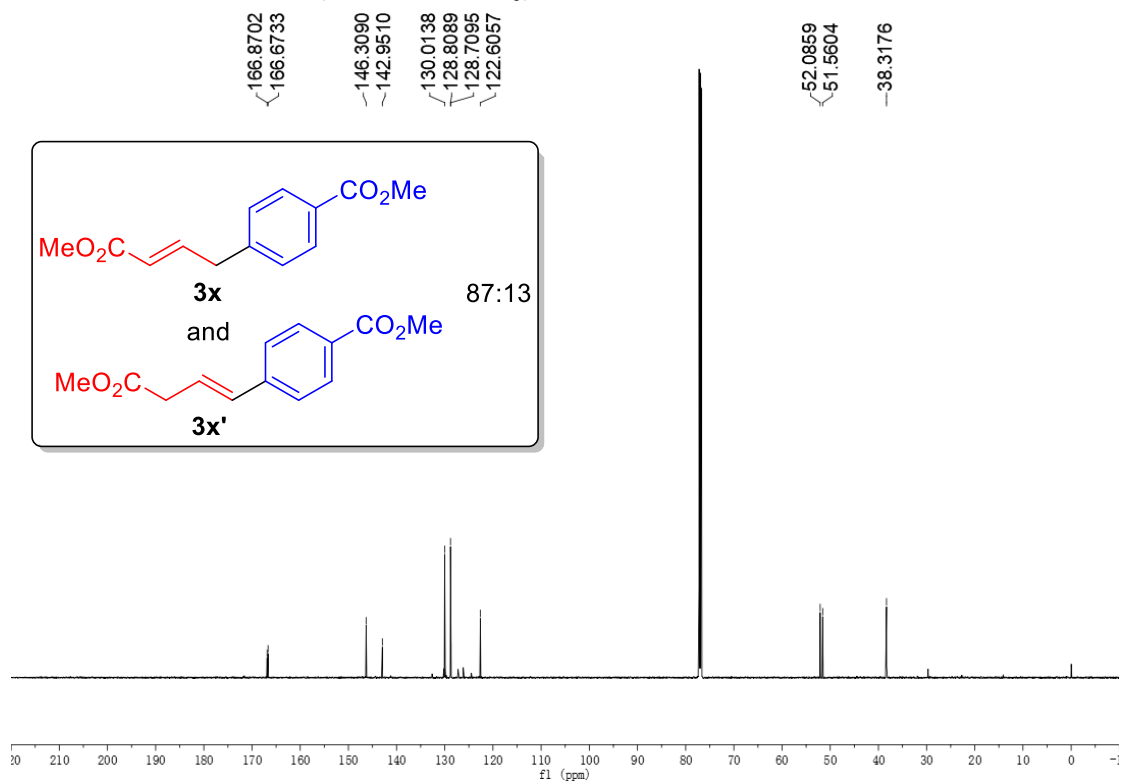

<sup>1</sup>H NMR spectrum of **2a-d<sub>4</sub>** (600 MHz, CDCl<sub>3</sub>)

7.7403  
7.7272  
7.5413  
7.5296  
7.5167  
7.4366  
7.4239  
7.4112  
7.3316  
7.3188  
7.3064  
7.2865  
7.2743  
7.2384  
7.2267  
7.2150

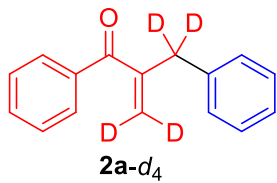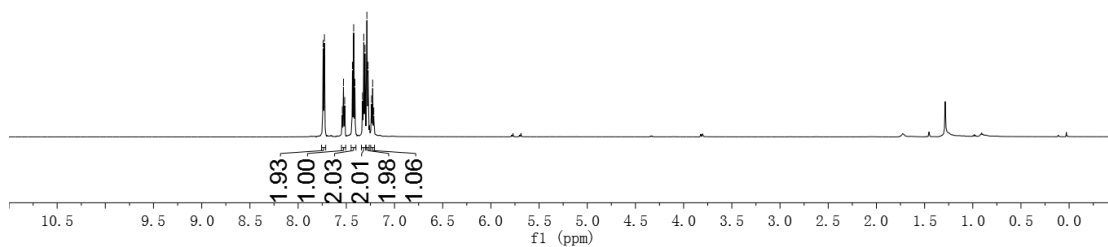

<sup>13</sup>C NMR spectrum of **2a-d<sub>4</sub>** (151 MHz, CDCl<sub>3</sub>)

197.6159  
147.2640  
138.5523  
137.6161  
132.1441  
129.4285  
129.0777  
128.4584  
128.1107  
126.2982  
29.6455

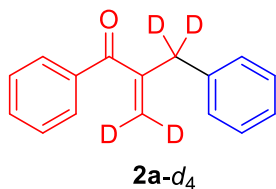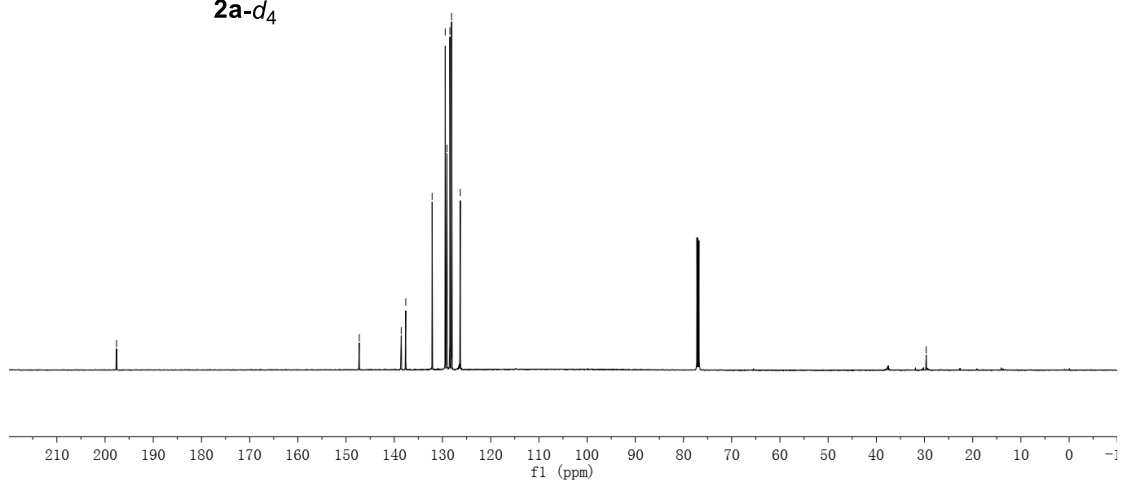

<sup>1</sup>H NMR spectrum of **5a** (600 MHz, CDCl<sub>3</sub>)

7.9782  
7.9646  
7.6992  
7.6869  
7.5352  
7.5228  
7.5105  
7.4249  
7.4121  
7.3993  
7.3398  
7.3262  
5.7953  
5.7266  
3.8922  
3.8524

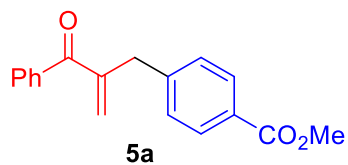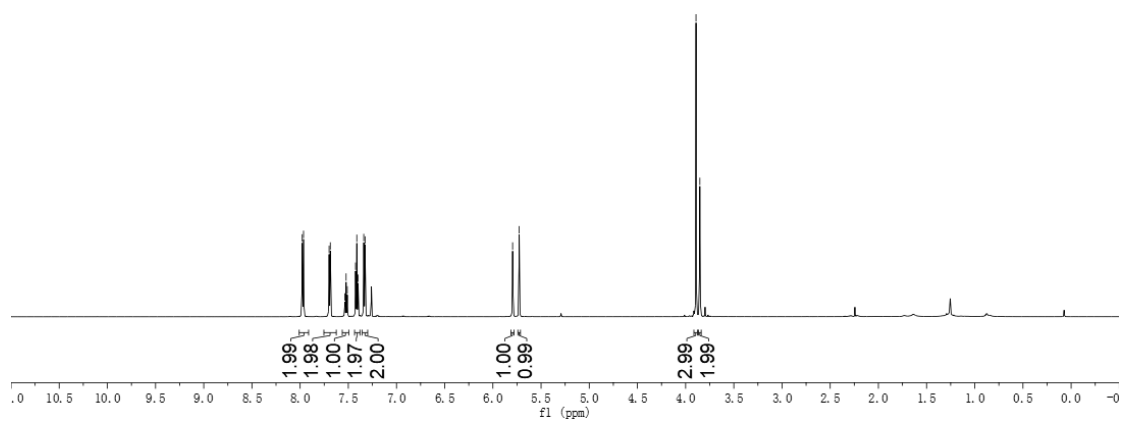

<sup>13</sup>C NMR spectrum of **5a** (151 MHz, CDCl<sub>3</sub>)

197.2451  
166.9812  
146.7670  
144.1973  
137.4613  
132.3129  
129.8526  
129.4286  
129.1383  
128.3685  
128.2175  
127.5259  
52.0029  
38.3603

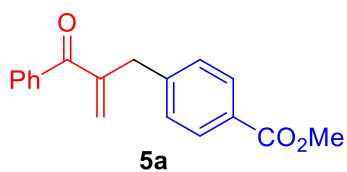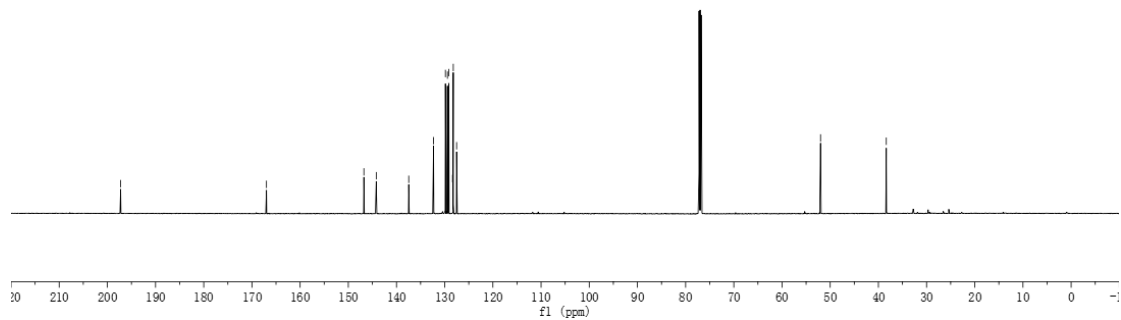

<sup>1</sup>H NMR spectrum of **5b** (600 MHz, CDCl<sub>3</sub>)

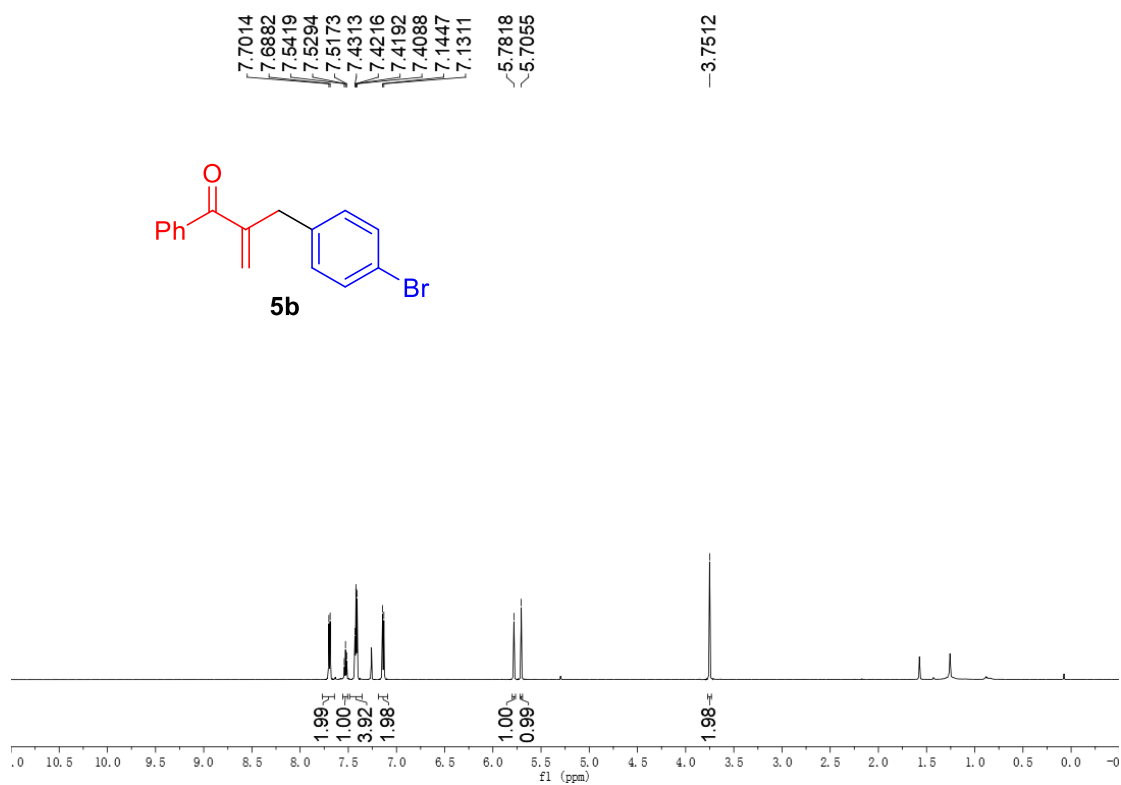

<sup>13</sup>C NMR spectrum of **5b** (151 MHz, CDCl<sub>3</sub>)

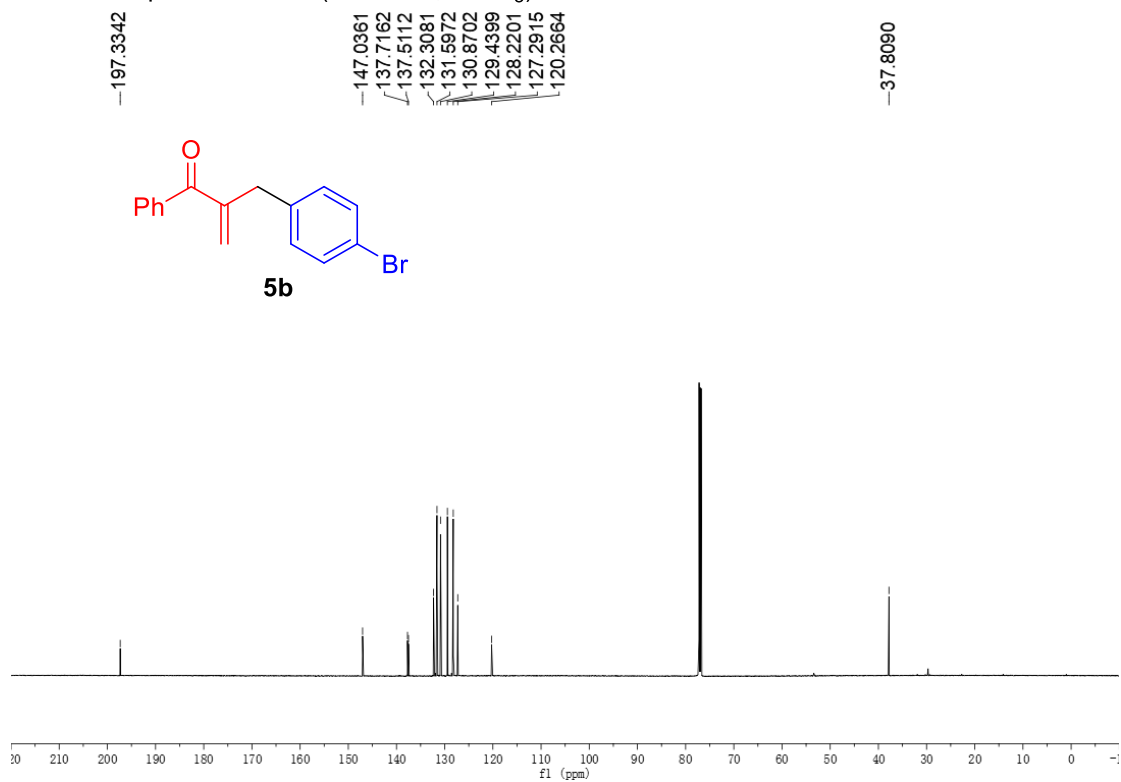



<sup>1</sup>H NMR spectrum of **5c** (600 MHz, CDCl<sub>3</sub>)

7.7097  
7.6977  
7.5389  
7.5270  
7.5146  
7.4295  
7.4176  
7.4053  
7.2716  
7.2596  
7.2039  
7.1913  
5.7855  
5.7074  
-3.7713

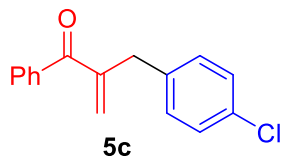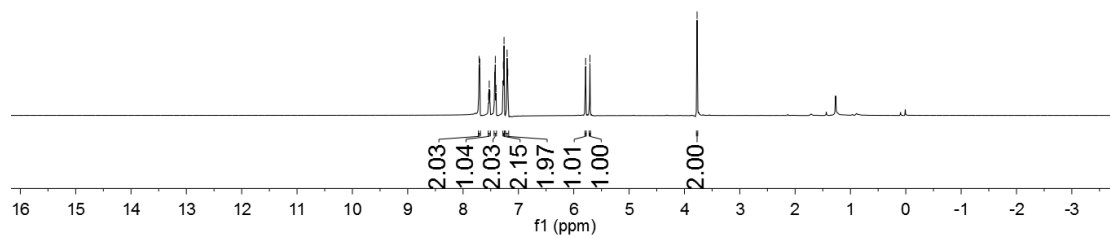

<sup>13</sup>C NMR spectrum of **5c** (151 MHz, CDCl<sub>3</sub>)

197.3594  
147.0684  
137.4812  
137.1495  
132.2988  
132.1527  
130.4565  
129.4272  
128.6171  
128.2003  
127.2894  
37.7182

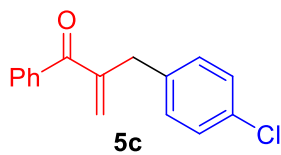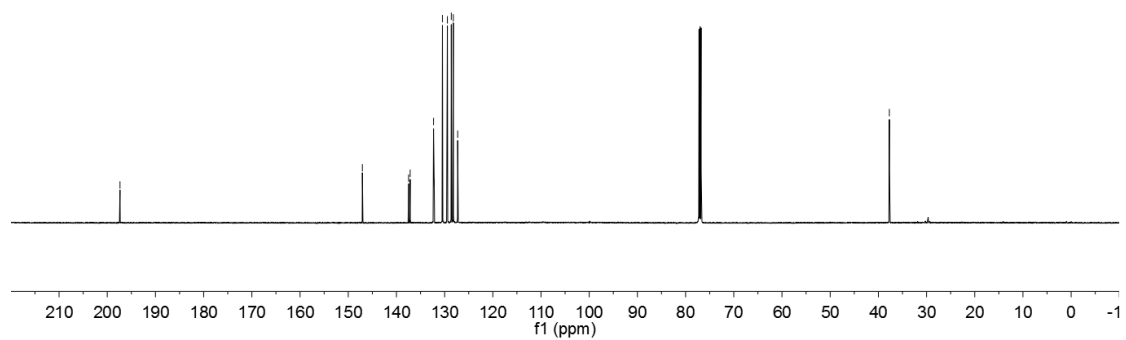

<sup>1</sup>H NMR spectrum of **5d** (600 MHz, CDCl<sub>3</sub>)

7.7171  
7.7041  
7.5407  
7.5280  
7.5162  
7.4312  
7.4192  
7.4074  
7.2353  
7.2257  
7.2151  
7.0006  
6.9863  
6.9741  
5.7762  
5.6980

-3.7794

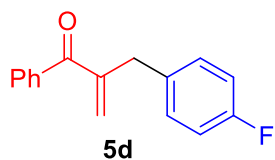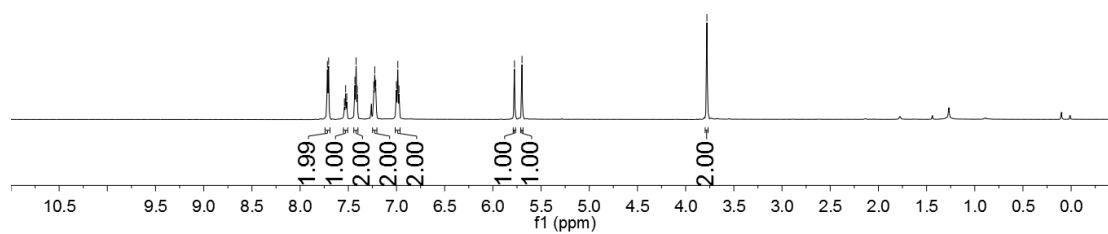

<sup>13</sup>C NMR spectrum of **5d** (151 MHz, CDCl<sub>3</sub>)

197.4732  
162.2629  
160.6448  
132.2561  
130.5299  
130.4775  
129.3977  
128.1493  
127.0889  
115.3137  
115.1729

-37.5117

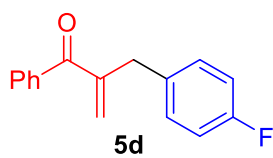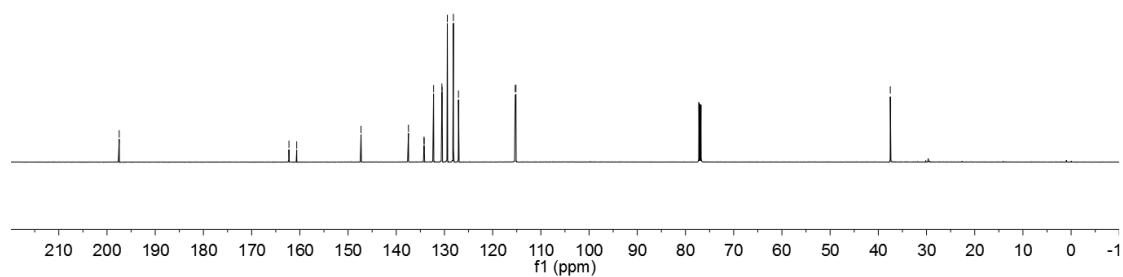

<sup>1</sup>H NMR spectrum of **5e** (600 MHz, CDCl<sub>3</sub>)

7.6896  
7.6763  
7.5957  
7.5822  
7.5530  
7.5408  
7.5285  
7.4389  
7.4262  
7.4134  
7.3858  
7.3723  
5.8508  
5.7803  
3.8542

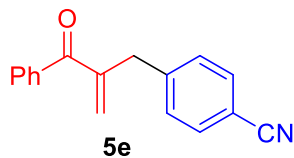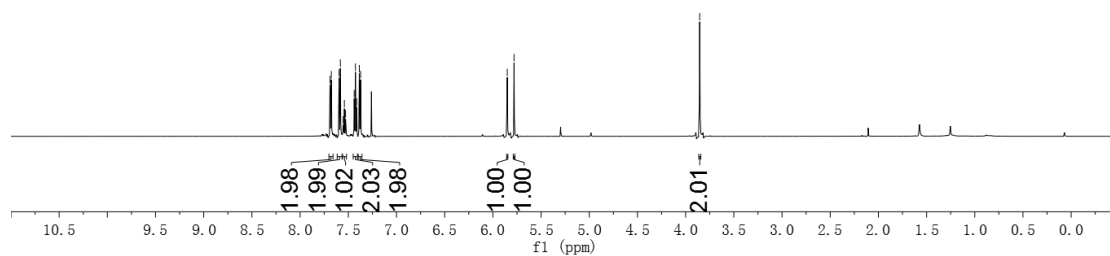

<sup>13</sup>C NMR spectrum of **5e** (151 MHz, CDCl<sub>3</sub>)

196.9402  
146.1181  
144.4998  
137.2829  
132.4612  
132.3416  
129.8202  
129.3900  
128.3000  
128.1591  
118.8795  
110.3756  
38.5368

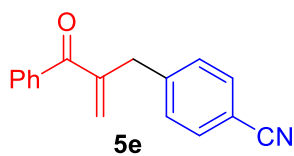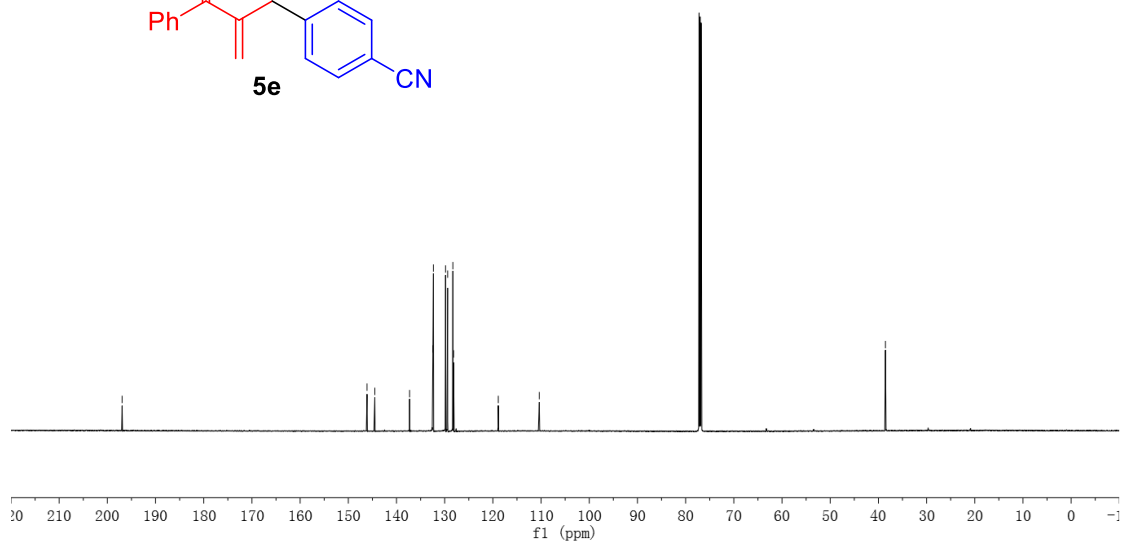

<sup>1</sup>H NMR spectrum of **5f** (600 MHz, CDCl<sub>3</sub>)

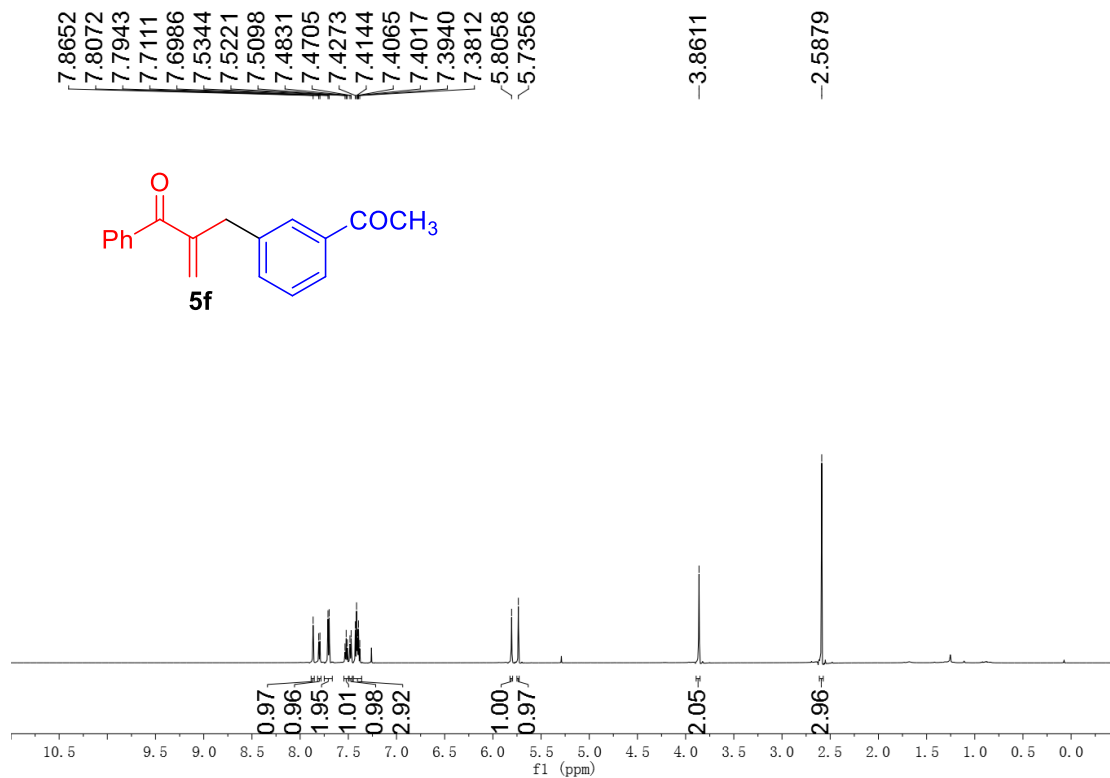

<sup>13</sup>C NMR spectrum of **5f** (151 MHz, CDCl<sub>3</sub>)

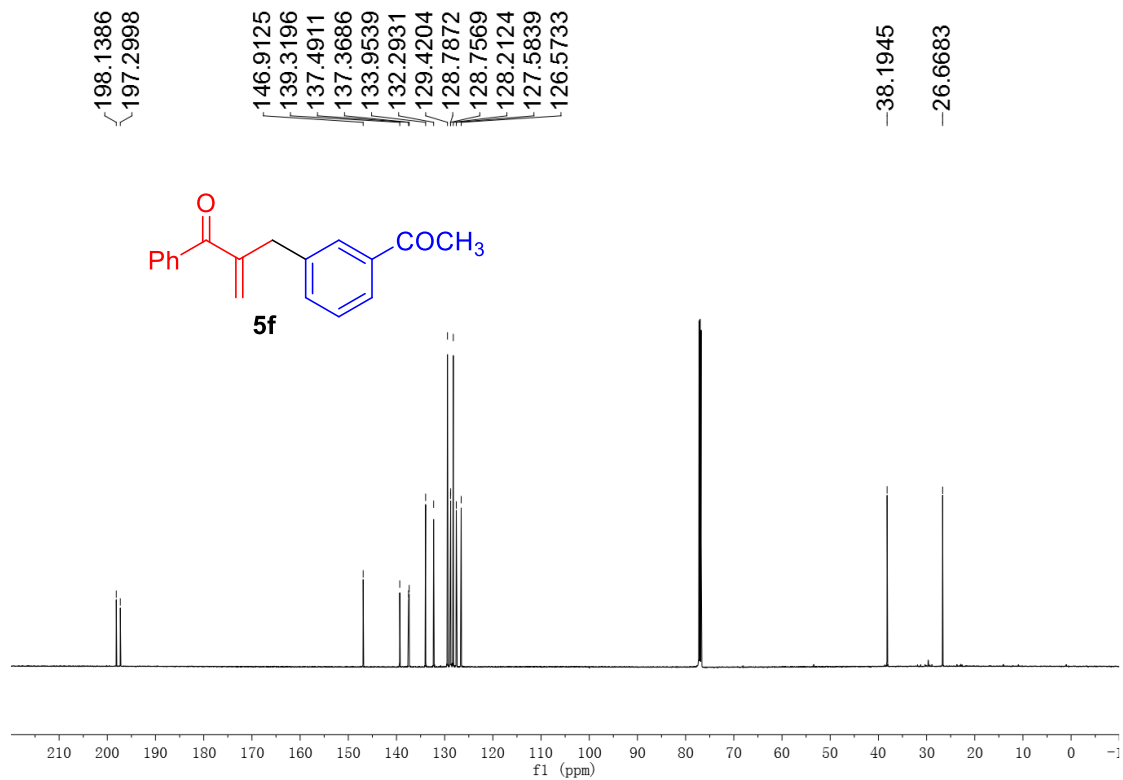

<sup>1</sup>H NMR spectrum of **5g** (600 MHz, CDCl<sub>3</sub>)

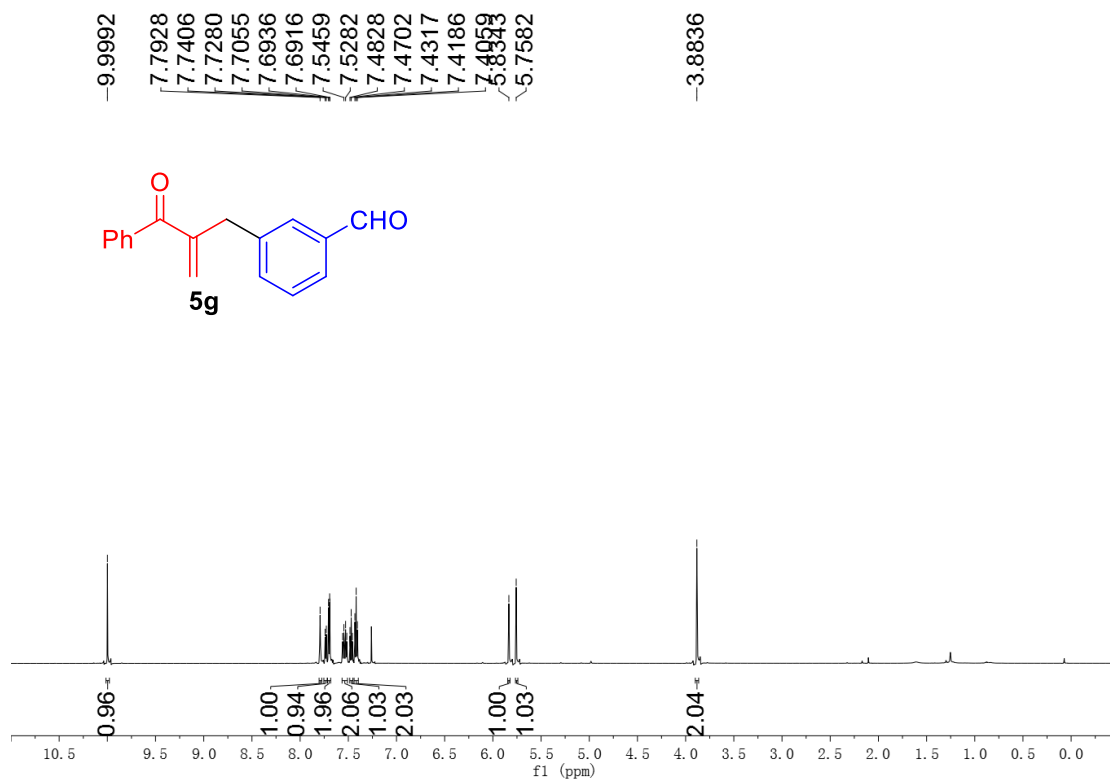

<sup>13</sup>C NMR spectrum of **5g** (151 MHz, CDCl<sub>3</sub>)

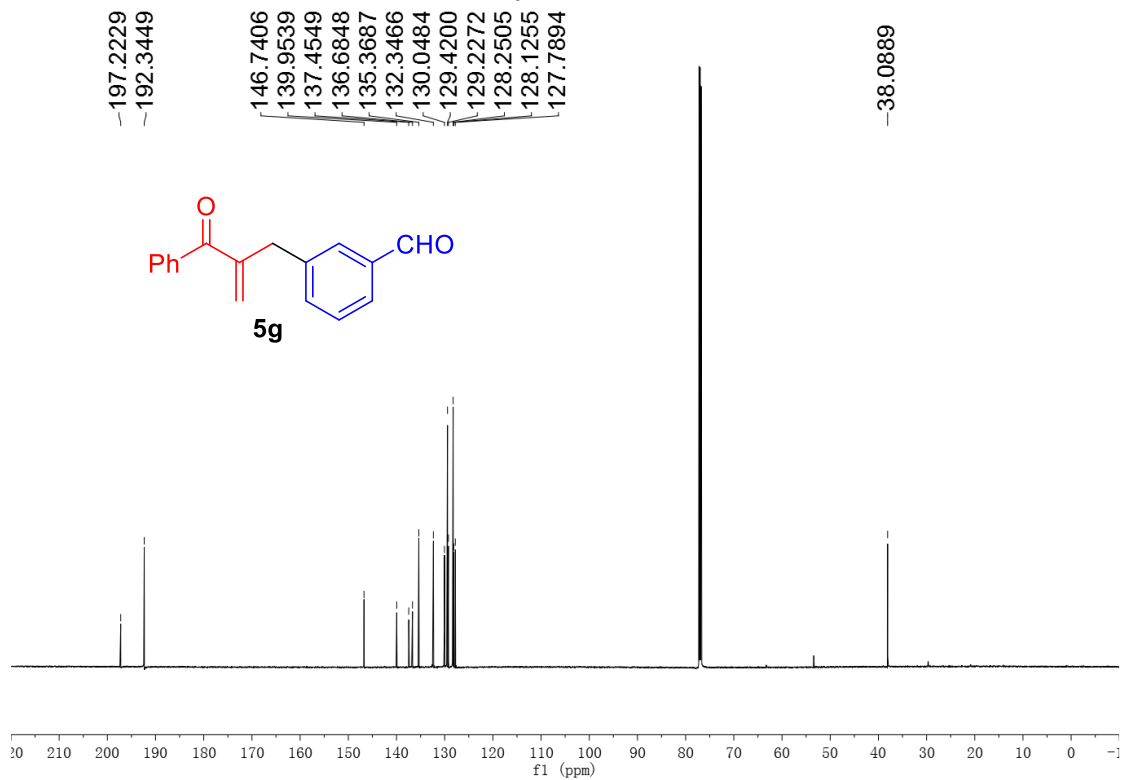

<sup>1</sup>H NMR spectrum of **5h** (600 MHz, CDCl<sub>3</sub>)

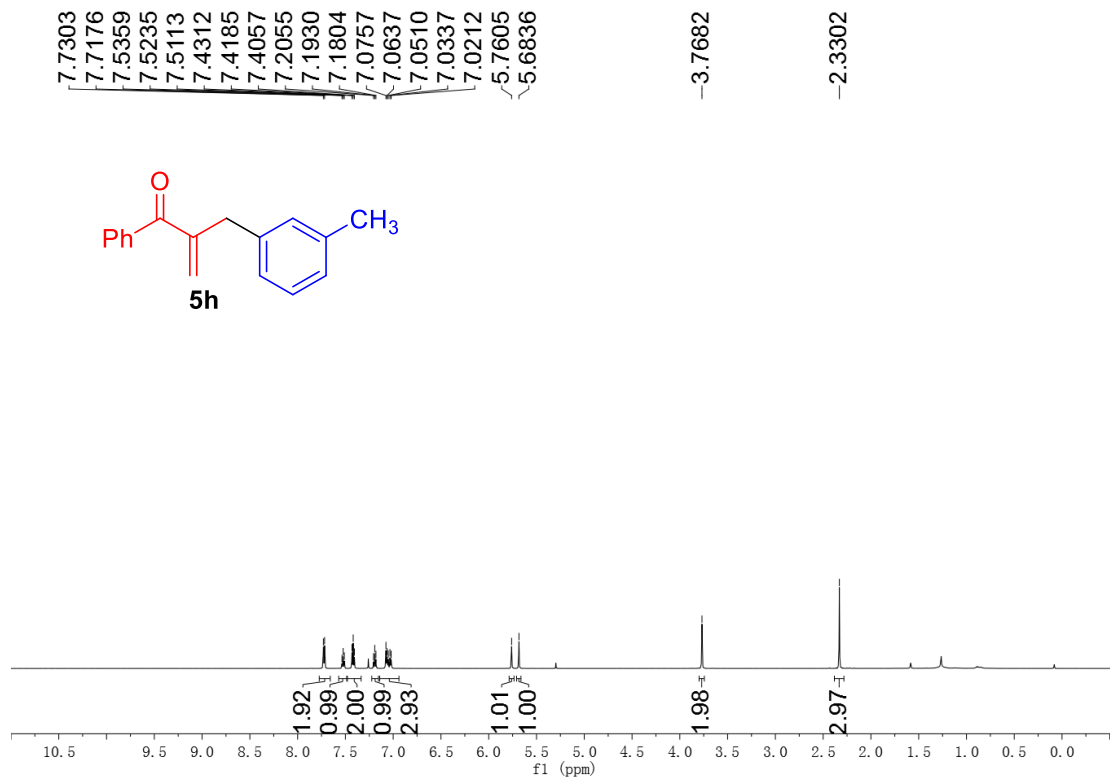

<sup>13</sup>C NMR spectrum of **5h** (151 MHz, CDCl<sub>3</sub>)

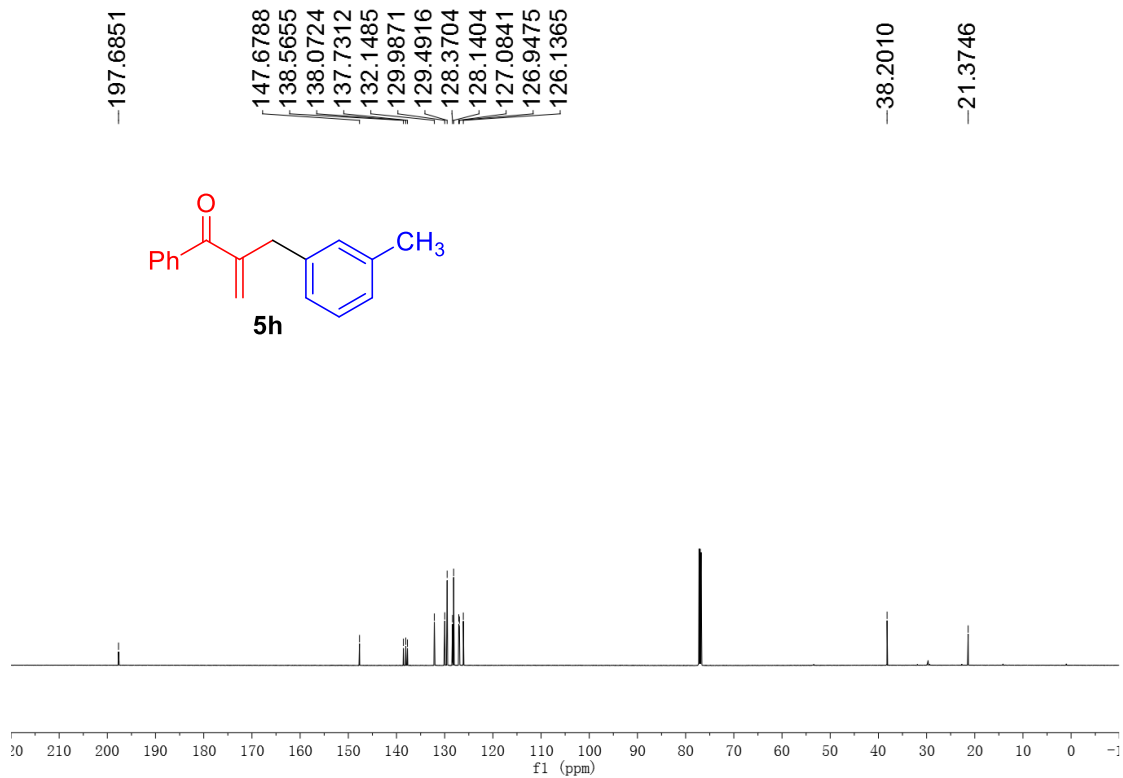

<sup>1</sup>H NMR spectrum of **5i** (600 MHz, CDCl<sub>3</sub>)

7.7137  
7.7013  
7.5403  
7.5283  
7.5162  
7.4331  
7.4214  
7.4096  
7.2604  
7.2352  
7.2229  
7.2102  
7.1947  
7.1819  
7.1527  
7.1408  
5.7997  
5.7323

-3.7738

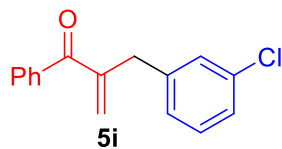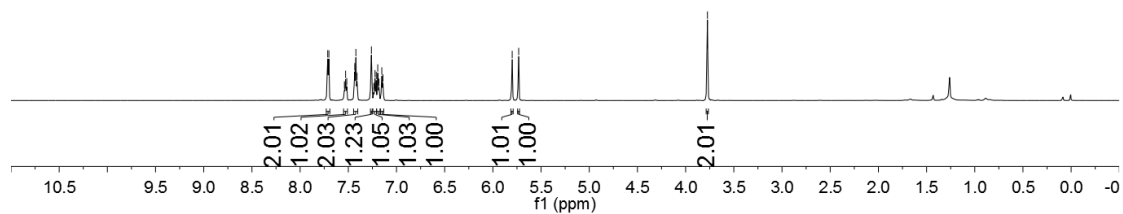

<sup>13</sup>C NMR spectrum of **5i** (151 MHz, CDCl<sub>3</sub>)

197.2621  
146.7787  
140.7254  
137.4759  
134.2214  
132.2934  
129.7456  
129.4392  
129.1856  
128.2152  
127.6706  
127.3499  
126.5993

-37.9235

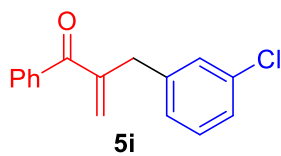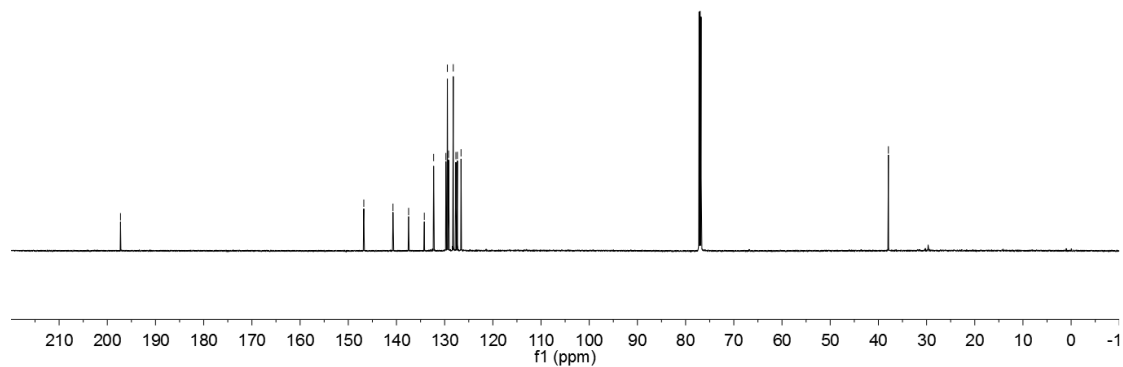

<sup>1</sup>H NMR spectrum of **5j** (600 MHz, CDCl<sub>3</sub>)

7.7435  
7.7307  
7.5513  
7.5394  
7.5277  
7.4434  
7.4313  
7.4188  
7.4051  
7.2604  
7.2451  
7.2019  
7.1883  
5.7373  
5.6736

3.8779

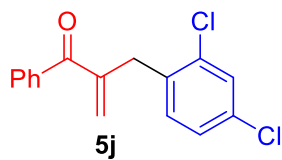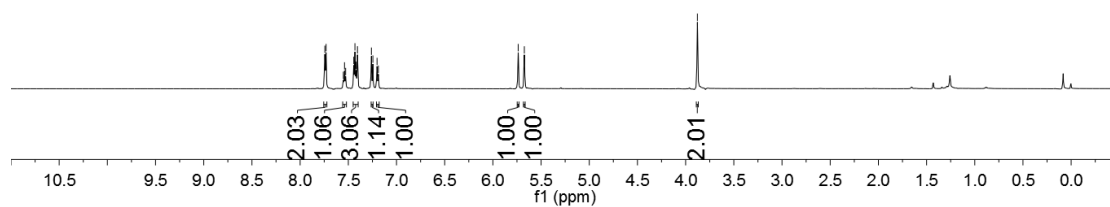

<sup>13</sup>C NMR spectrum of **5j** (151 MHz, CDCl<sub>3</sub>)

197.3103

145.0639  
137.4087  
135.1002  
135.0037  
132.9999  
132.3524  
129.4945  
129.3982  
128.2176  
127.7201  
127.1945

35.3191

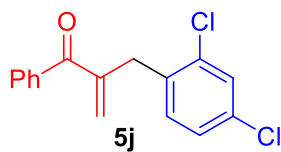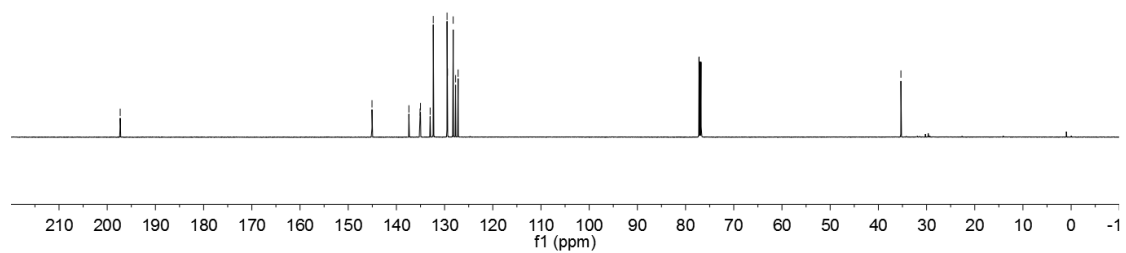



<sup>1</sup>H NMR spectrum of **5k** (600 MHz, CDCl<sub>3</sub>)

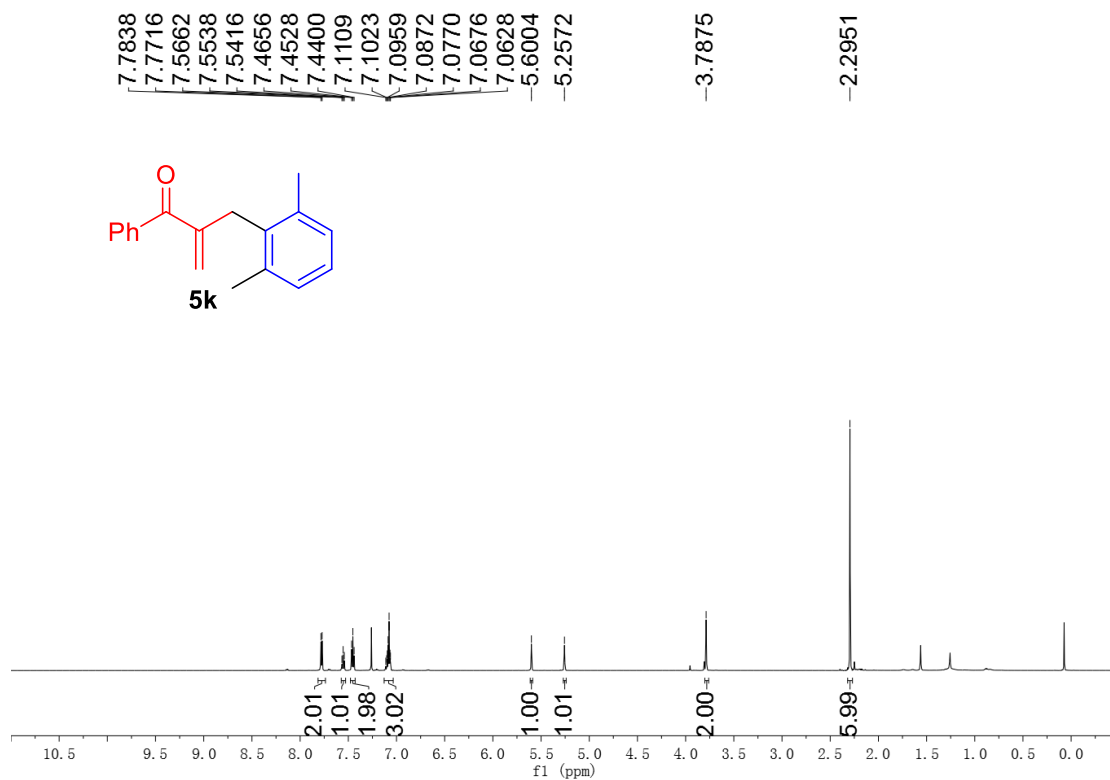

<sup>13</sup>C NMR spectrum of **5k** (151 MHz, CDCl<sub>3</sub>)

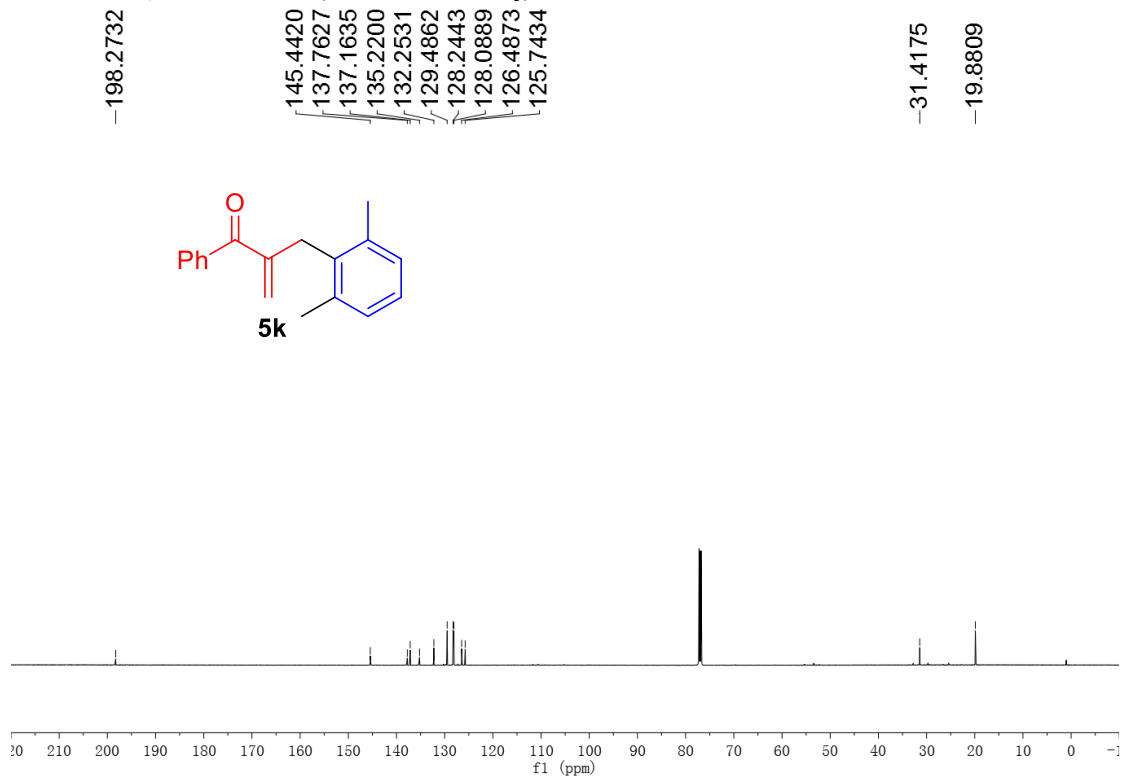

<sup>1</sup>H NMR spectrum of **5I** (600 MHz, CDCl<sub>3</sub>)

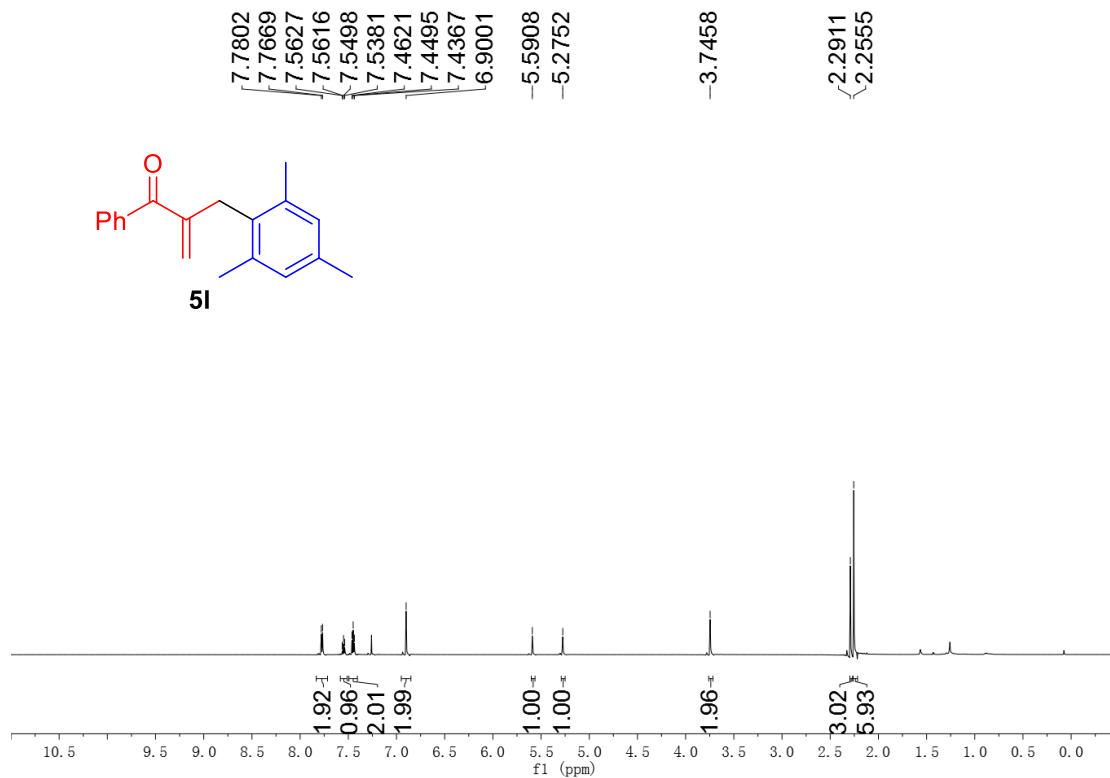

<sup>13</sup>C NMR spectrum of **5I** (151 MHz, CDCl<sub>3</sub>)

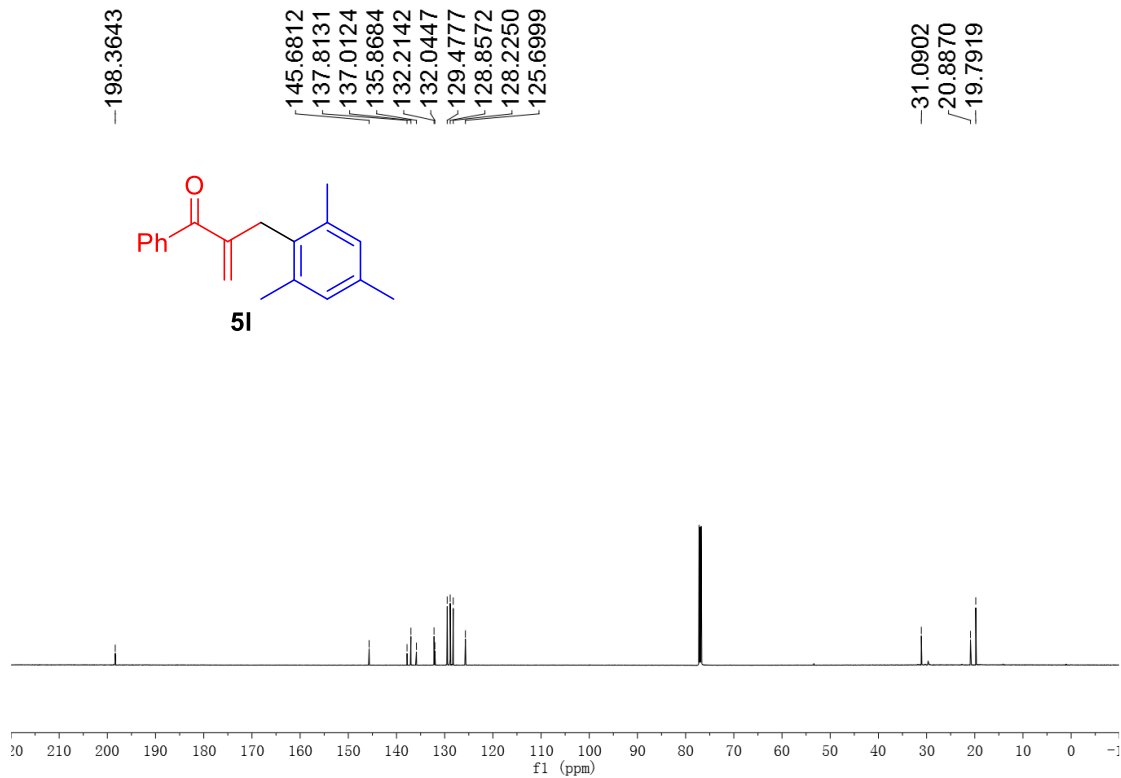

<sup>1</sup>H NMR spectrum of **5m** (600 MHz, CDCl<sub>3</sub>)

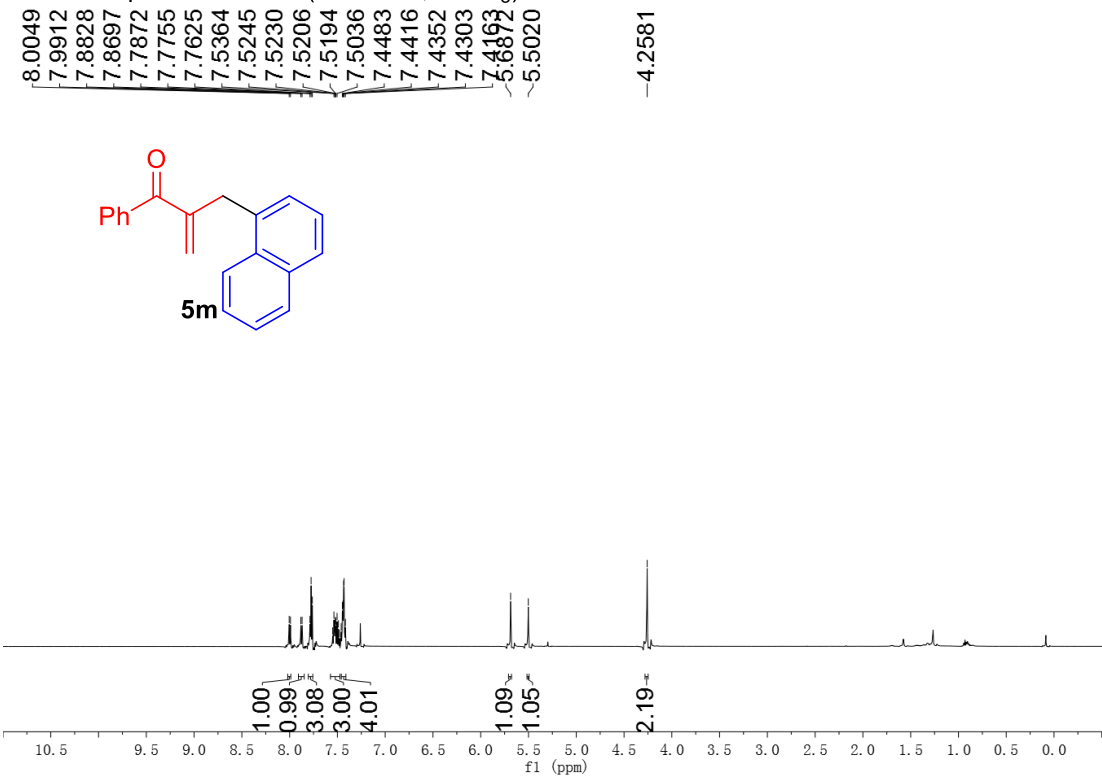

<sup>13</sup>C NMR spectrum of **5m** (151 MHz, CDCl<sub>3</sub>)

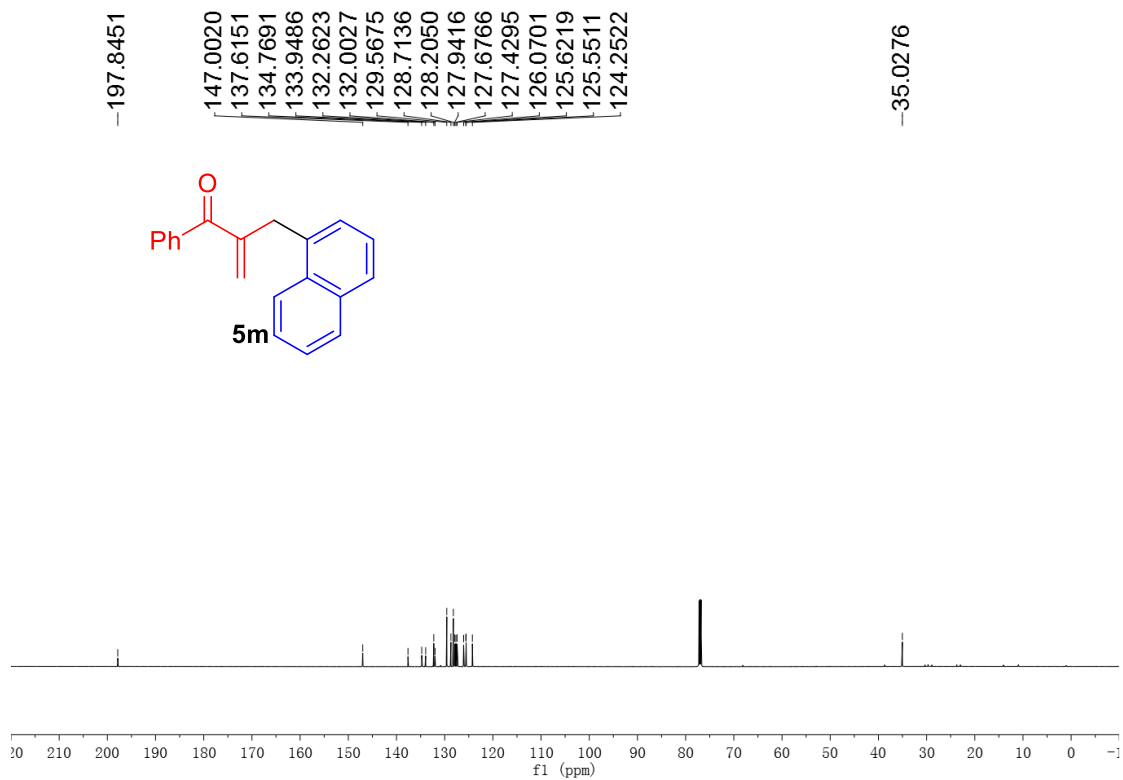

<sup>1</sup>H NMR spectrum of **5n** (600 MHz, CDCl<sub>3</sub>)

7.8219  
7.8092  
7.7957  
7.7450  
7.7313  
7.7296  
7.5333  
7.5212  
7.5089  
7.4774  
7.4663  
7.4534  
7.4399  
7.4282  
7.4150  
7.4019  
5.8089  
5.7331  
-3.9798

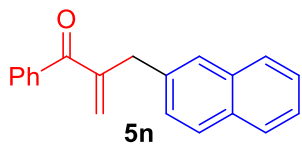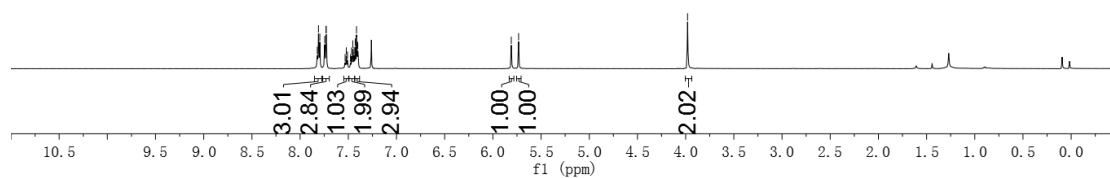

<sup>13</sup>C NMR spectrum of **5n** (151 MHz, CDCl<sub>3</sub>)

197.6398  
147.5164  
137.6232  
136.1696  
133.5673  
132.2145  
132.1510  
129.4909  
128.1648  
128.1247  
127.6591  
127.5858  
127.5519  
127.2737  
125.9646  
125.4367  
-38.4175

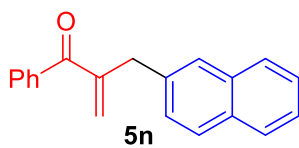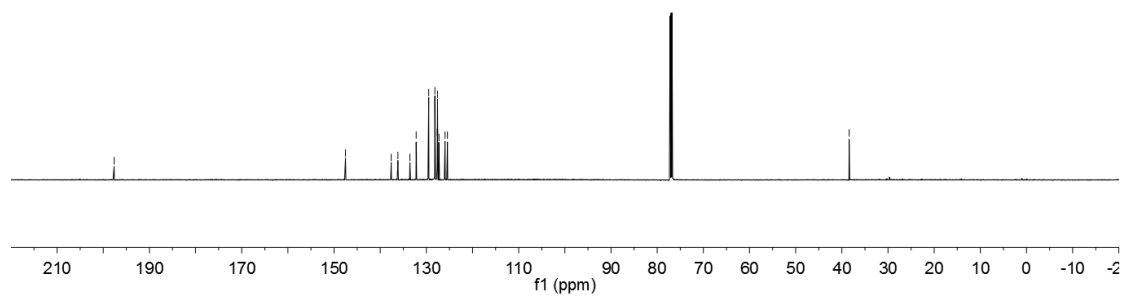

<sup>1</sup>H NMR spectrum of **5o** (400 MHz, CDCl<sub>3</sub>)

7.7876  
7.7746  
7.7700  
7.7664  
7.5700  
7.5516  
7.5468  
7.5362  
7.5330  
7.5299  
7.4692  
7.4498  
7.4353  
7.4315  
7.3899  
7.3865  
7.3684  
7.3263  
7.3216  
7.3080  
7.2886  
7.2414  
7.2385  
7.2354  
7.2254  
7.2204  
7.2023  
6.5445  
6.5049  
6.3439  
6.3263  
6.3087  
6.3046  
6.2869  
6.2692  
5.9521  
5.7215  
3.4021  
3.4006  
3.3846

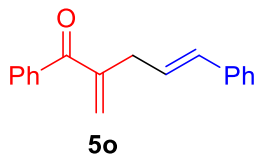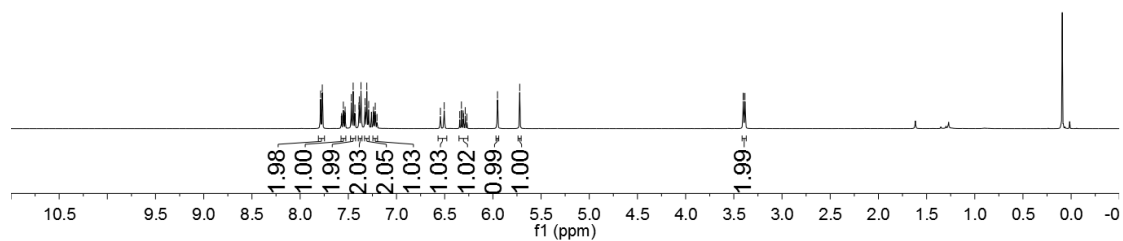

<sup>13</sup>C NMR spectrum of **5o** (101 MHz, CDCl<sub>3</sub>)

197.6915  
146.5132  
137.6334  
137.2699  
132.4420  
132.2009  
129.4788  
128.4850  
128.1942  
127.2220  
126.7597  
126.5145  
126.1182  
35.3708

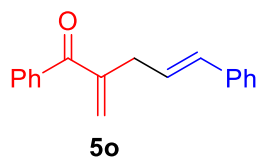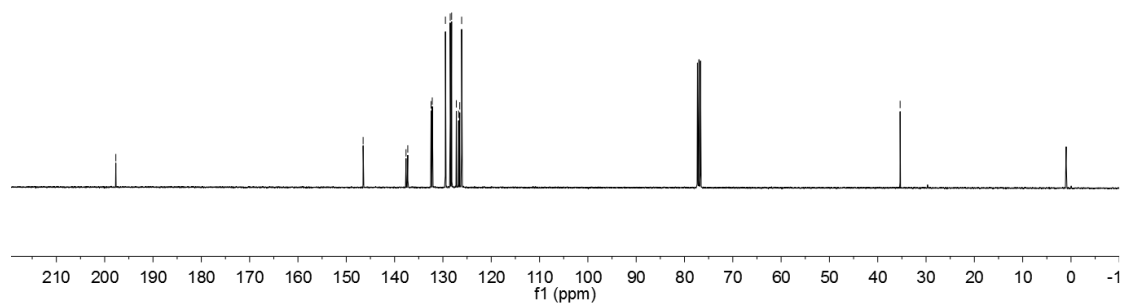

<sup>1</sup>H NMR spectrum of **5p** (600 MHz, CDCl<sub>3</sub>)

7.7342  
7.7223  
7.7206  
7.5447  
7.5324  
7.5200  
7.4391  
7.4262  
7.4134  
7.2704  
7.2653  
7.2601  
7.2577  
7.0516  
7.0500  
7.0487  
6.9850  
6.9769  
5.8048  
5.6888

—3.8270

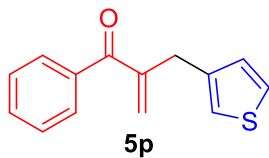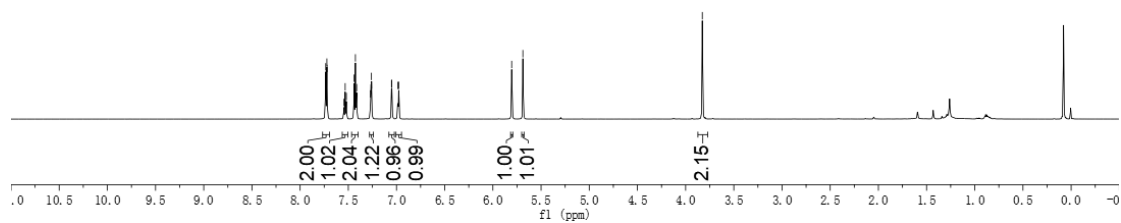

<sup>13</sup>C NMR spectrum of **5p** (151 MHz, CDCl<sub>3</sub>)

—197.5642  
147.0068  
138.7770  
137.6322  
132.2264  
129.4675  
128.4919  
128.1831  
126.7857  
125.6632  
121.9283

—32.8396

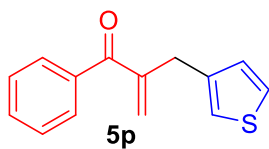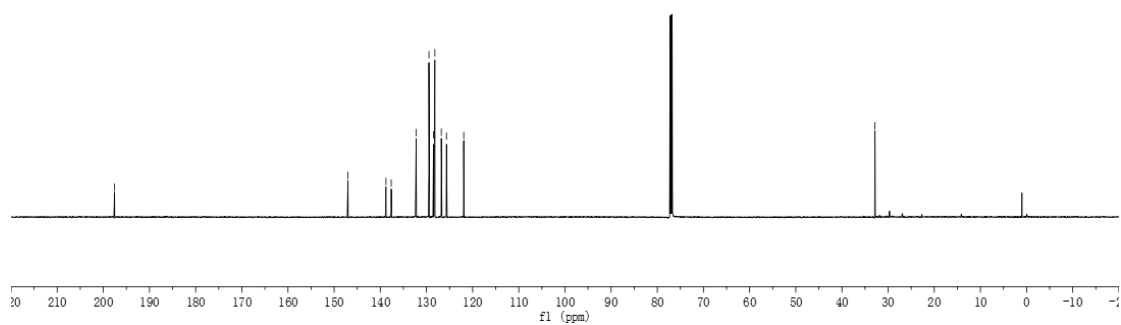

Supplement: d1qo01106e1.pdf [file d1qo01106e1.pdf]
